# Supplementary material for: Furofuranoid-Type Lignans and Related Phenolics from Anisacanthus virgularis (Salisb.) Nees with Promising Anticholinesterase and Anti-Ageing Properties: A Study Supported by Molecular Modelling
Source: MDPI journal article supplement (doi:10.3390/plants13020150), 2024-01-05
Supplement: s1 [file s1]

## SUPPLEMENTARY MATERIALS

# Furofuranoid-type lignans and related phenolics from *Anisacanthus virgularis* (Salisb.) Nees with promising anticholinesterase and anti-ageing properties: A study supported by molecular modelling

Mohamed A. A. Orabi<sup>1,\*,#</sup>, Reda A. Abdelhamid<sup>2</sup>, Hanan Elimam<sup>3</sup>, Yaseen A.M.M. Elshaier<sup>4</sup>, A. A. Ali<sup>5</sup>, Nayef Aldabaan<sup>6</sup>, Abdulaziz Hassan Alhasaniah<sup>7</sup>, and Mohamed S. Refaey<sup>8,\*,#</sup>

<sup>1</sup> Department of Pharmacognosy, College of Pharmacy, Najran University, Najran 66454, Saudi Arabia; mohamedorabi@azhar.edu.eg; [maorabi@nu.edu.sa](mailto:maorabi@nu.edu.sa).

<sup>2</sup> Department of Pharmacognosy, Faculty of Pharmacy, Al-Azhar University, Assiut-Branch, 71524 Assiut, Egypt; [reda.ahmed@azhar.edu.eg](mailto:reda.ahmed@azhar.edu.eg).

<sup>3</sup> Department of Biochemistry, Faculty of Pharmacy, University of Sadat City, Sadat City, 32958, Egypt; [hanan.elimam@fop.usc.edu.eg](mailto:hanan.elimam@fop.usc.edu.eg).

<sup>4</sup> Department of Organic and Medicinal chemistry, Faculty of Pharmacy, University of Sadat City, Sadat City, Menoufiya 32958, Egypt; [yaseen.elshaier@fop.usc.edu.eg](mailto:yaseen.elshaier@fop.usc.edu.eg).

<sup>5</sup> Department of Pharmacognosy, Faculty of Pharmacy, Assiut University, Assiut 71526, Egypt; [ahmed.ibrahim4@pharm.aun.edu.eg](mailto:ahmed.ibrahim4@pharm.aun.edu.eg).

<sup>6</sup> Department of Pharmacology, College of Pharmacy, Najran University 1988, Najran 66454, Saudi Arabia; [naaldabaan@nu.edu.sa](mailto:naaldabaan@nu.edu.sa)

<sup>7</sup> Department of Clinical Laboratory Sciences, Faculty of Applied Medical Sciences, Najran University, Najran 66454, Saudi Arabia; [Ahalhasaniah@nu.edu.sa](mailto:Ahalhasaniah@nu.edu.sa) (AHA).

<sup>8</sup> Department of Pharmacognosy, Faculty of Pharmacy, University of Sadat City, Sadat City, Menoufiya, 32958, Egypt; [mohamed.said@fop.usc.edu.eg](mailto:mohamed.said@fop.usc.edu.eg).

\* Correspondence: [mohamedorabi@azhar.edu.eg](mailto:mohamedorabi@azhar.edu.eg) (MAAO); [mohamed.said@fop.usc.edu.eg](mailto:mohamed.said@fop.usc.edu.eg) (MSR).

# Both authors contributed equally to this work

## List of content

| No.        | Contents                                                                                           | Page |
|------------|----------------------------------------------------------------------------------------------------|------|
|            | List of abbreviation                                                                               | S1   |
| Figure S1  | Positive FAB-MS spectrum of compound 1                                                             | S2   |
| Figure S2  | Positive HRESIMS spectrum of compound 1                                                            | S3   |
| Figure S3  | <sup>1</sup> H NMR spectrum of compound 1 (CD <sub>3</sub> OD, 500 MHz).                           | S4   |
| Figure S4  | Expanded <sup>1</sup> H NMR spectrum of compound 1 (CD <sub>3</sub> OD, 500 MHz).                  | S5   |
| Figure S5  | Expanded <sup>1</sup> H NMR spectrum of compound 1 (CD <sub>3</sub> OD, 500 MHz).                  | S6   |
| Figure S6  | <sup>1</sup> H- <sup>1</sup> H COSY spectrum of compound 1 (CD <sub>3</sub> OD, 500 MHz).          | S7   |
| Figure S7  | Expanded <sup>1</sup> H- <sup>1</sup> H COSY spectrum of compound 1 (CD <sub>3</sub> OD, 500 MHz). | S8   |
| Figure S8  | Expanded <sup>1</sup> H- <sup>1</sup> H COSY spectrum of compound 1 (CD <sub>3</sub> OD, 500 MHz). | S9   |
| Figure S9  | <sup>13</sup> C NMR spectrum of compound 1 (CD <sub>3</sub> OD, 125 MHz).                          | S10  |
| Figure S10 | Expanded <sup>13</sup> C NMR spectrum of compound 1 (CD <sub>3</sub> OD, 125 MHz).                 | S11  |
| Figure S11 | HSQC spectrum of compound 1.                                                                       | S12  |
| Figure S12 | Expanded HSQC spectrum of compound 1.                                                              | S13  |
| Figure S13 | Expanded HSQC spectrum of compound 1.                                                              | S14  |
| Figure S14 | HMBC spectrum of compound 1.                                                                       | S15  |
| Figure S15 | Expanded HMBC spectrum of compound 1.                                                              | S16  |
| Figure S16 | Expanded HMBC spectrum of compound 1.                                                              | S17  |
| Figure S17 | EI-MS spectrum of compound 2                                                                       | S18  |
| Figure S18 | <sup>1</sup> H NMR spectrum of compound 2 (CDCl <sub>3</sub> , 400 MHz).                           | S19  |
| Figure S19 | <sup>13</sup> C NMR spectrum of compound 2 (CDCl <sub>3</sub> , 100 MHz).                          | S20  |
| Figure S20 | EI-MS spectrum of compound 3                                                                       | S21  |
| Figure S21 | <sup>1</sup> H NMR spectrum of compound 3 (CDCl <sub>3</sub> , 400 MHz).                           | S22  |
| Figure S22 | <sup>13</sup> C NMR spectrum of compound 3 (CDCl <sub>3</sub> , 100 MHz).                          | S23  |
| Figure S23 | Positive FAB-MS spectrum of compound 4.                                                            | S24  |
| Figure S24 | <sup>1</sup> H NMR spectrum of compound 4 (DMSO- <i>d</i> <sub>6</sub> , 400 MHz).                 | S25  |
| Figure S25 | <sup>13</sup> C NMR spectrum of compound 4 (DMSO- <i>d</i> <sub>6</sub> , 100 MHz).                | S26  |
| Figure S26 | Positive FAB-MS spectrum of compound 5.                                                            | S27  |
| Figure S27 | <sup>1</sup> H NMR spectrum of compound 5 (CD <sub>3</sub> OD, 400 MHz).                           | S28  |
| Figure S28 | <sup>13</sup> C NMR spectrum of compound 5 (CD <sub>3</sub> OD, 100 MHz).                          | S29  |

|                   |                                                                                                                                                                                                             |        |
|-------------------|-------------------------------------------------------------------------------------------------------------------------------------------------------------------------------------------------------------|--------|
| Figure S29        | EI-MS spectrum of compound <b>6</b> .                                                                                                                                                                       | S30    |
| Figure S30        | <sup>1</sup> H NMR spectrum of compound <b>6</b> (CDCl <sub>3</sub> , 400 MHz).                                                                                                                             | S31    |
| Figure S31        | EI-MS spectrum of compound <b>7</b> .                                                                                                                                                                       | S32    |
| Figure S32        | <sup>1</sup> H NMR spectrum of compound <b>7</b> (CD <sub>3</sub> OD, 400 MHz).                                                                                                                             | S33    |
| Figure S33        | <sup>13</sup> C NMR spectrum of compound <b>7</b> (CD <sub>3</sub> OD, 100 MHz).                                                                                                                            | S34    |
| Figure S34        | Structures of gardenifolins A, C, E, and G and their respective mirror images gardenifolins B, D, F, and H.                                                                                                 | S35    |
|                   | Spectroscopic data of the isolated known compounds <b>2–7</b> .                                                                                                                                             | S36–37 |
| Figure S35        | Dose-response curve of the anti-AChE assay of compound <b>1</b>                                                                                                                                             | S38    |
| Figure S36        | Dose-response curve of the anti-AChE assay of compound <b>2</b>                                                                                                                                             | S39    |
| Figure S37        | Dose-response curve of the anti-AChE assay of compound <b>3</b>                                                                                                                                             | S40    |
| Figure S38        | Dose-response curve of the anti-AChE assay of compound <b>4</b>                                                                                                                                             | S41    |
| Figure S39        | Dose-response curve of the anti-AChE assay of compound <b>5</b>                                                                                                                                             | S42    |
| Figure S40:       | The overlay of donepezil with compounds <b>3</b> (A) and <b>4</b> (B).                                                                                                                                      | S43    |
| Table S1.         | <sup>1</sup> H and <sup>13</sup> C NMR spectral data of compound <b>1</b> (CD <sub>3</sub> OD, 500 and 125 MHz, respectively) and pinoresinol ( <b>2</b> ) (CDCl <sub>3</sub> , 400 and 100, respectively). | S44    |
| Table S2.         | Chemical shift differences of H <sub>2</sub> -9 and H <sub>2</sub> -9' ( $\Delta\delta$ H-9 and $\Delta\delta$ H-9') of compounds <b>1–5</b> .                                                              | S45    |
| <b>References</b> |                                                                                                                                                                                                             | S44    |

**List of abbreviation:**

ACh: acetylcholine

AChE: acetyl cholinesterase

AD: Alzheimer's disease

ARG: arginine

CC: column chromatography

CNS: central nervous system

DCM: dichloromethane

DMSO: dimethyl sulphoxide

DTNB: 5,5-dithiobis-2-nitrobenzoic acid

EtOAc: ethyl acetate

GLY: glycine

HFB4: normal melanocytes cell line

LYS: lysine

MeOH: methanol

NMDA: N-methyl-D-aspartate

OD: optical density

PHE: phenylalanine

RPE: retinal pigment epithelial

SABC: streptavidin conjugated to Horseradish peroxidase

SER: serine

TERT: telomerase reverse transcriptase

TMB: 3,3',5,5' - tetramethylbenzidine

VLC: vacuum liquid chromatography

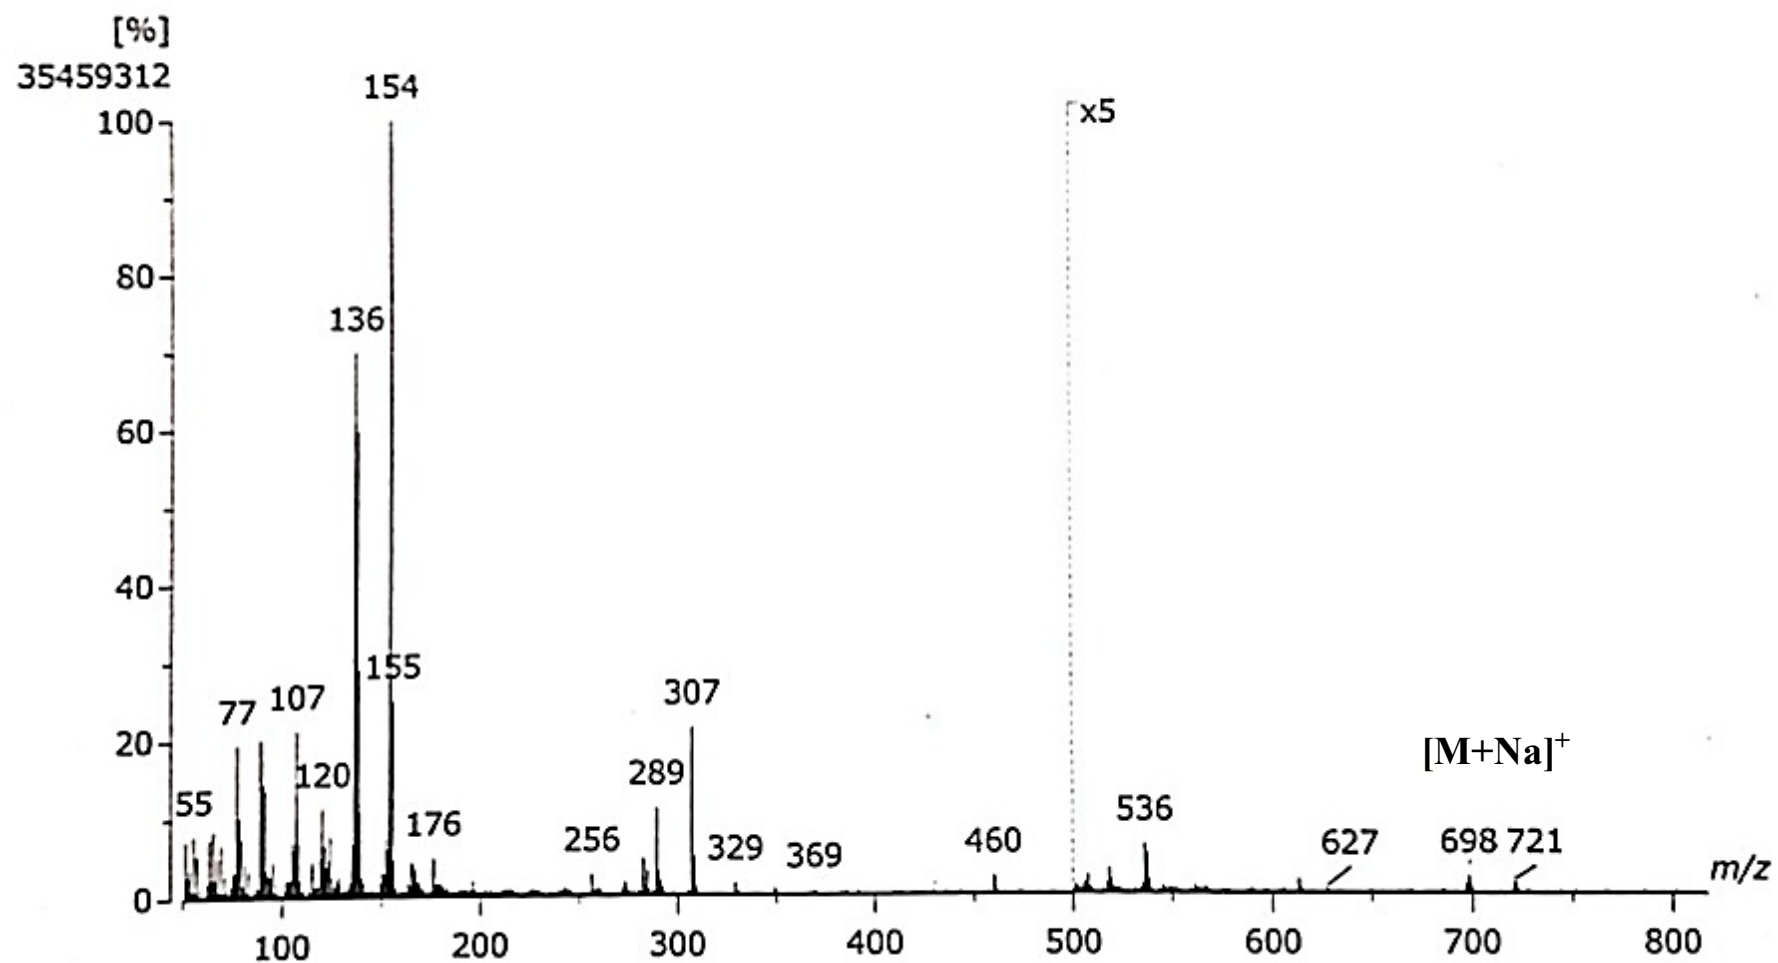

Figure S1. Positive FAB-MS spectrum of compound 1

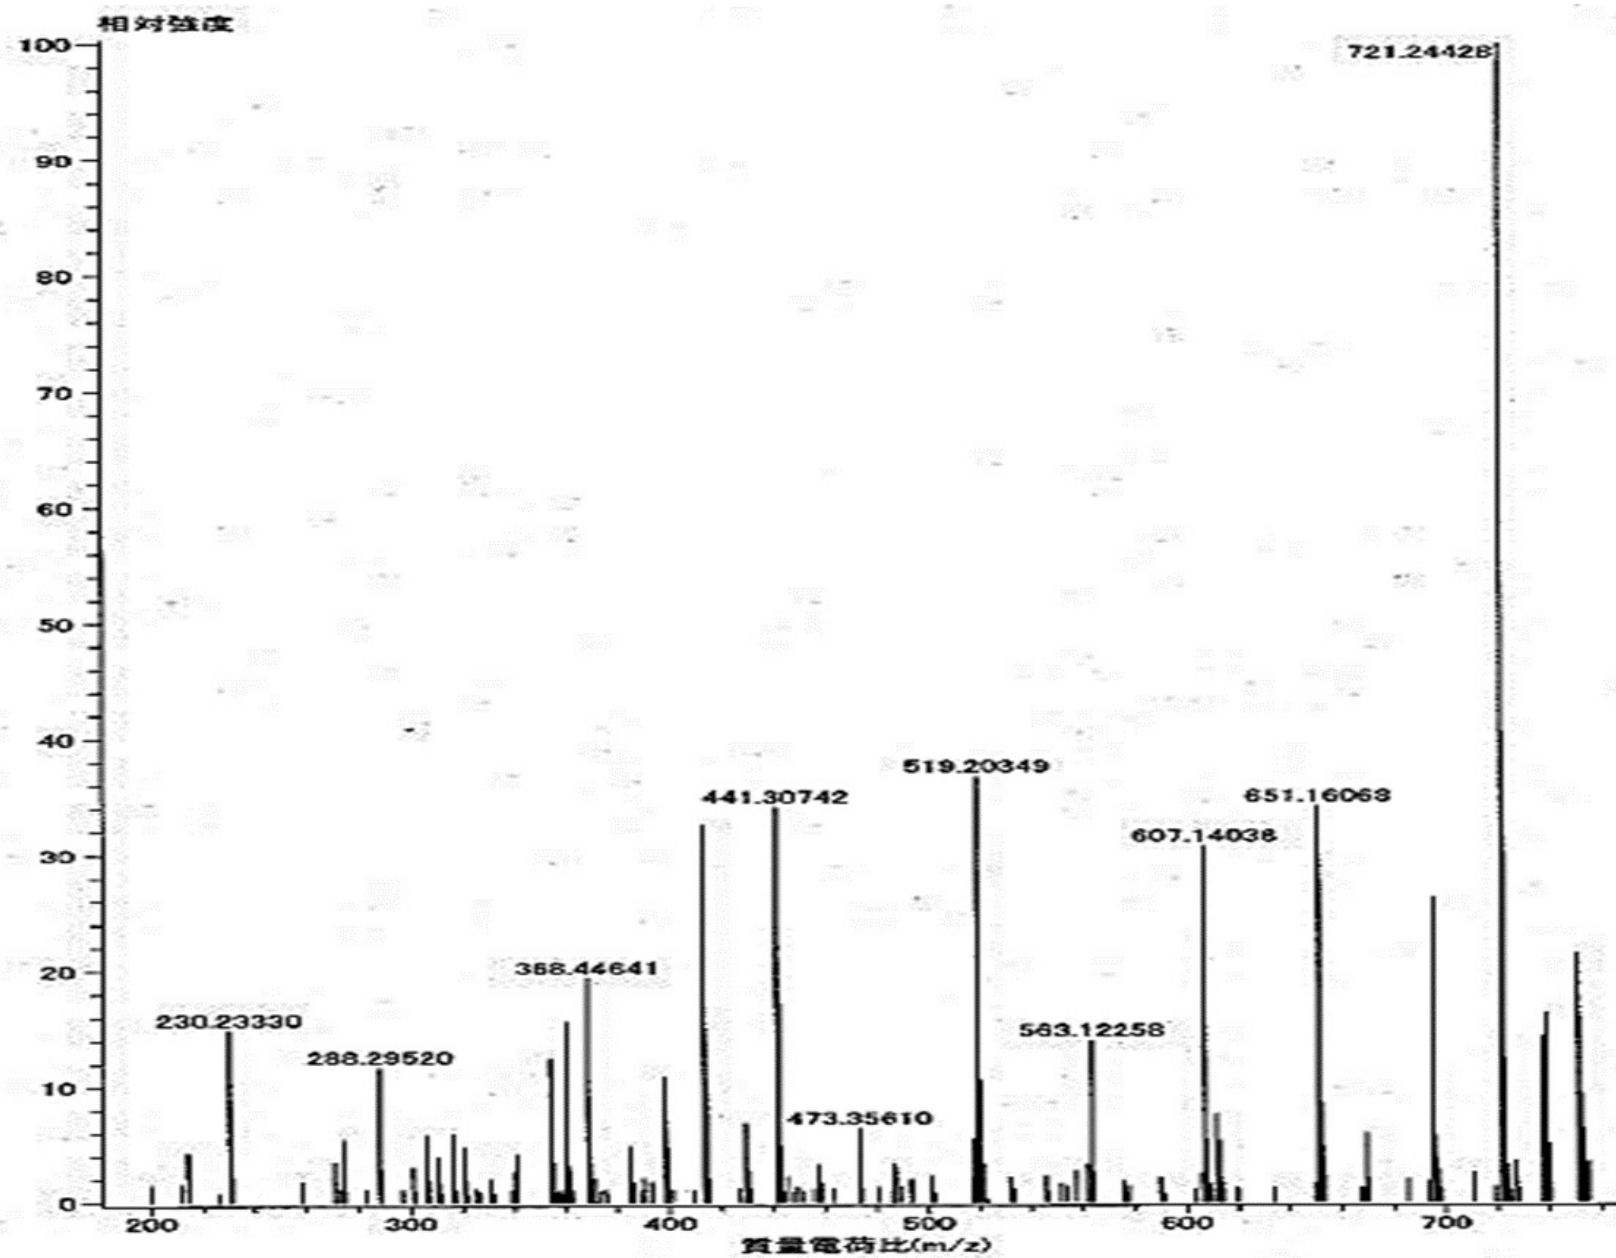

Figure S2. Positive HRESIMS spectrum of compound 1

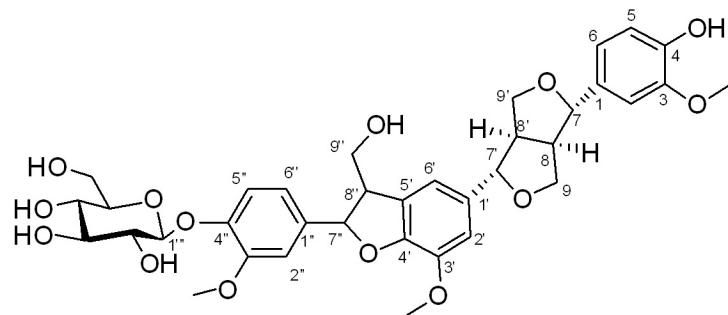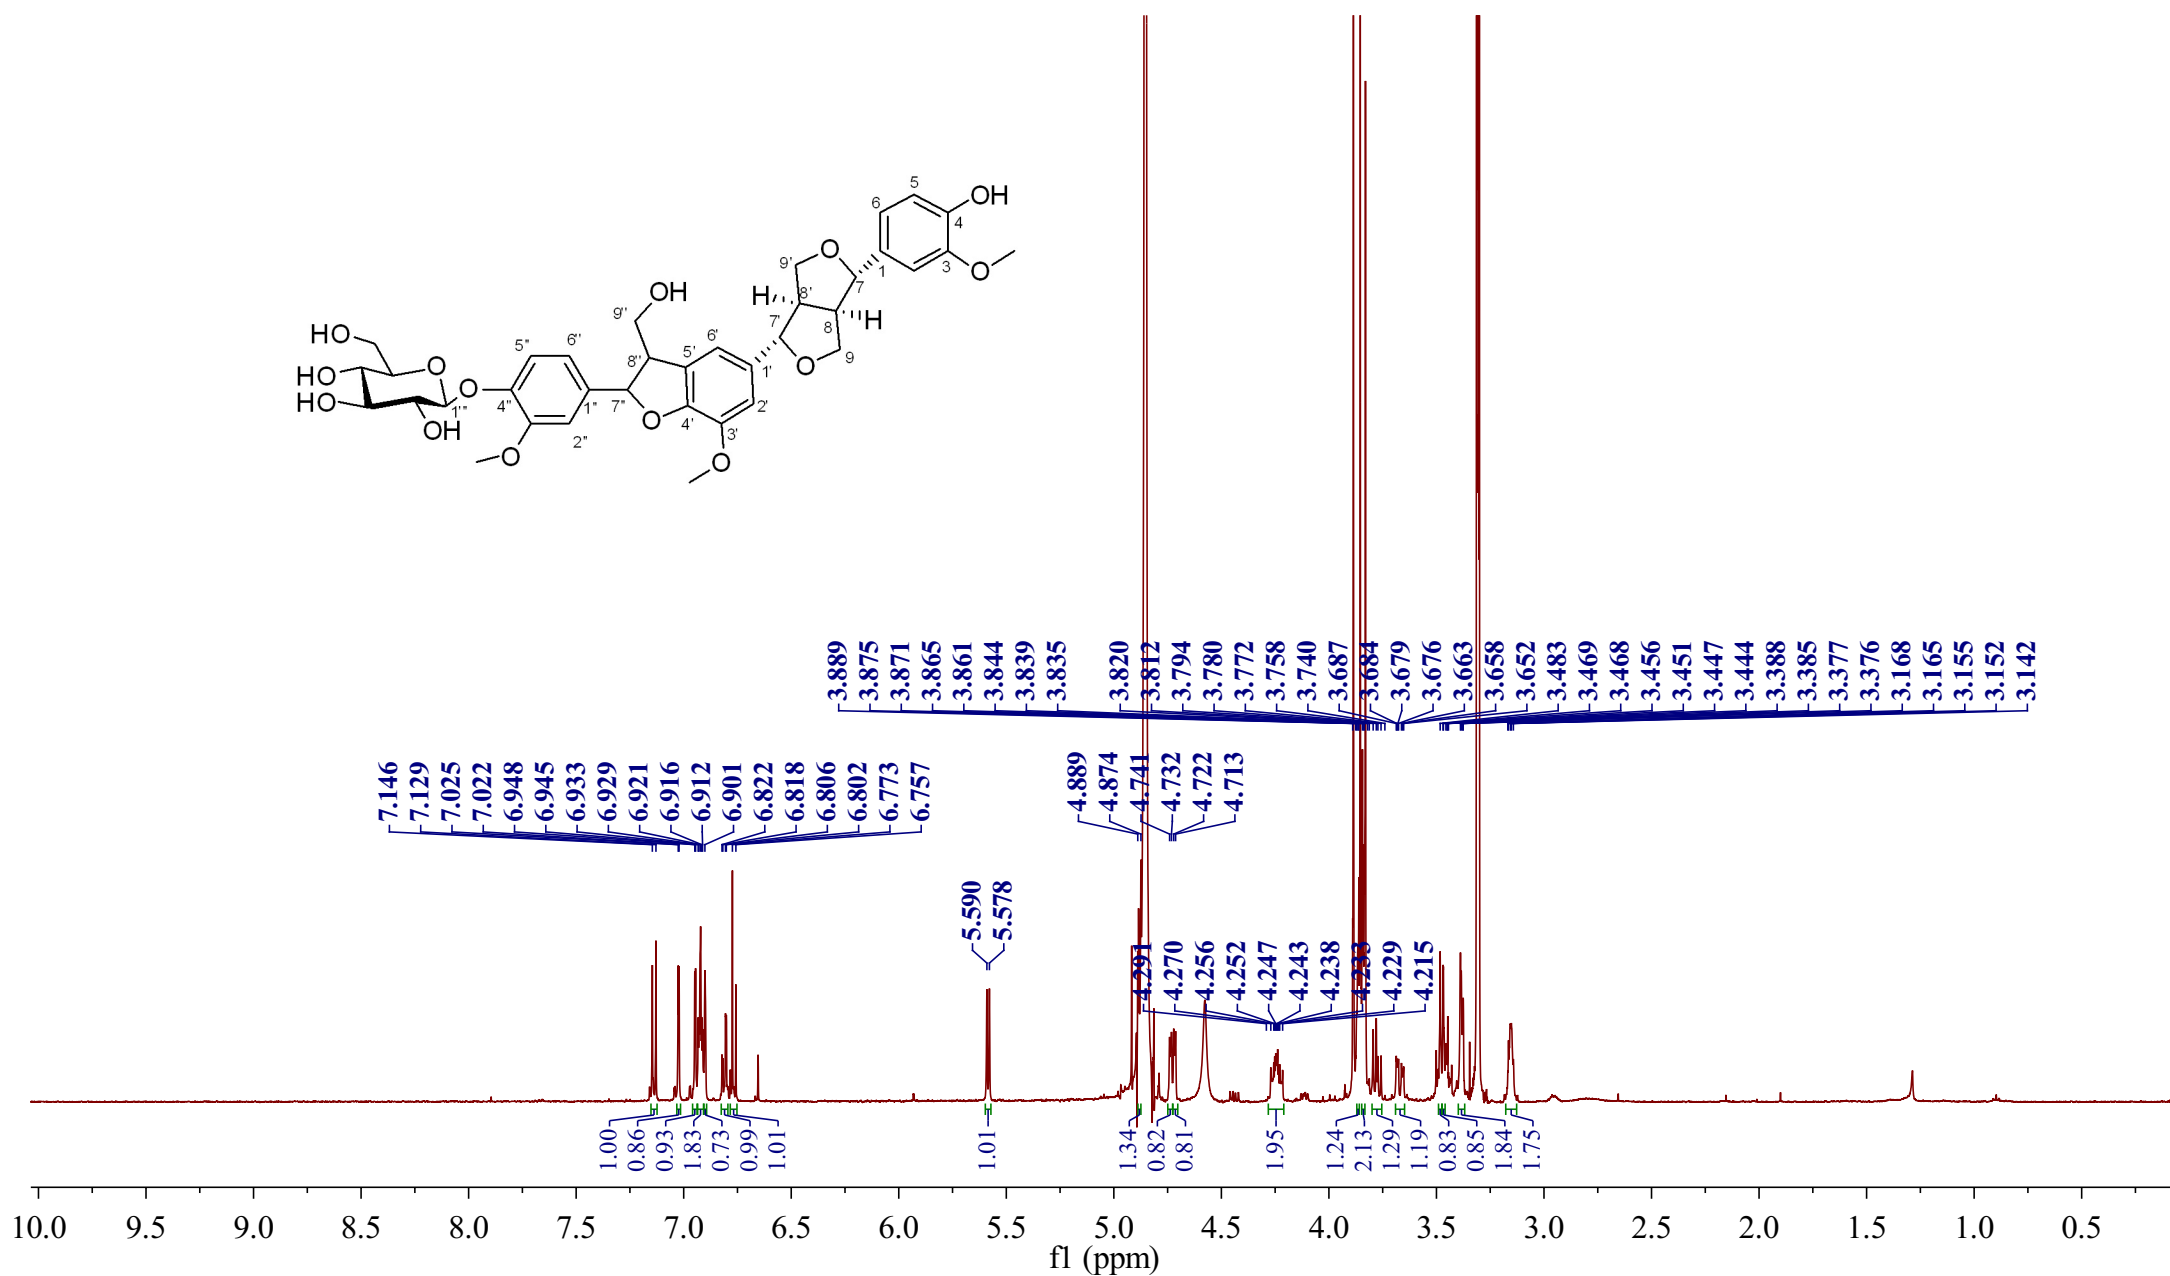

Figure S3.  $^1\text{H}$  NMR spectrum of compound 1 ( $\text{CD}_3\text{OD}$ , 500 MHz)

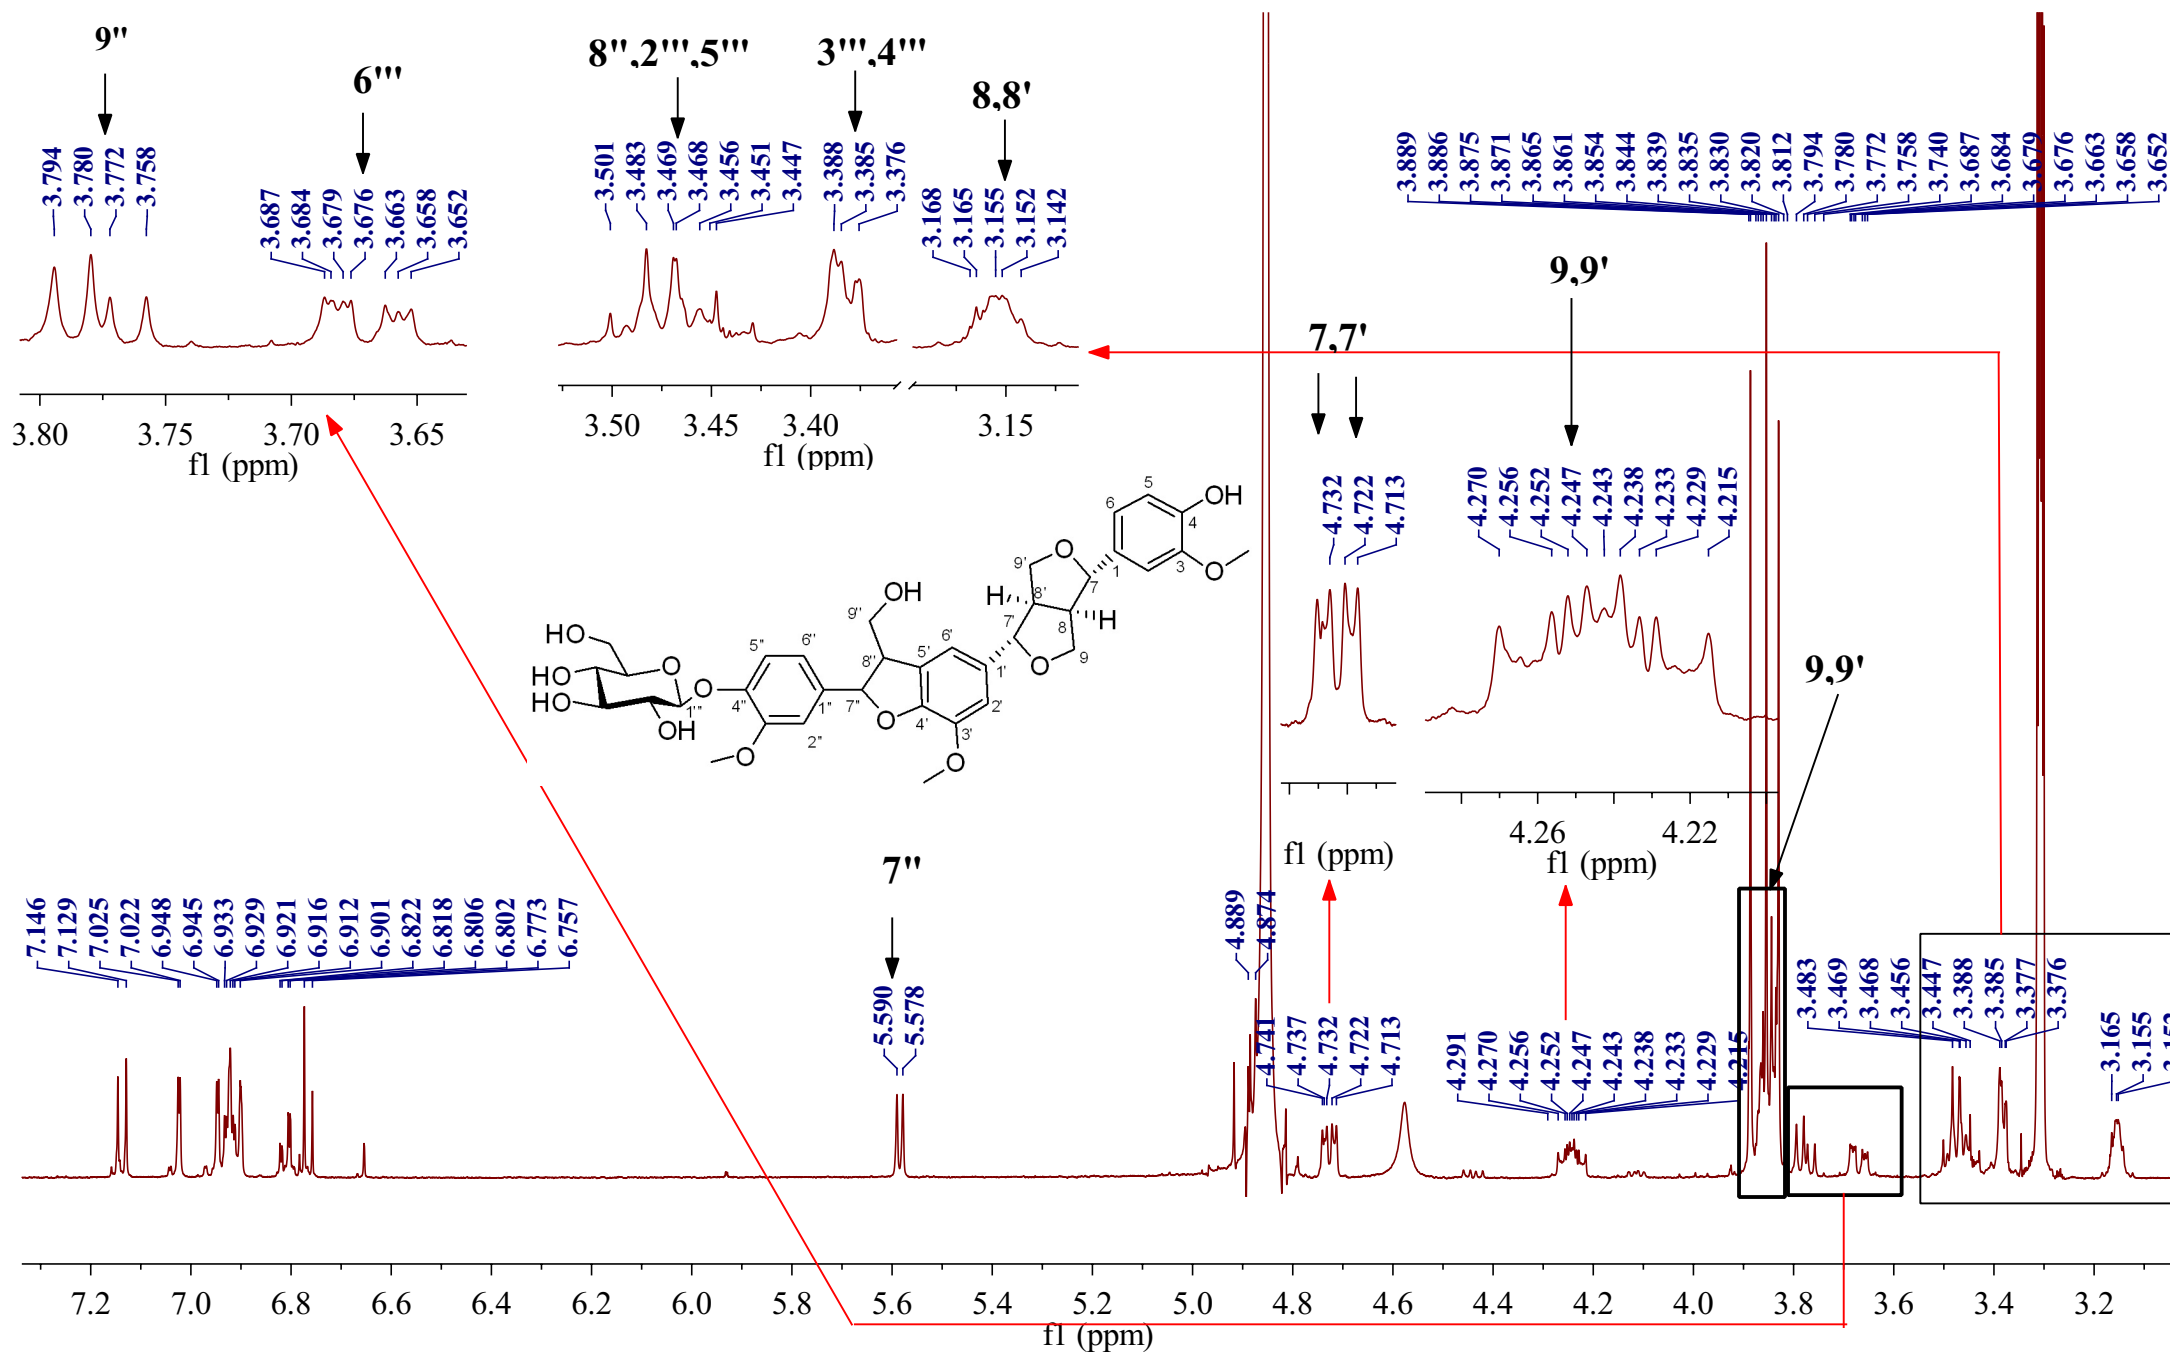

**Figure S4. Expanded  $^1\text{H}$  NMR spectrum of compound 1 ( $\text{CD}_3\text{OD}$ , 500 MHz)**



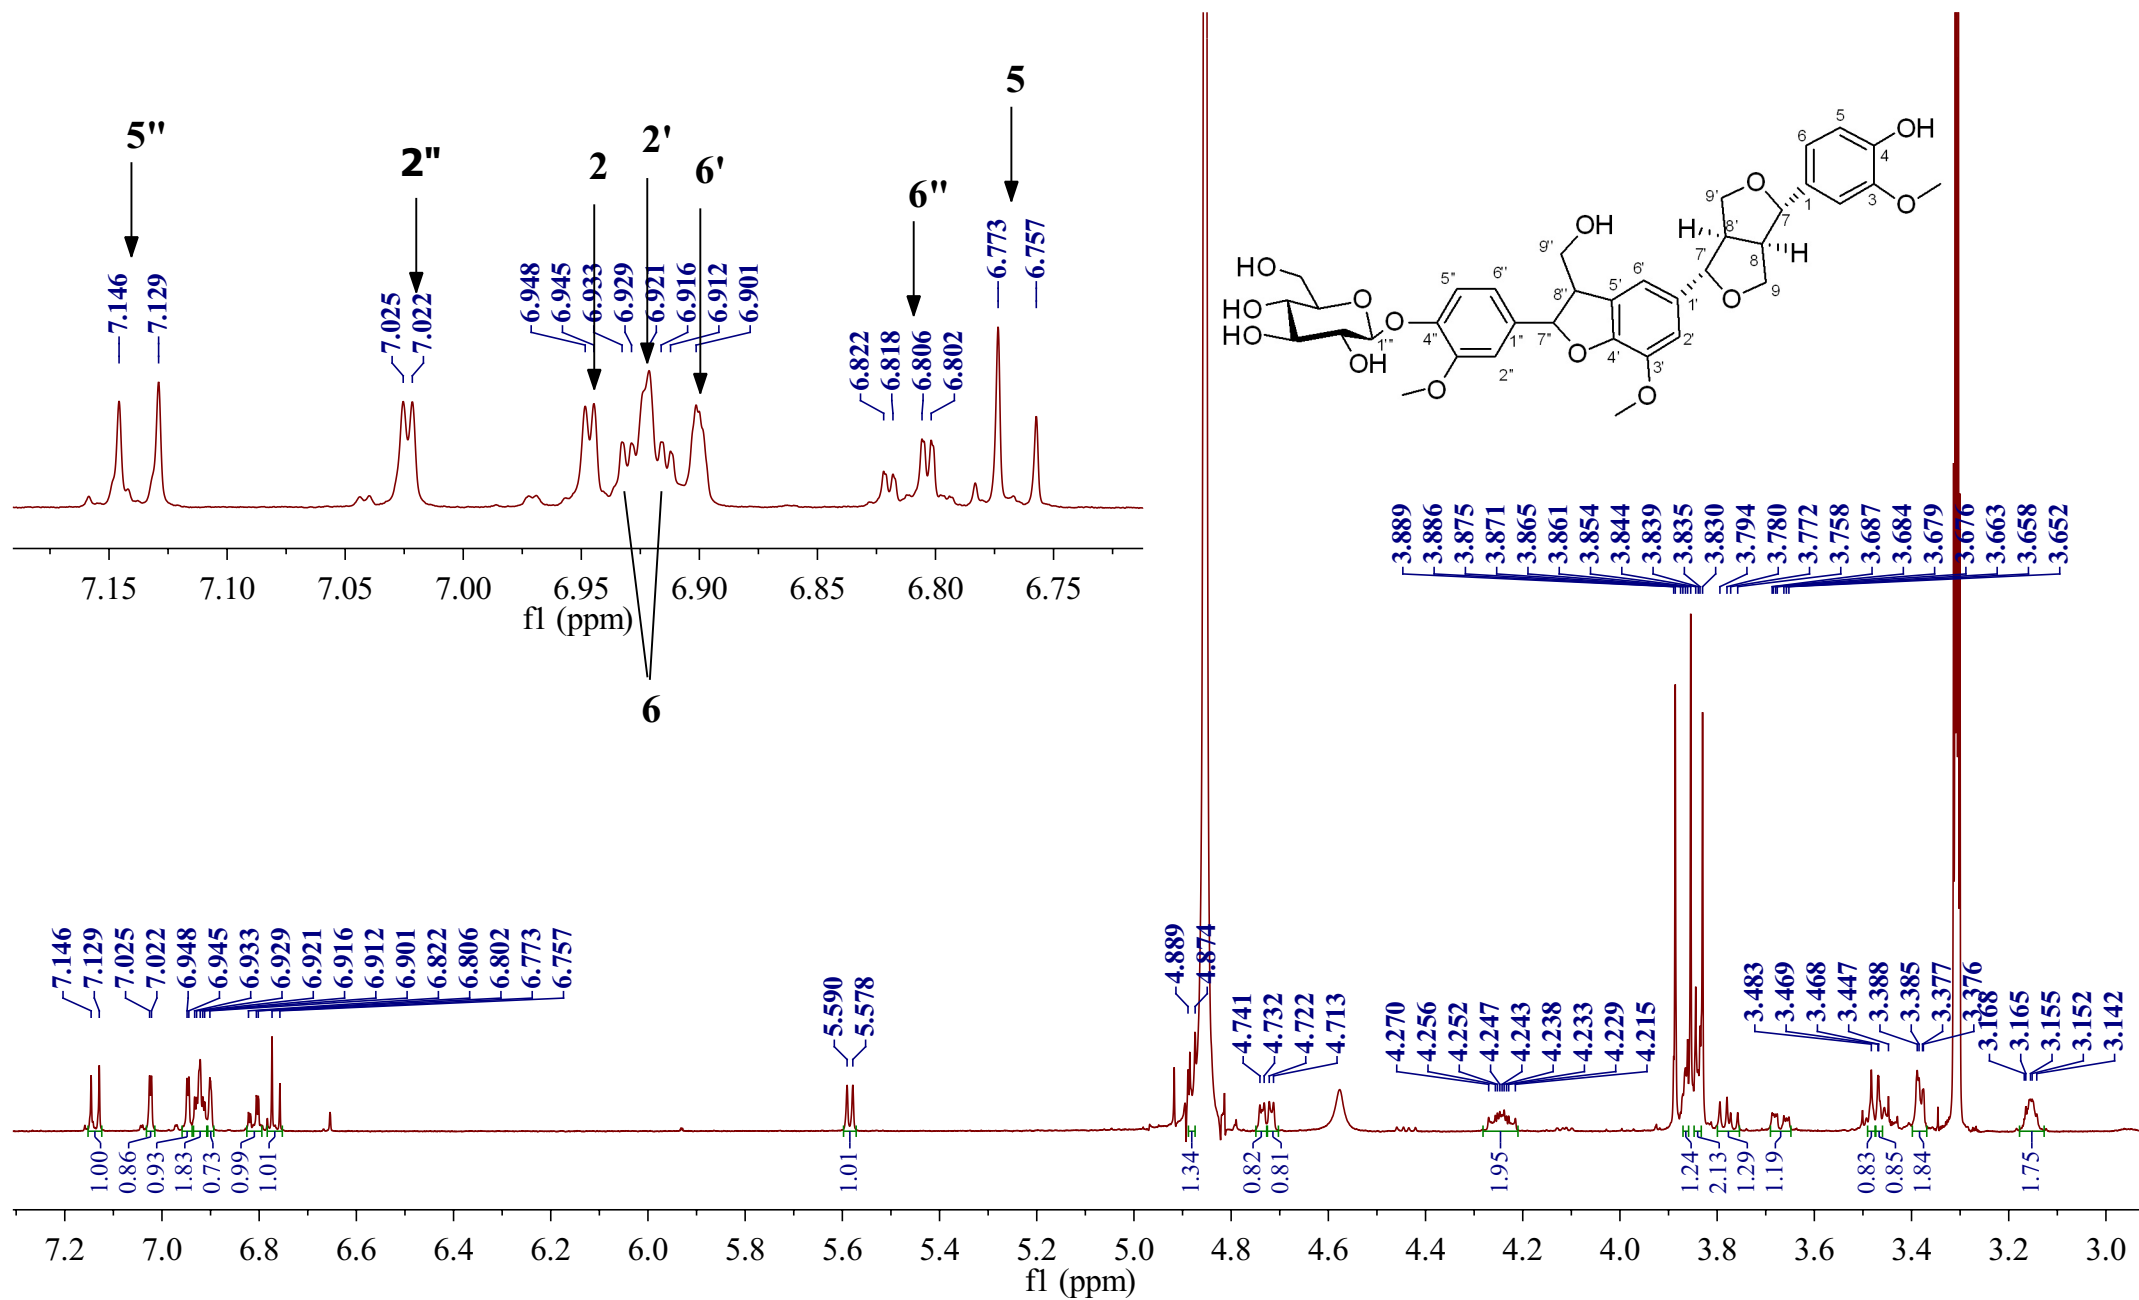

Figure S5. Expanded  $^1\text{H}$  NMR spectrum of compound 1 ( $\text{CD}_3\text{OD}$ , 500 MHz)

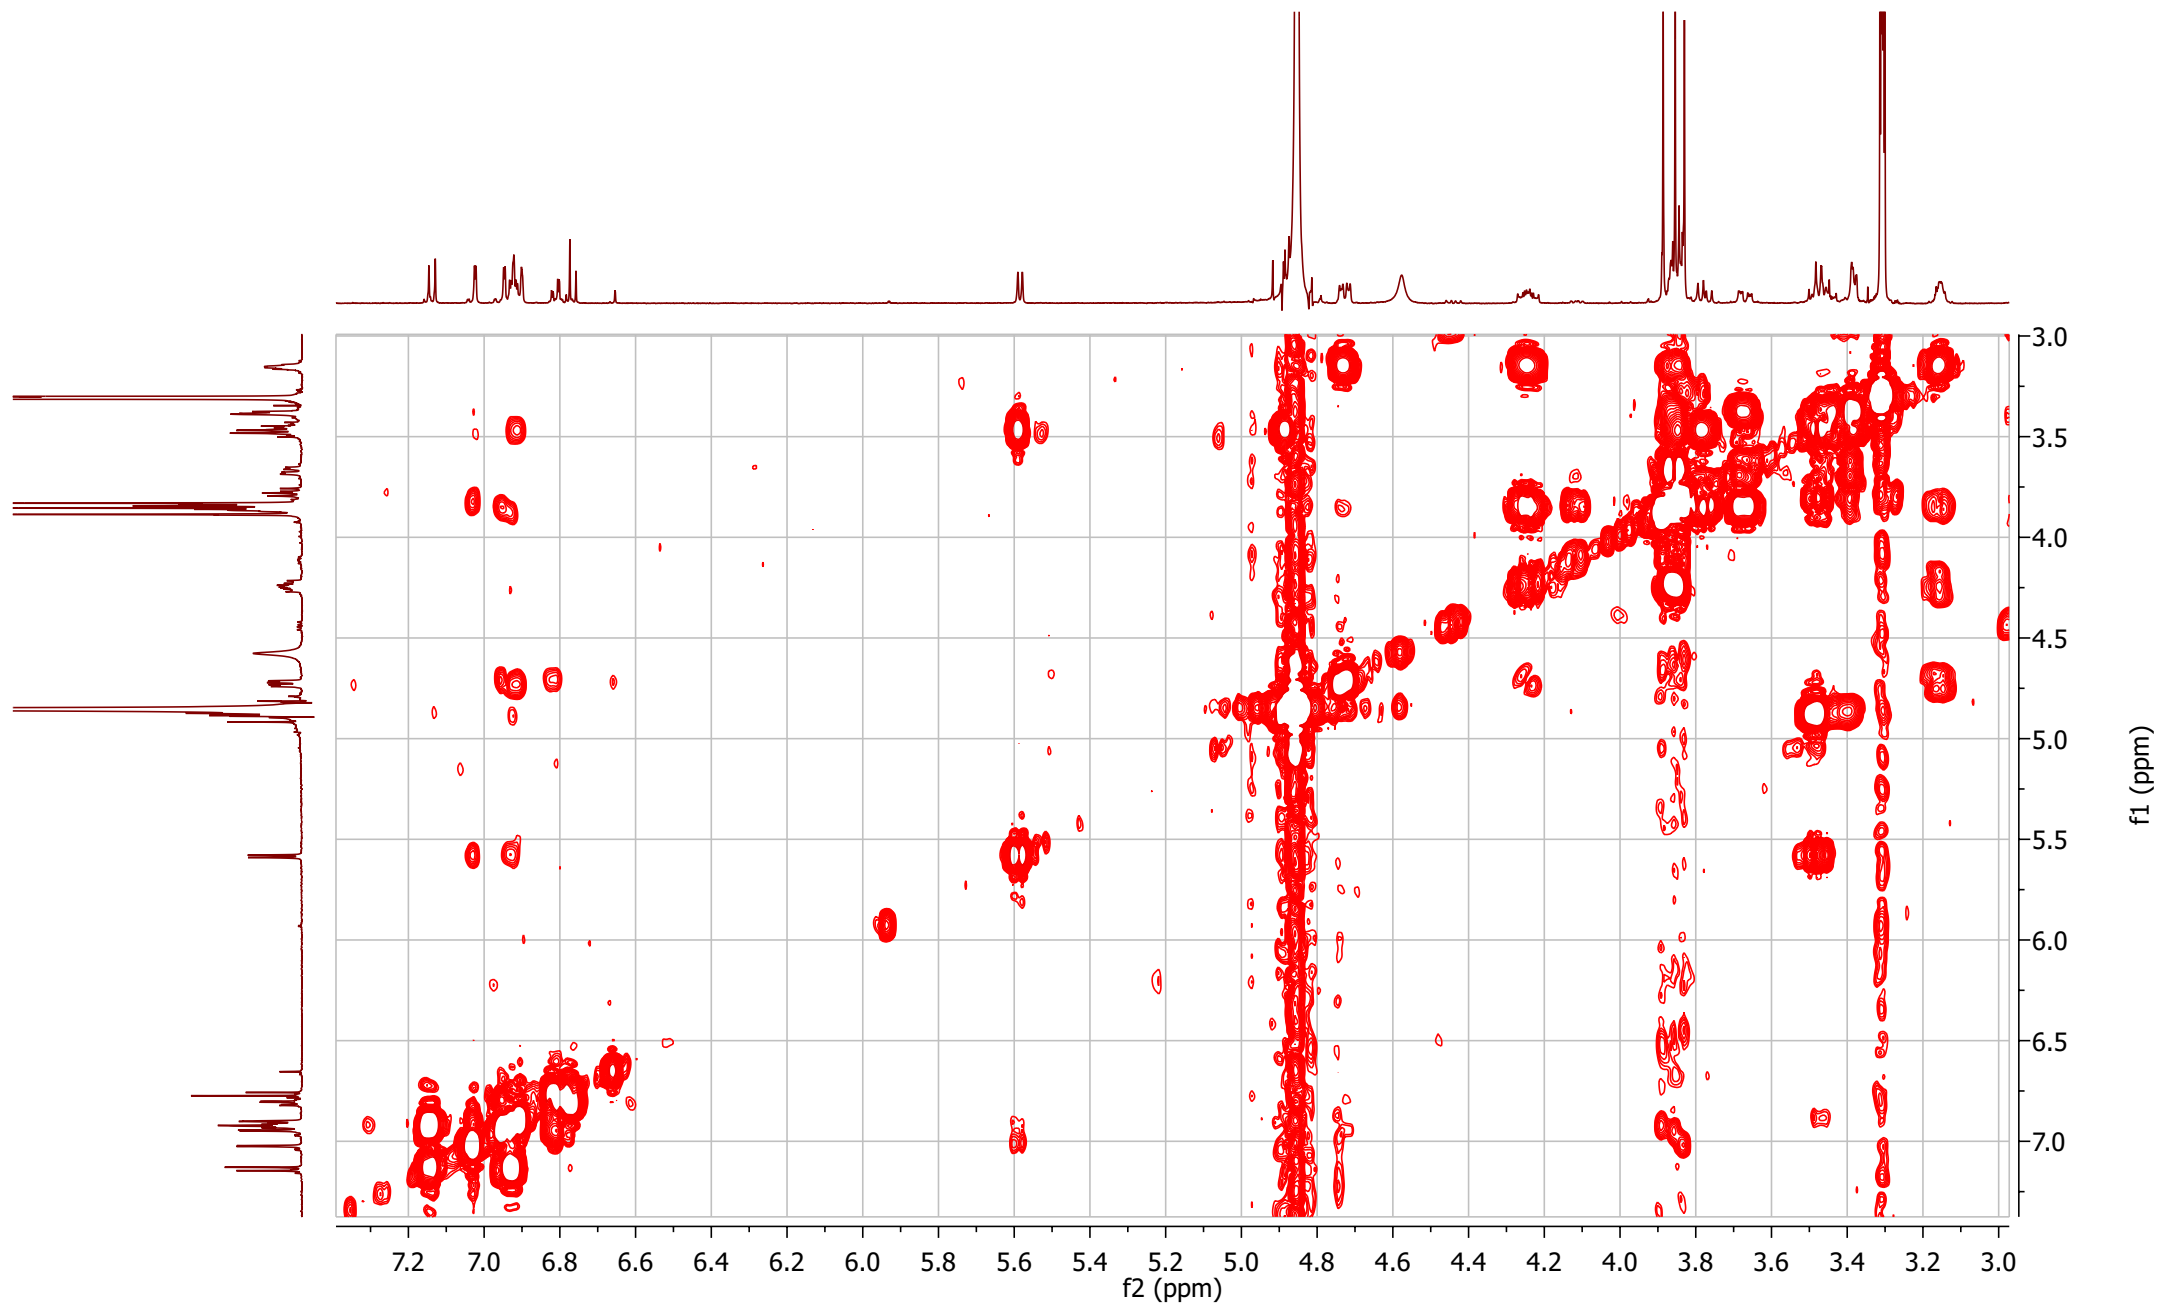

**Figure S6.  $^1\text{H}$ - $^1\text{H}$  COSY spectrum of compound 1 ( $\text{CD}_3\text{OD}$ , 500 MHz)**

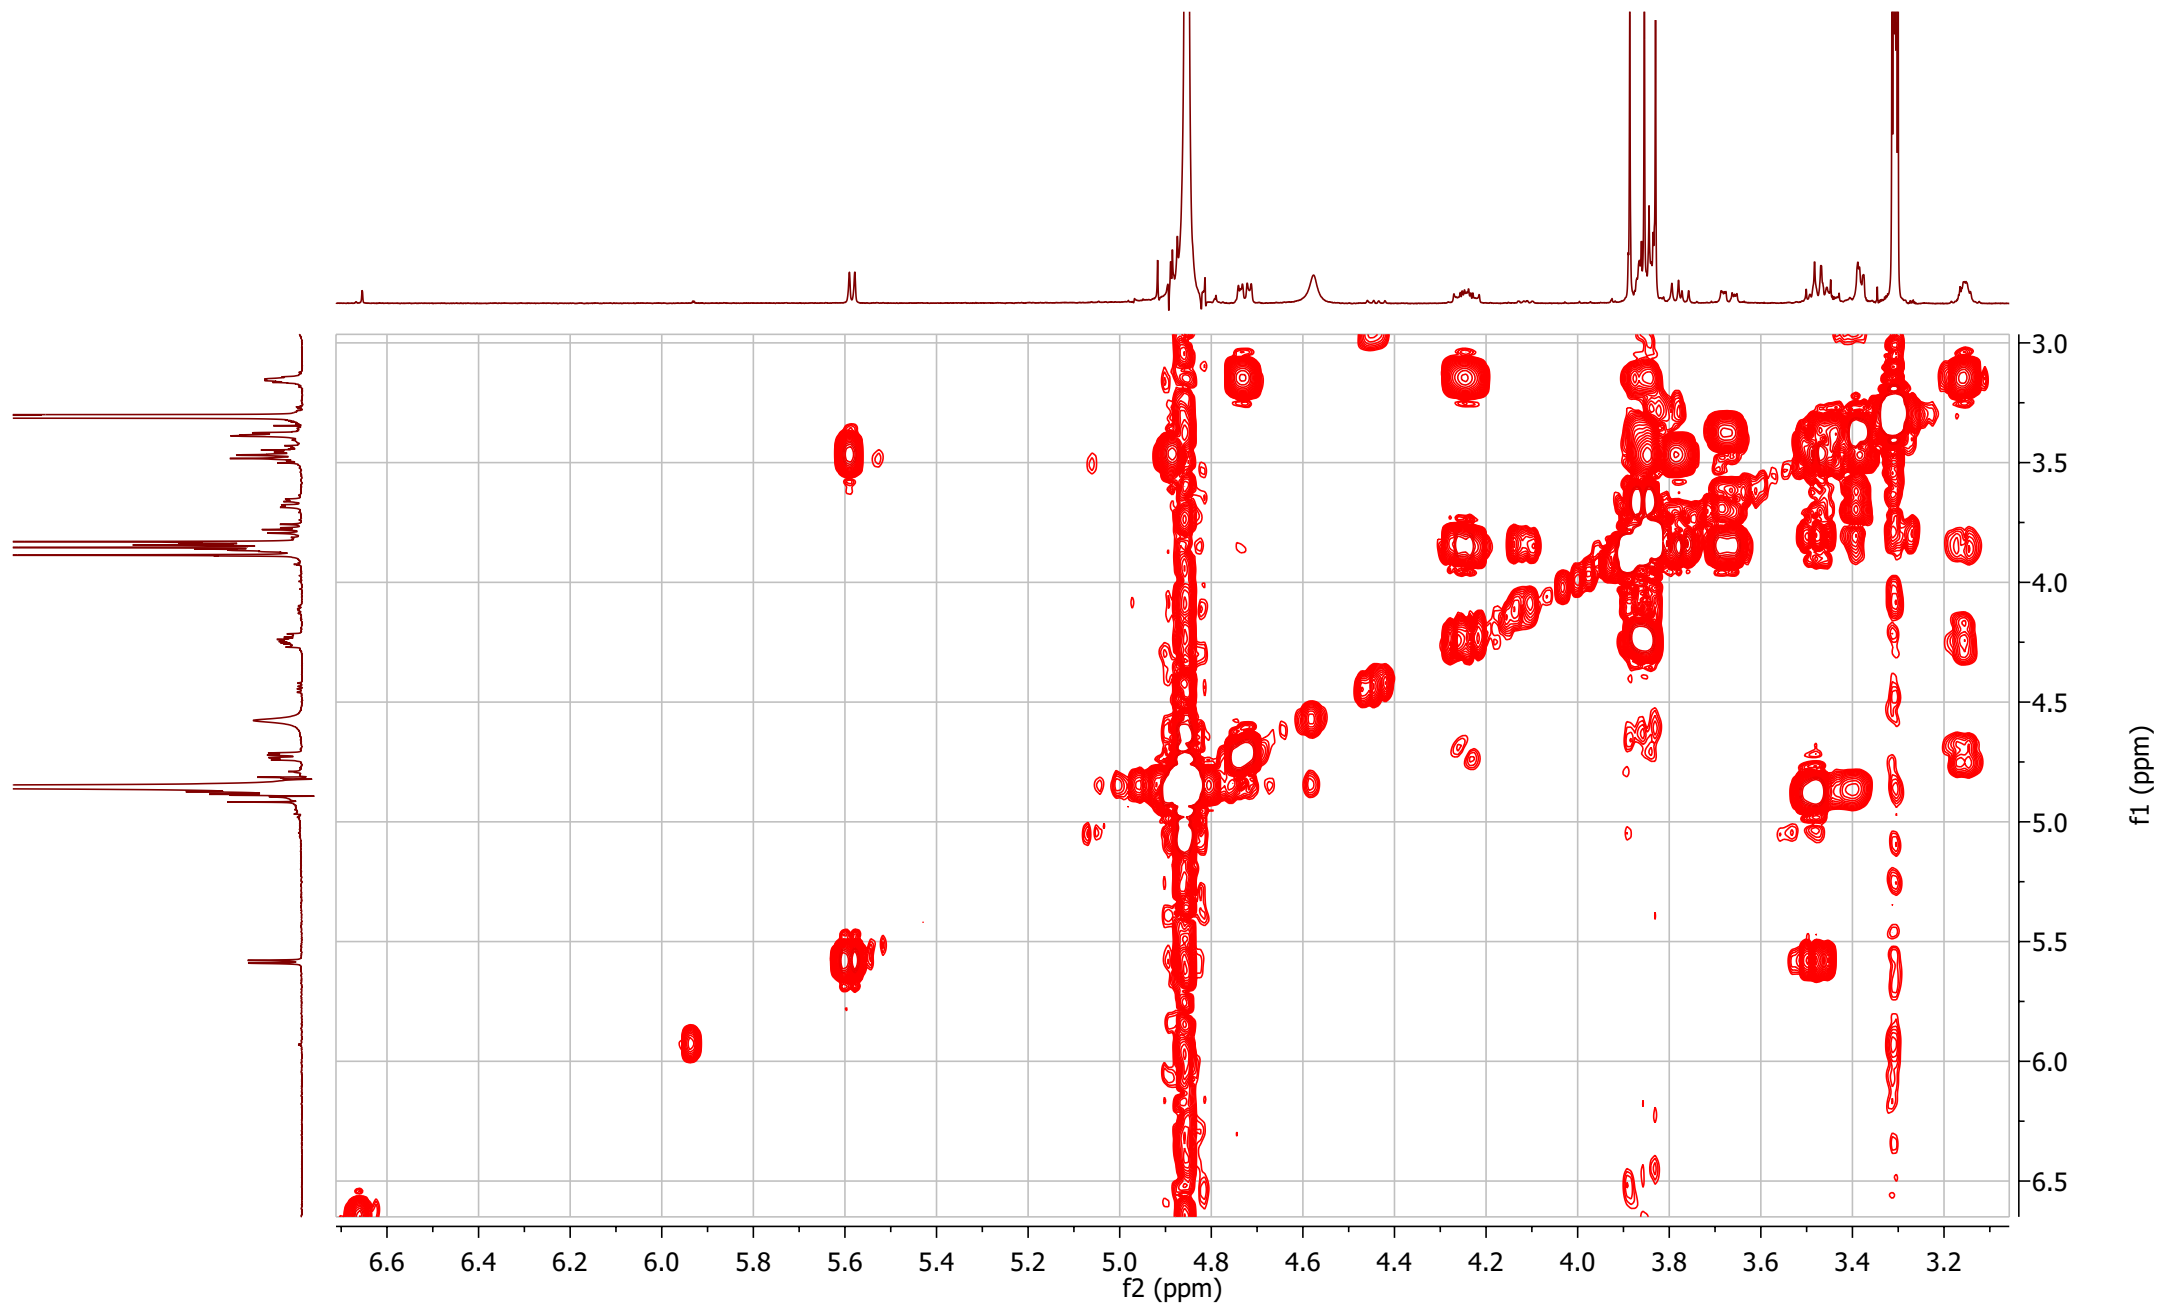

**Figure S7. Expanded  $^1\text{H}$ - $^1\text{H}$  COSY spectrum of compound 1 ( $\text{CD}_3\text{OD}$ , 500 MHz)**

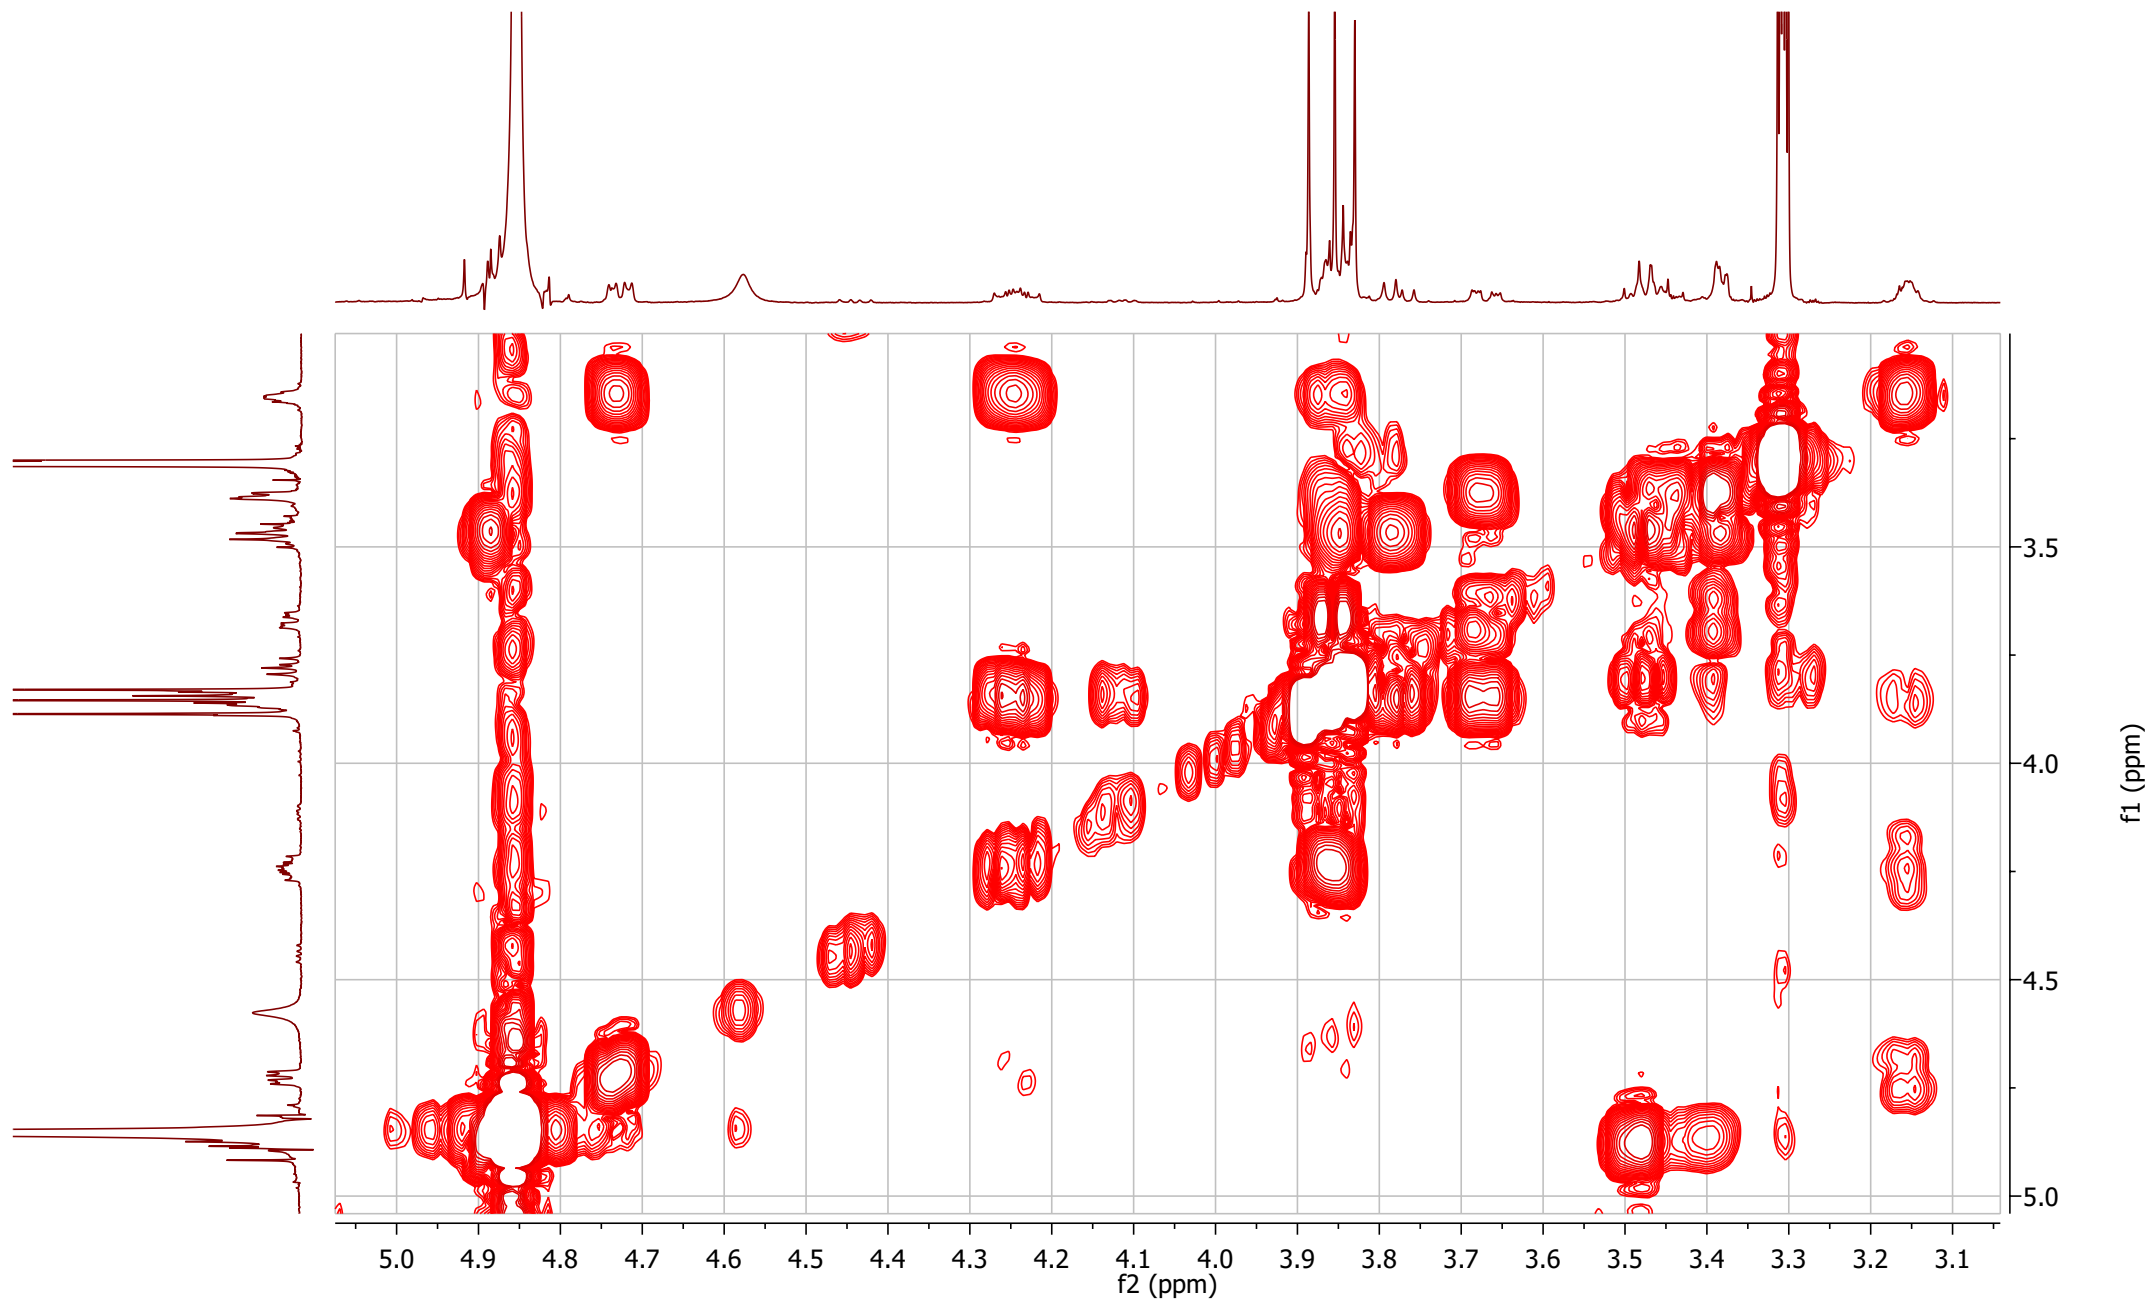

**Figure S8. Expanded  $^1\text{H}$ - $^1\text{H}$  COSY spectrum of compound 1 ( $\text{CD}_3\text{OD}$ , 500 MHz)**

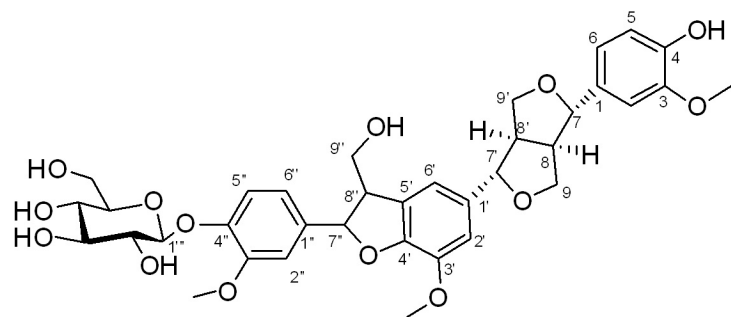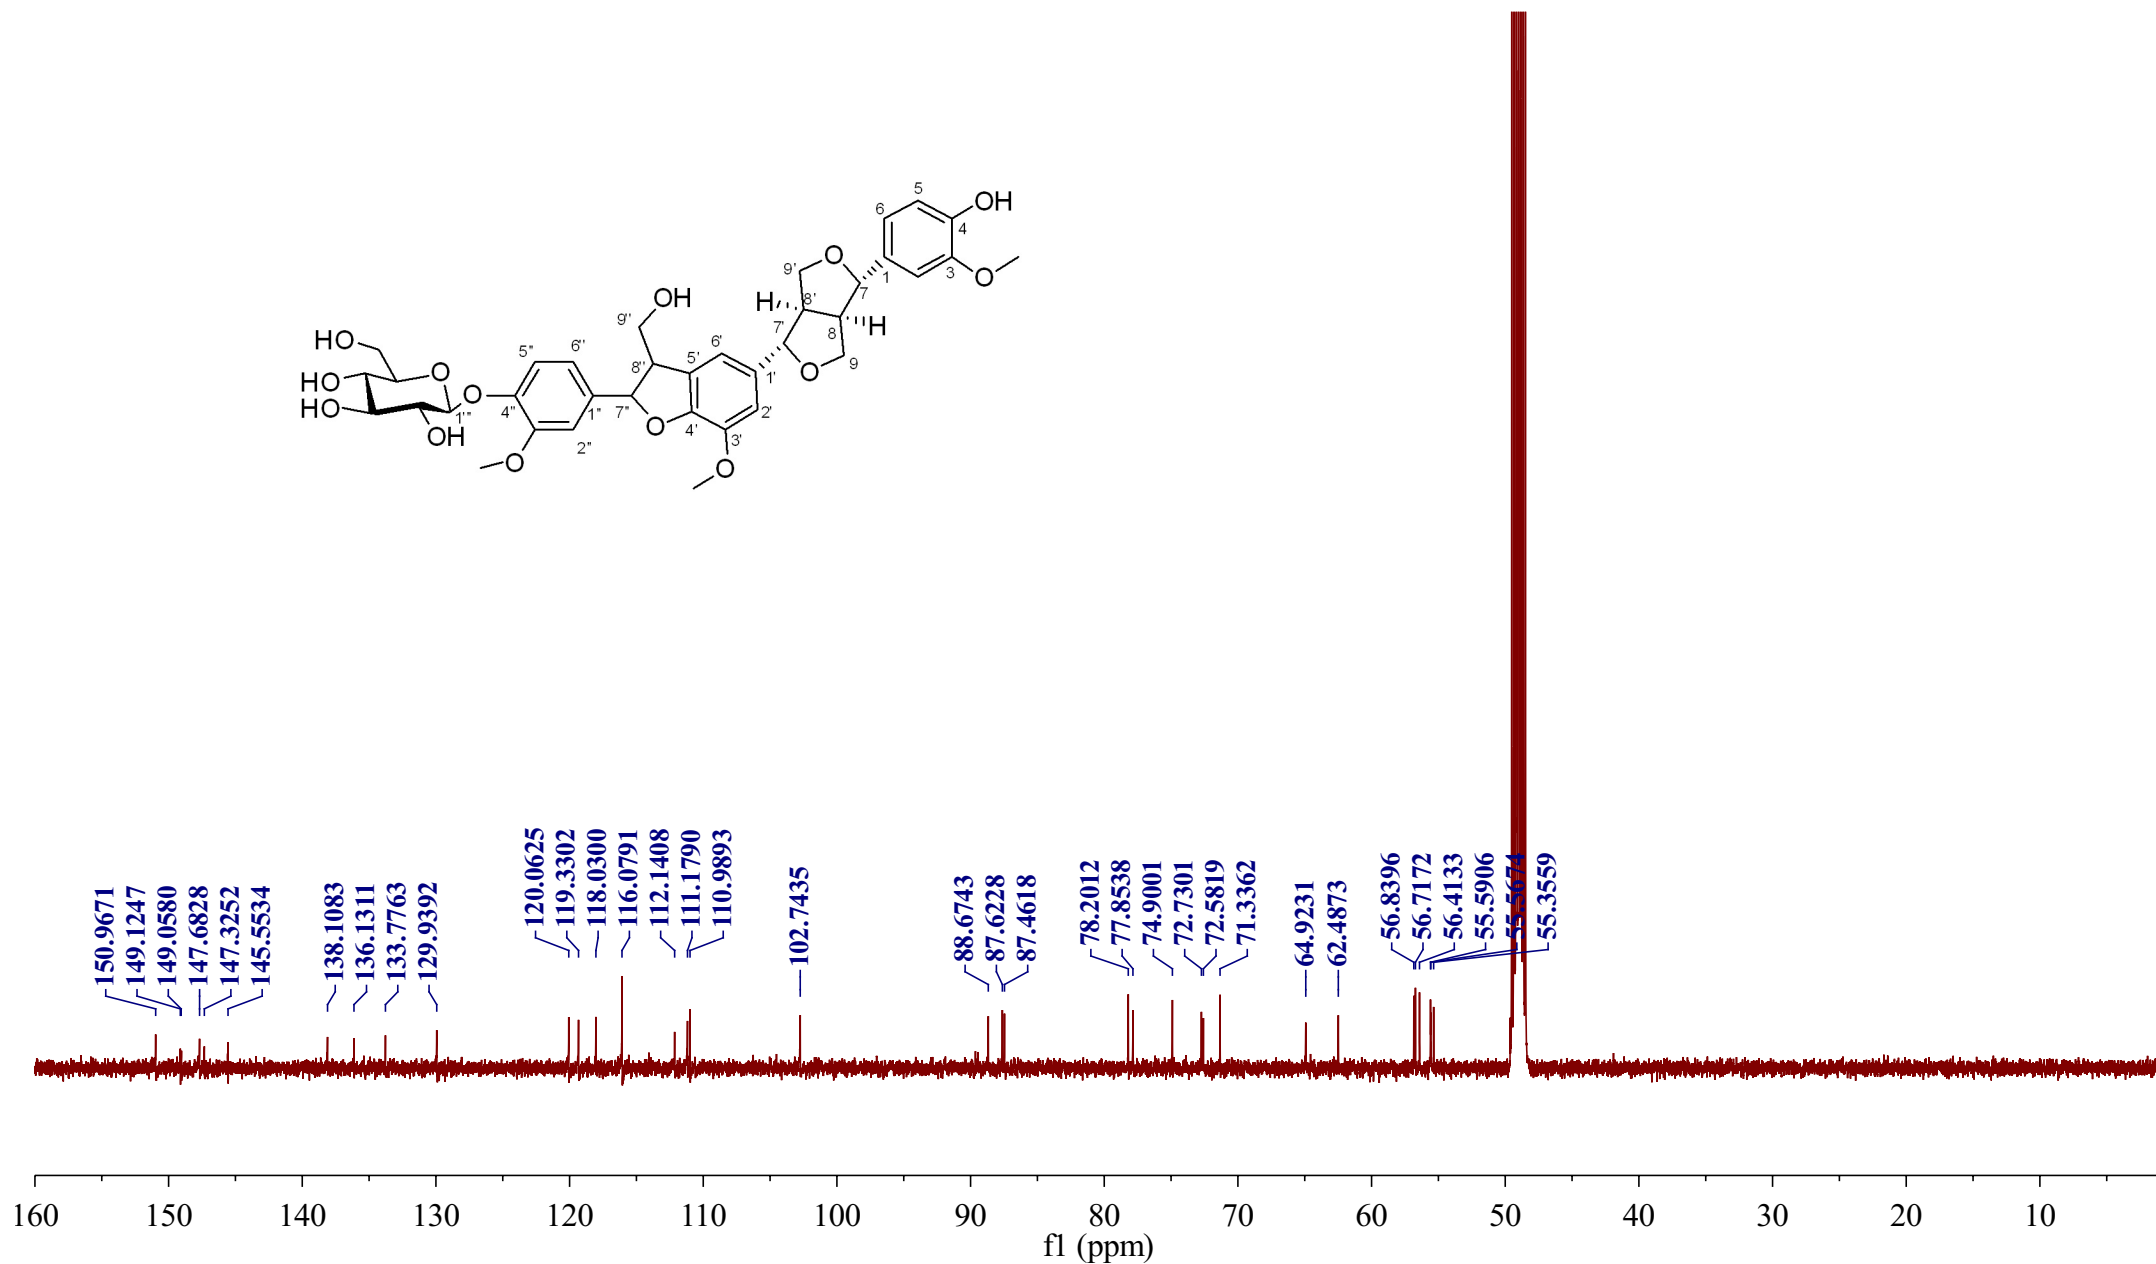

Figure S9.  $^{13}\text{C}$ NMR spectrum of compound 1 (CD<sub>3</sub>OD, 125 MHz)

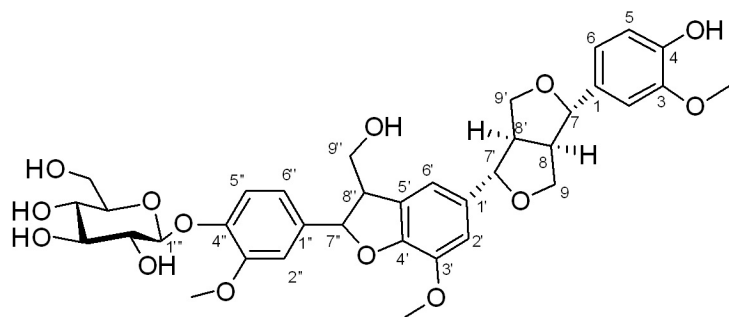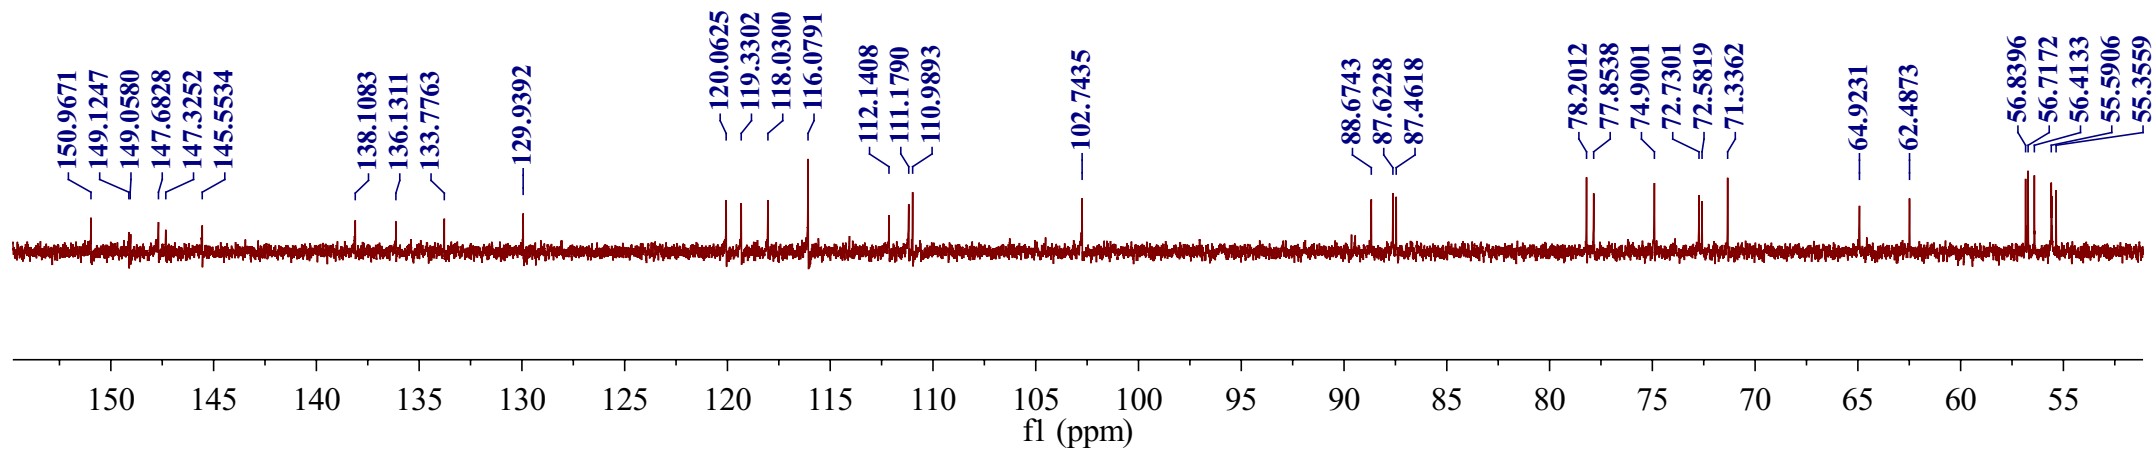

Figure S10. Expanded  $^{13}\text{C}$ NMR spectrum of compound 1 ( $\text{CD}_3\text{OD}$ , 125 MHz)

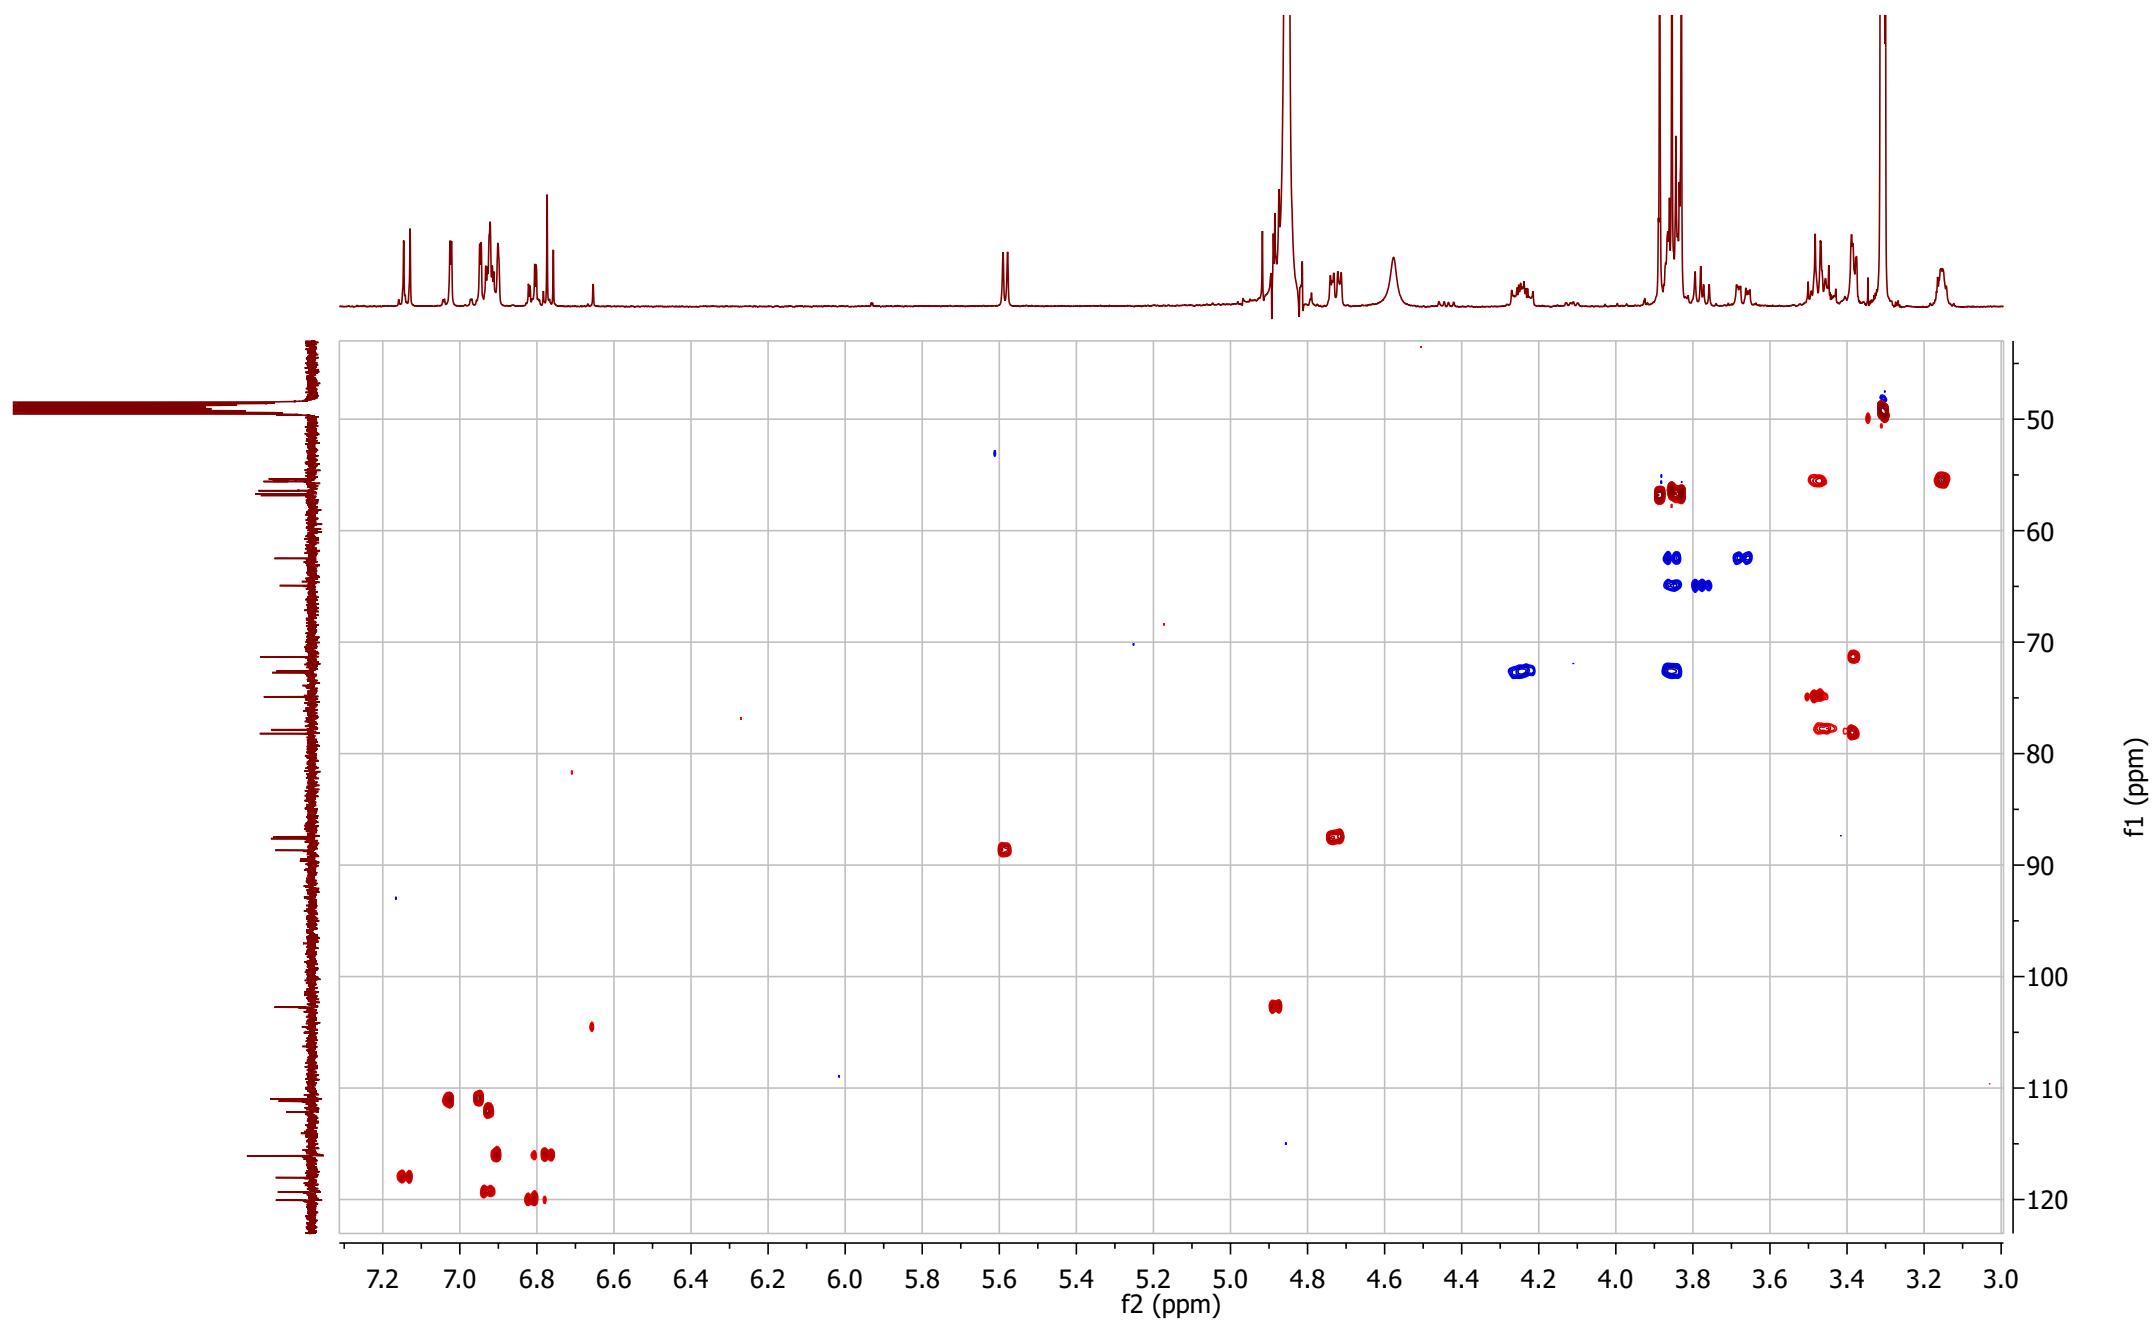

**Figure S11. HSQC spectrum of compound 1**

**S12**

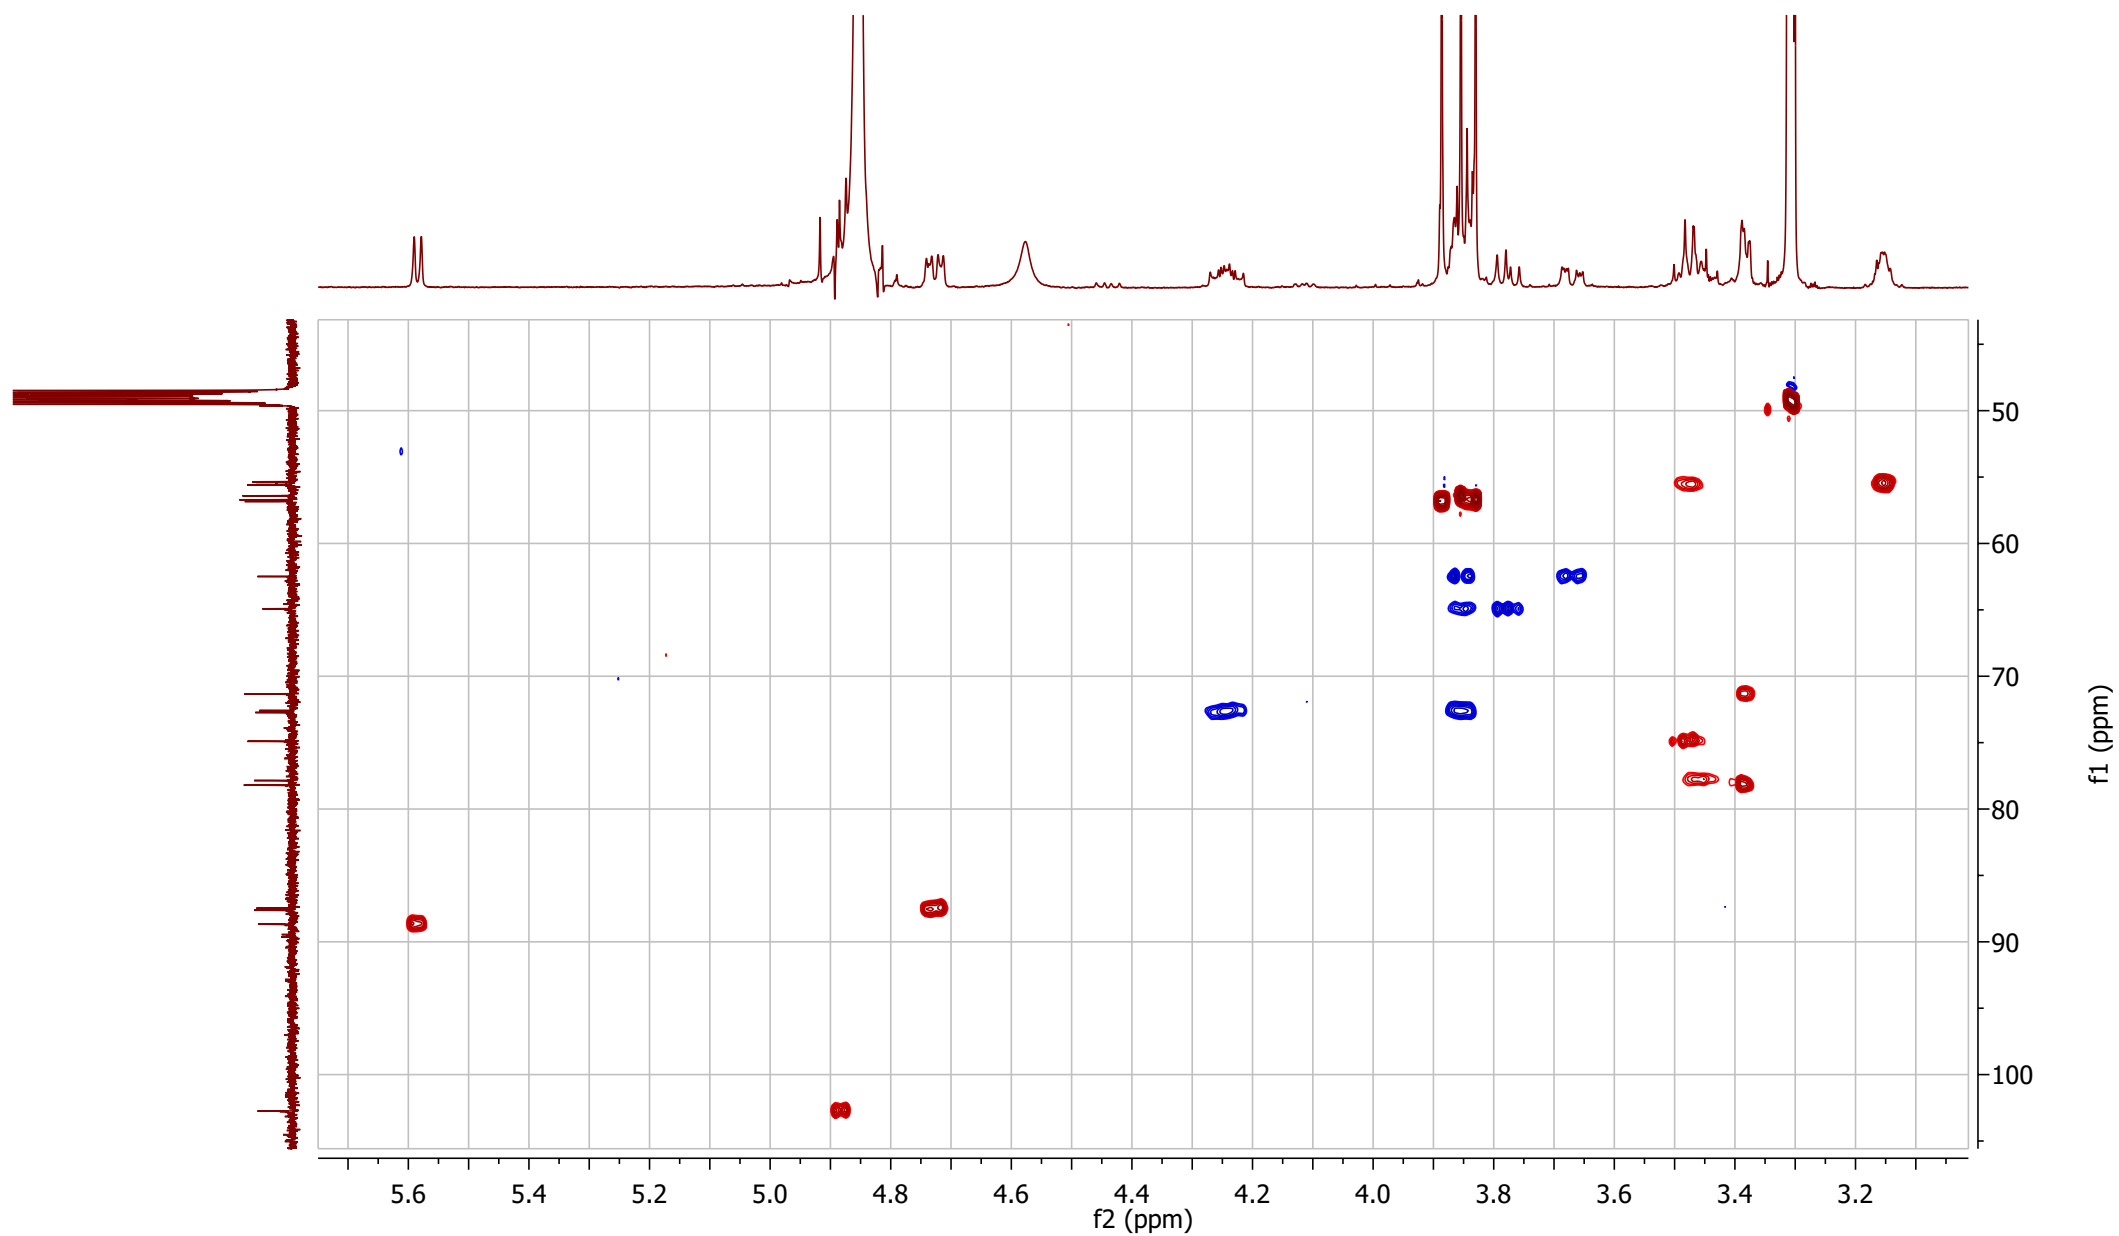

**Figure S12. Expanded HSQC spectrum of compound 1**



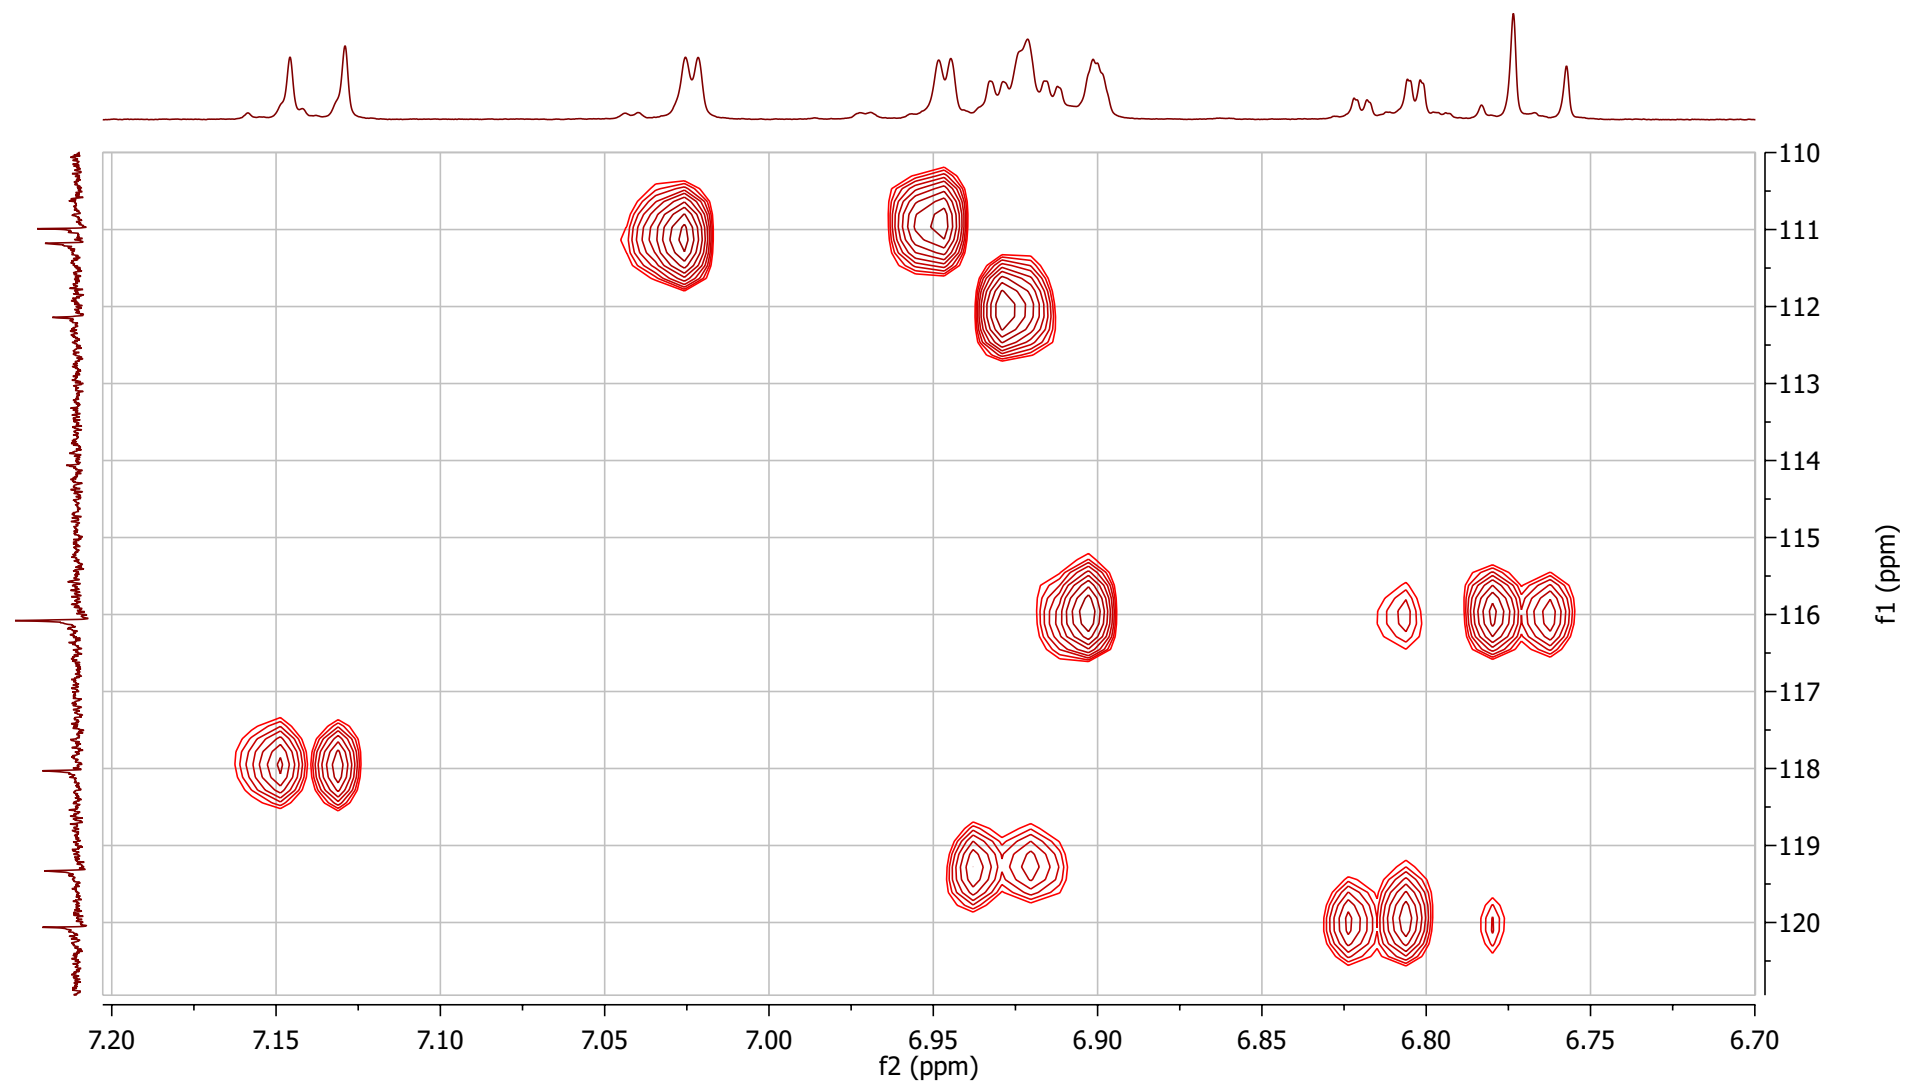

**Figure S13. Expanded HSQC spectrum of compound 1**

**S14**

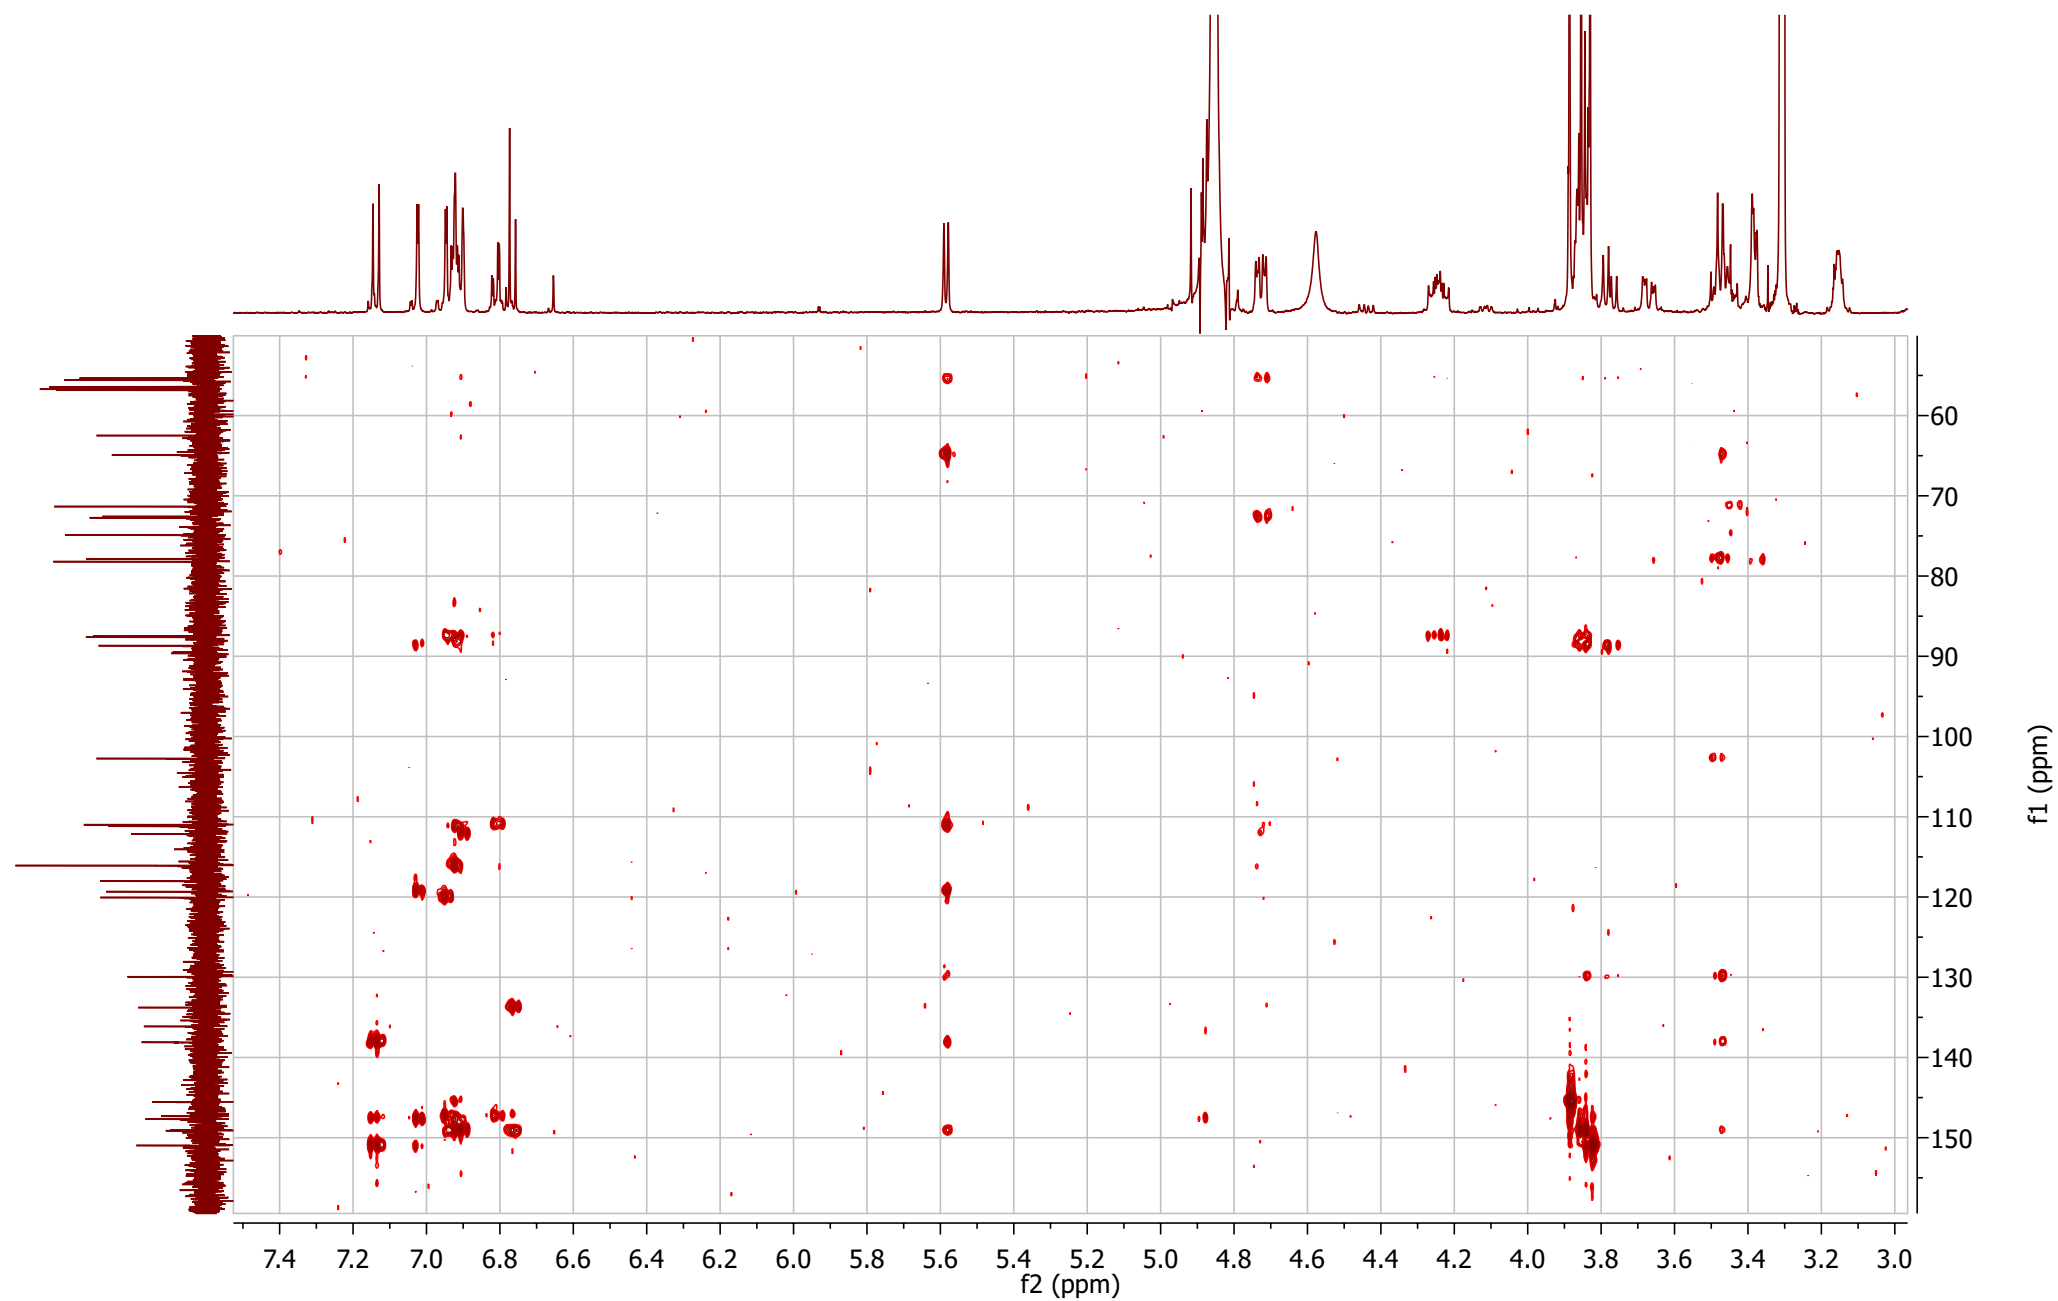

**Figure S14. HMBC spectrum of compound 1**

**S15**

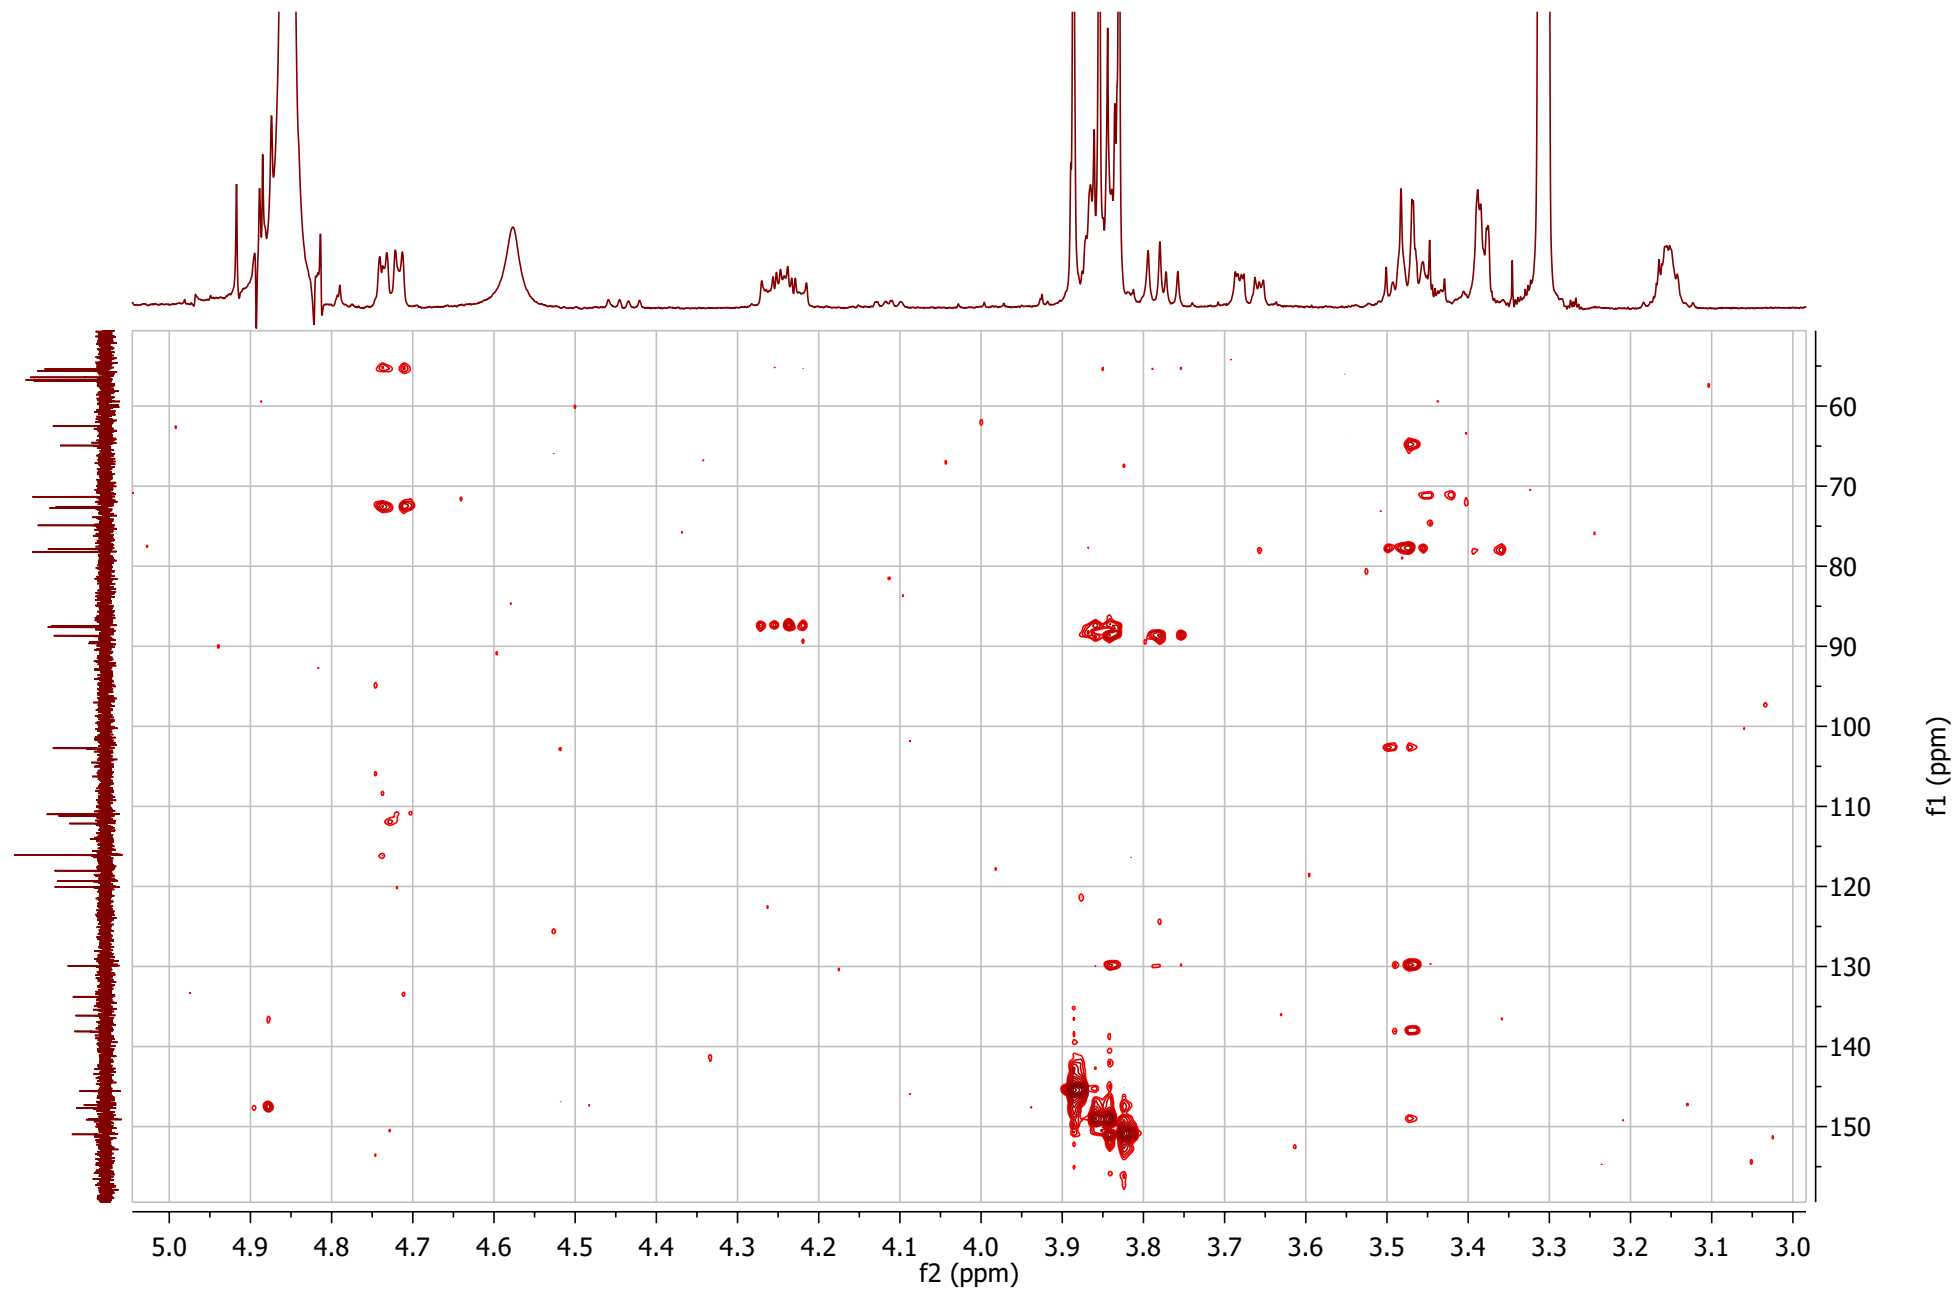

**Figure S15. Expanded HMBC spectrum of compound 1**

**S16**

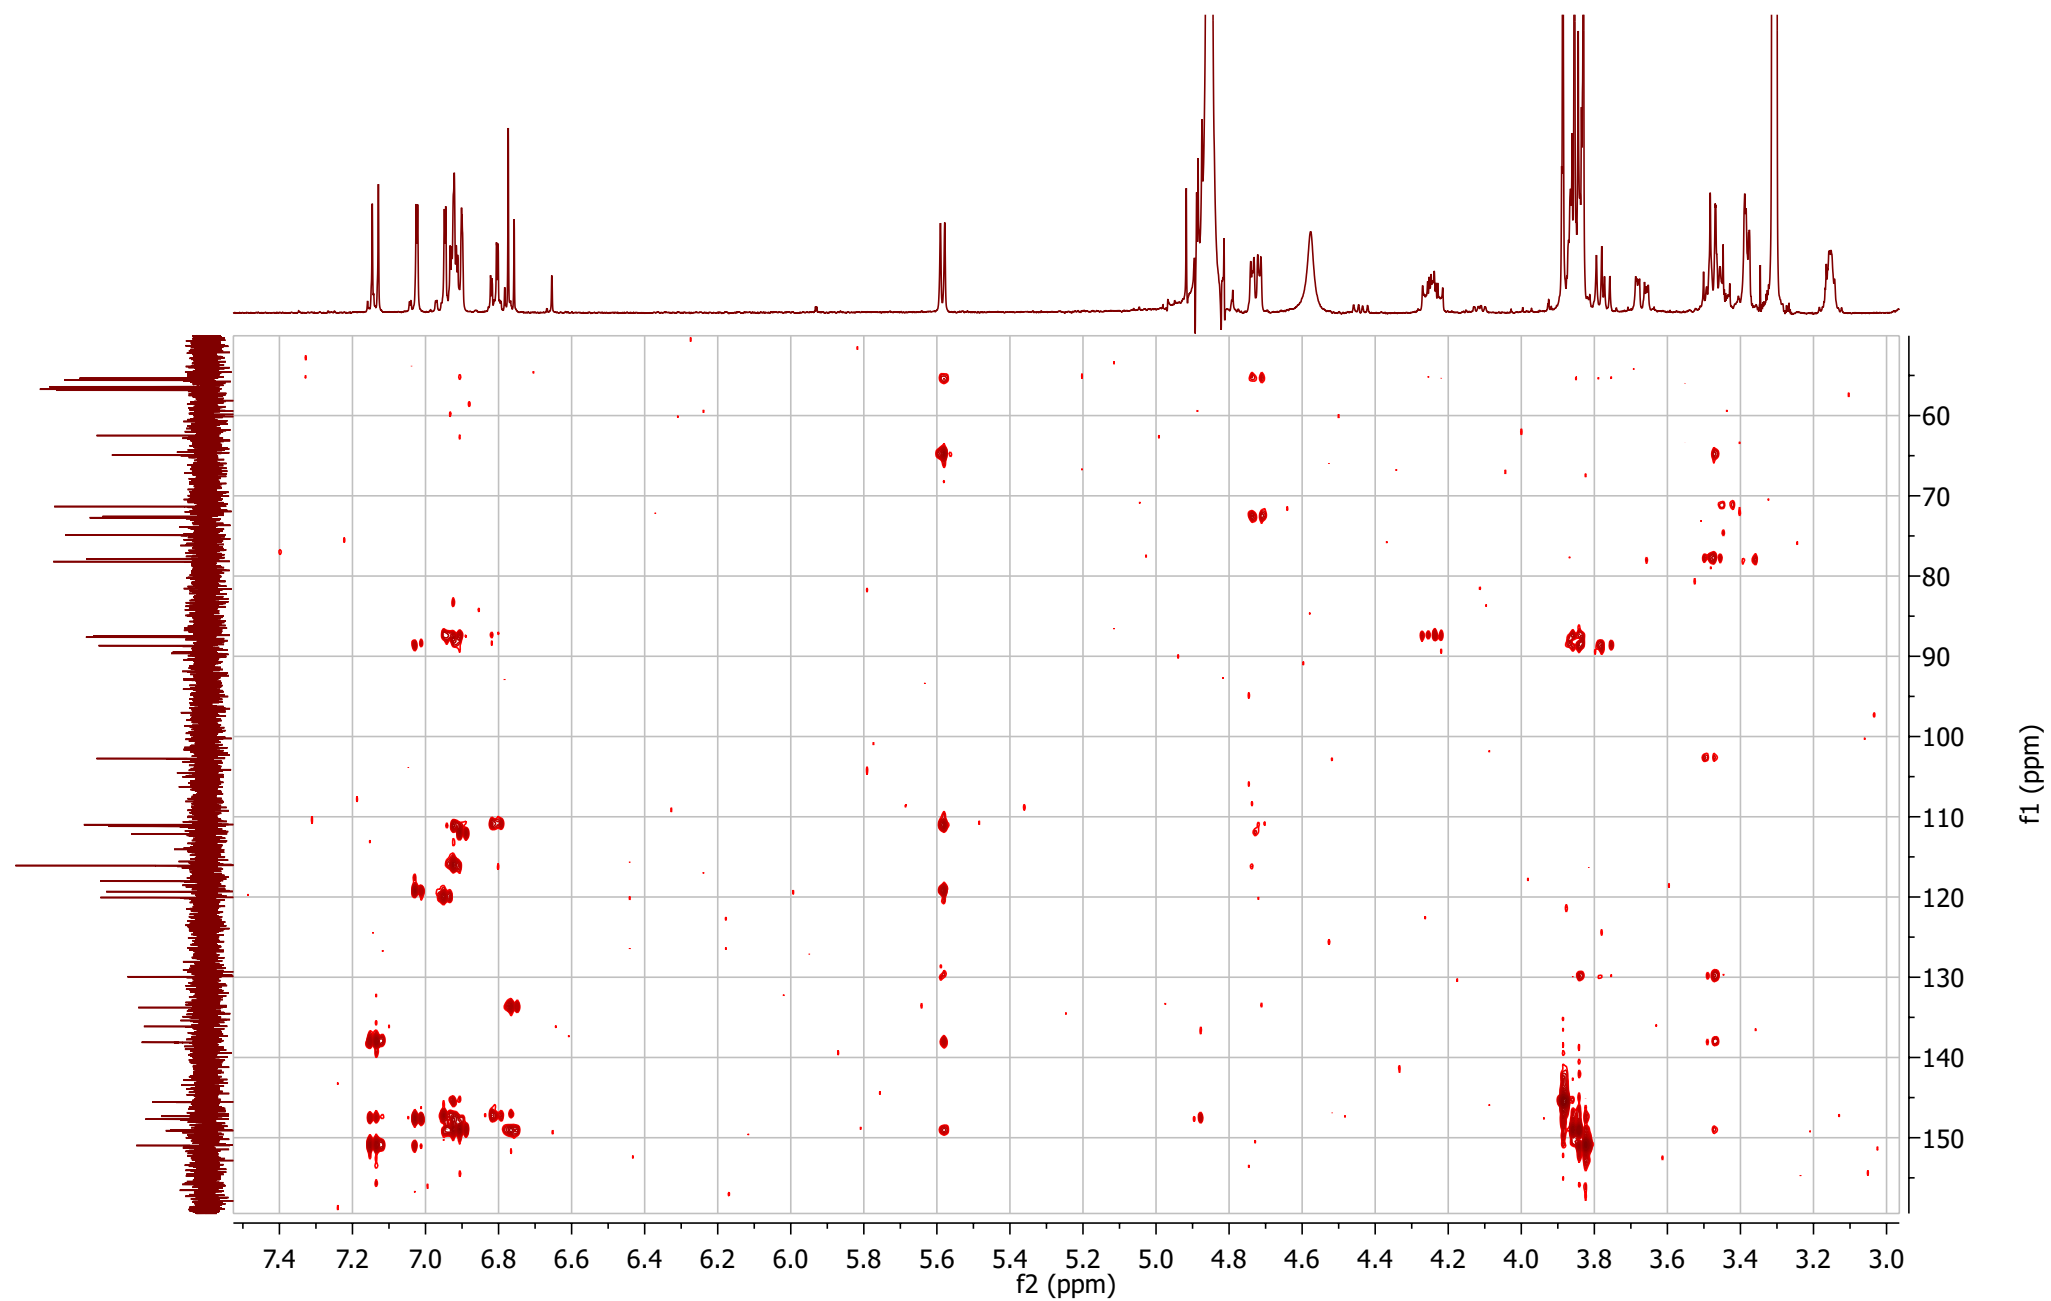

**Figure S16. Expanded HMBC spectrum of compound 1**

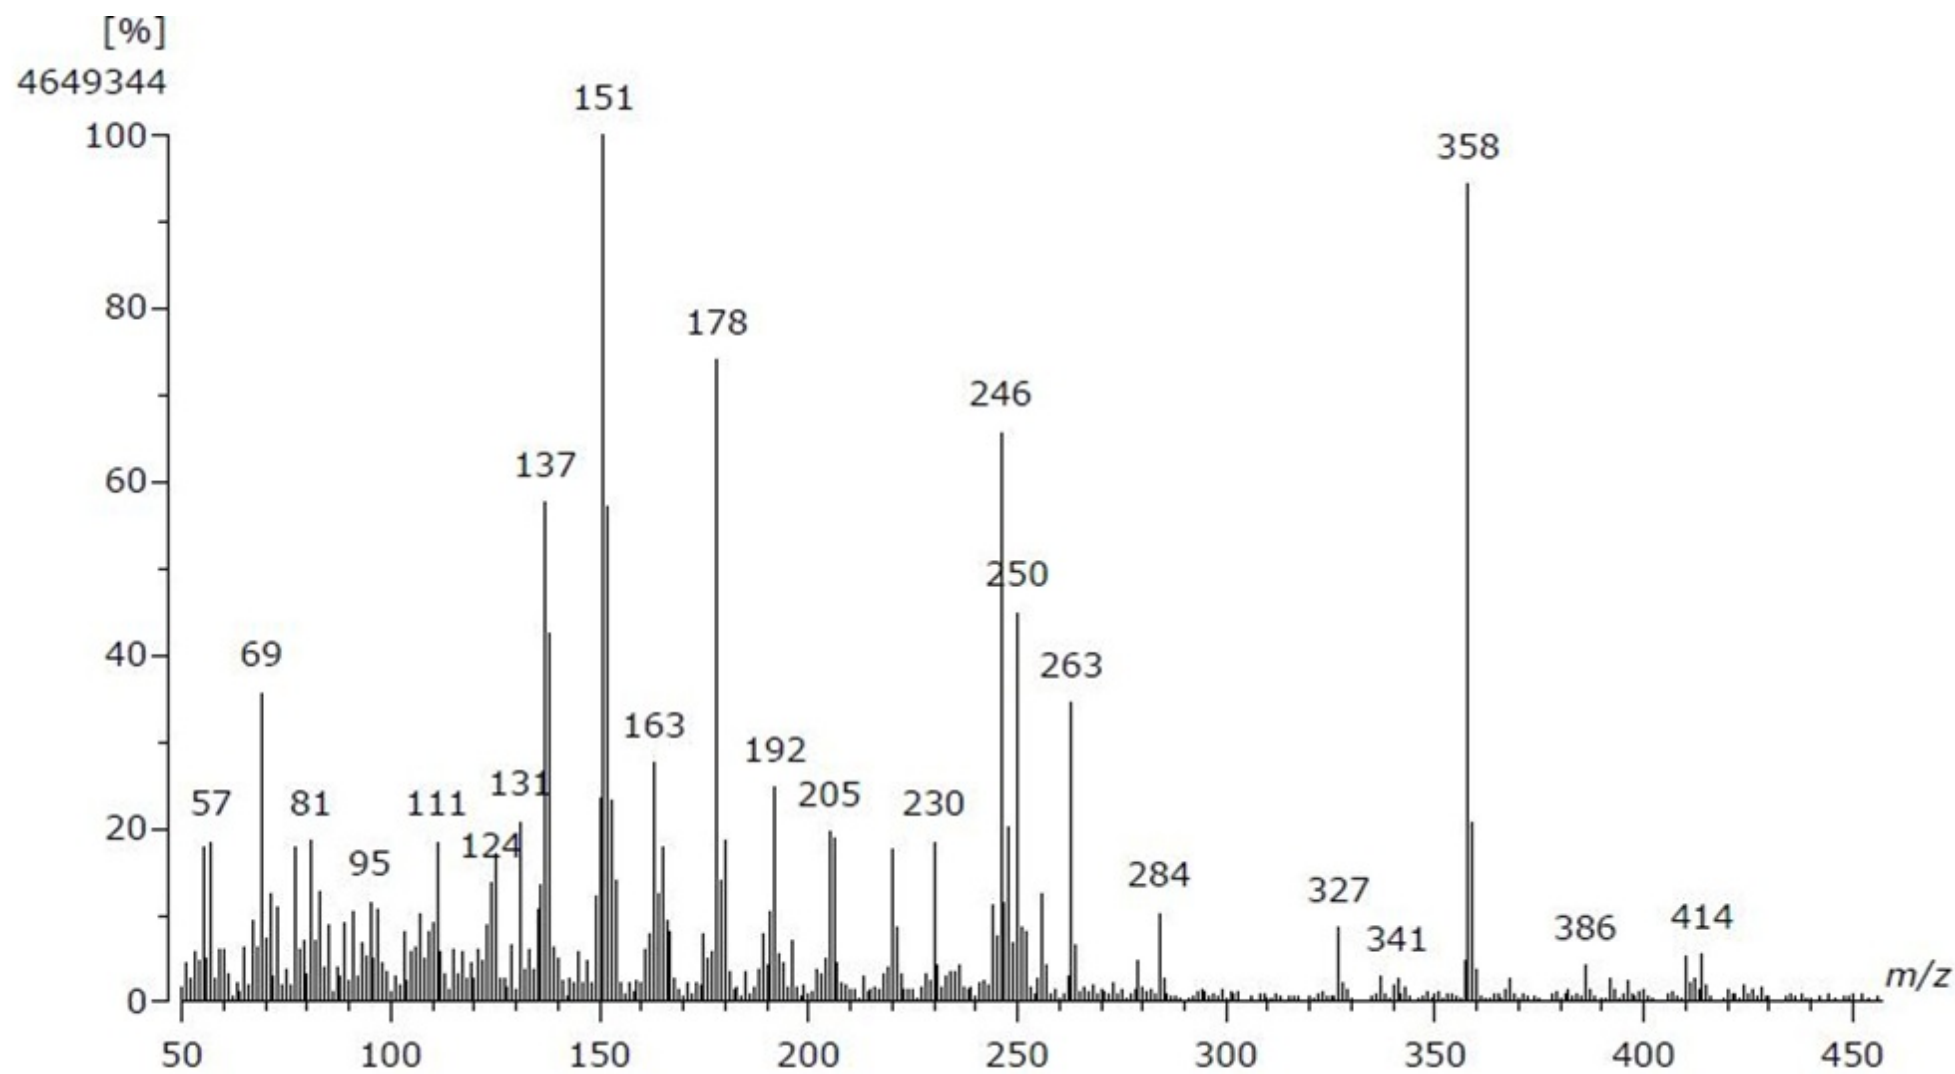

Figure S17. EI-MS spectrum of compound 2

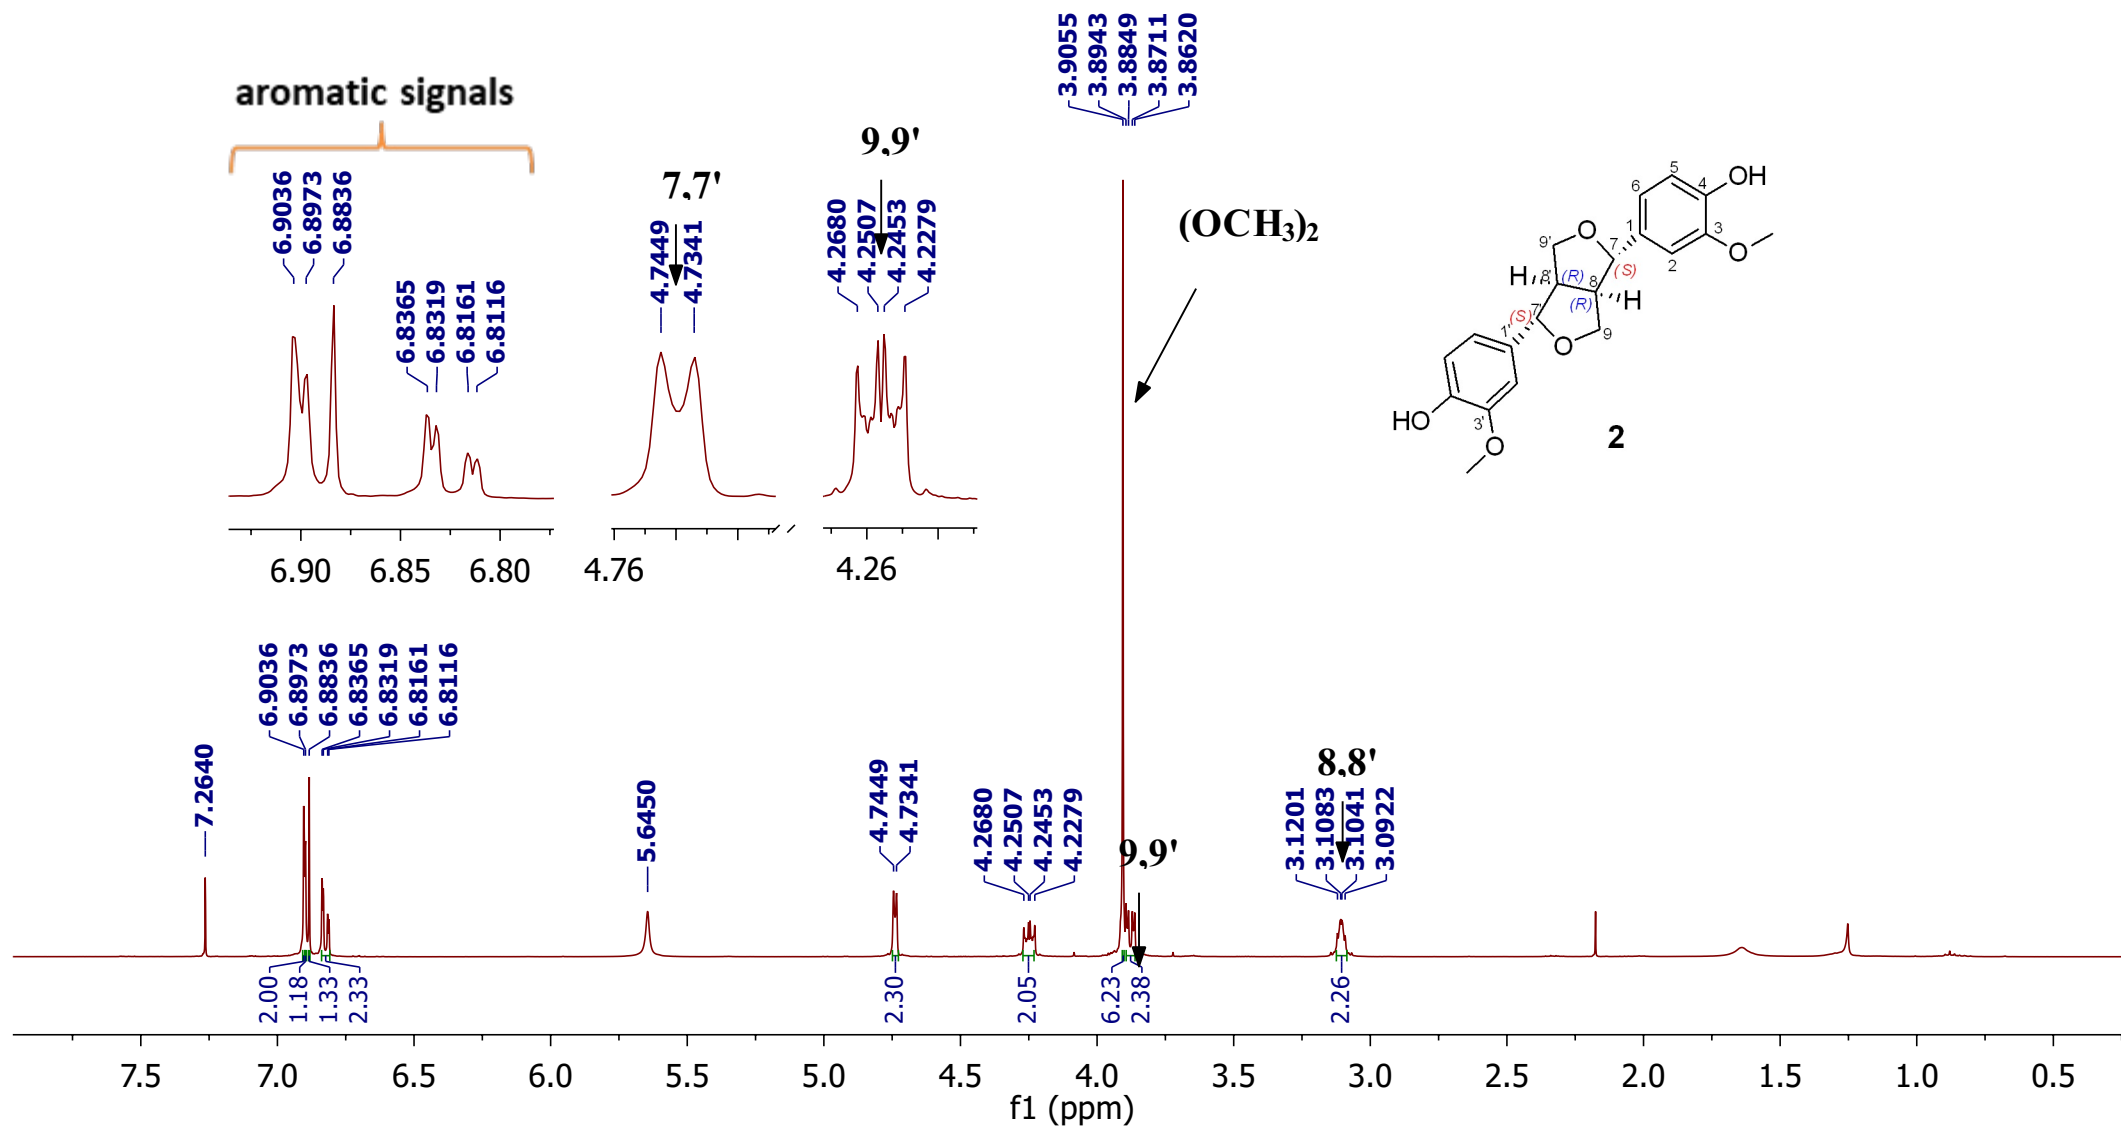

Figure S18. <sup>1</sup>H NMR spectrum of compound 2 (CD<sub>3</sub>OD, 400 MHz)

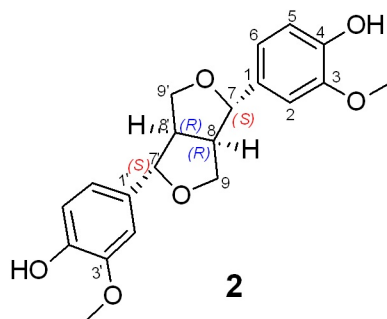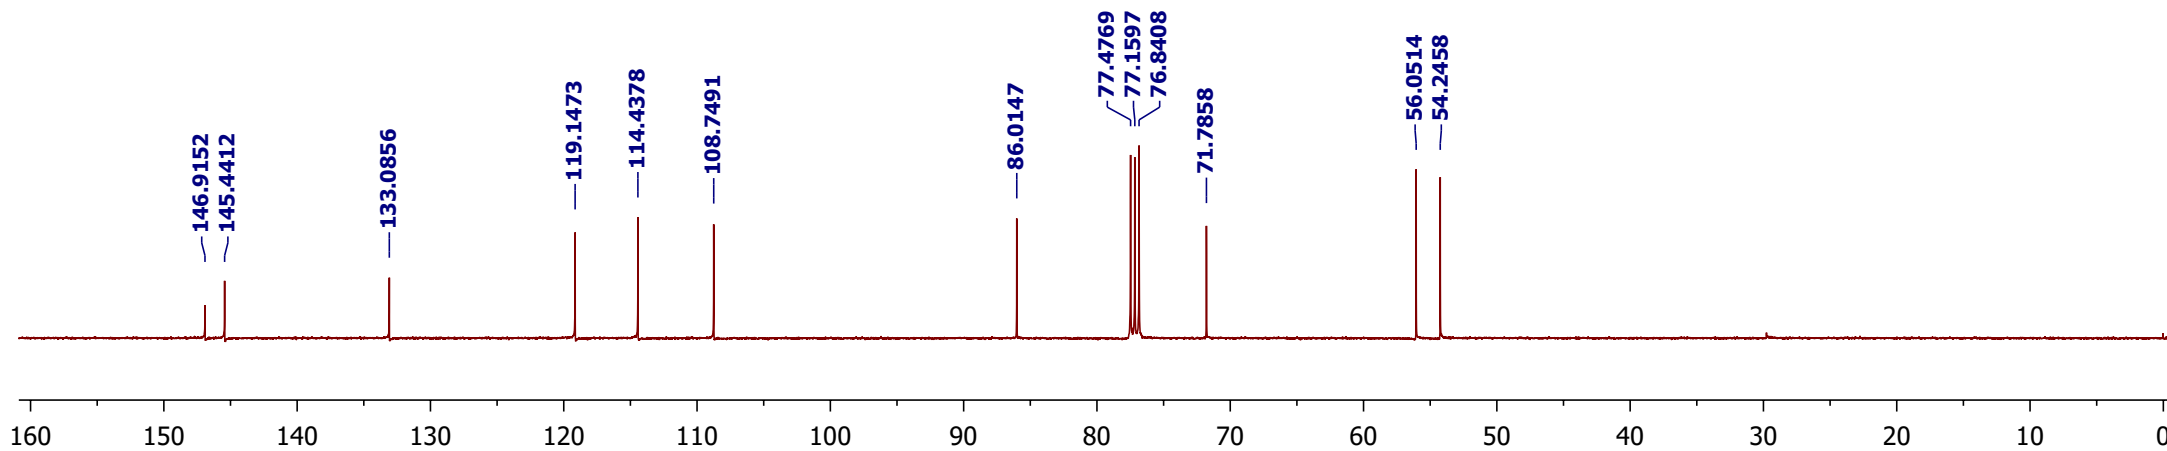

Figure S19. <sup>13</sup>CNMR spectrum of compound 2 (CD<sub>3</sub>OD, 100 MHz)

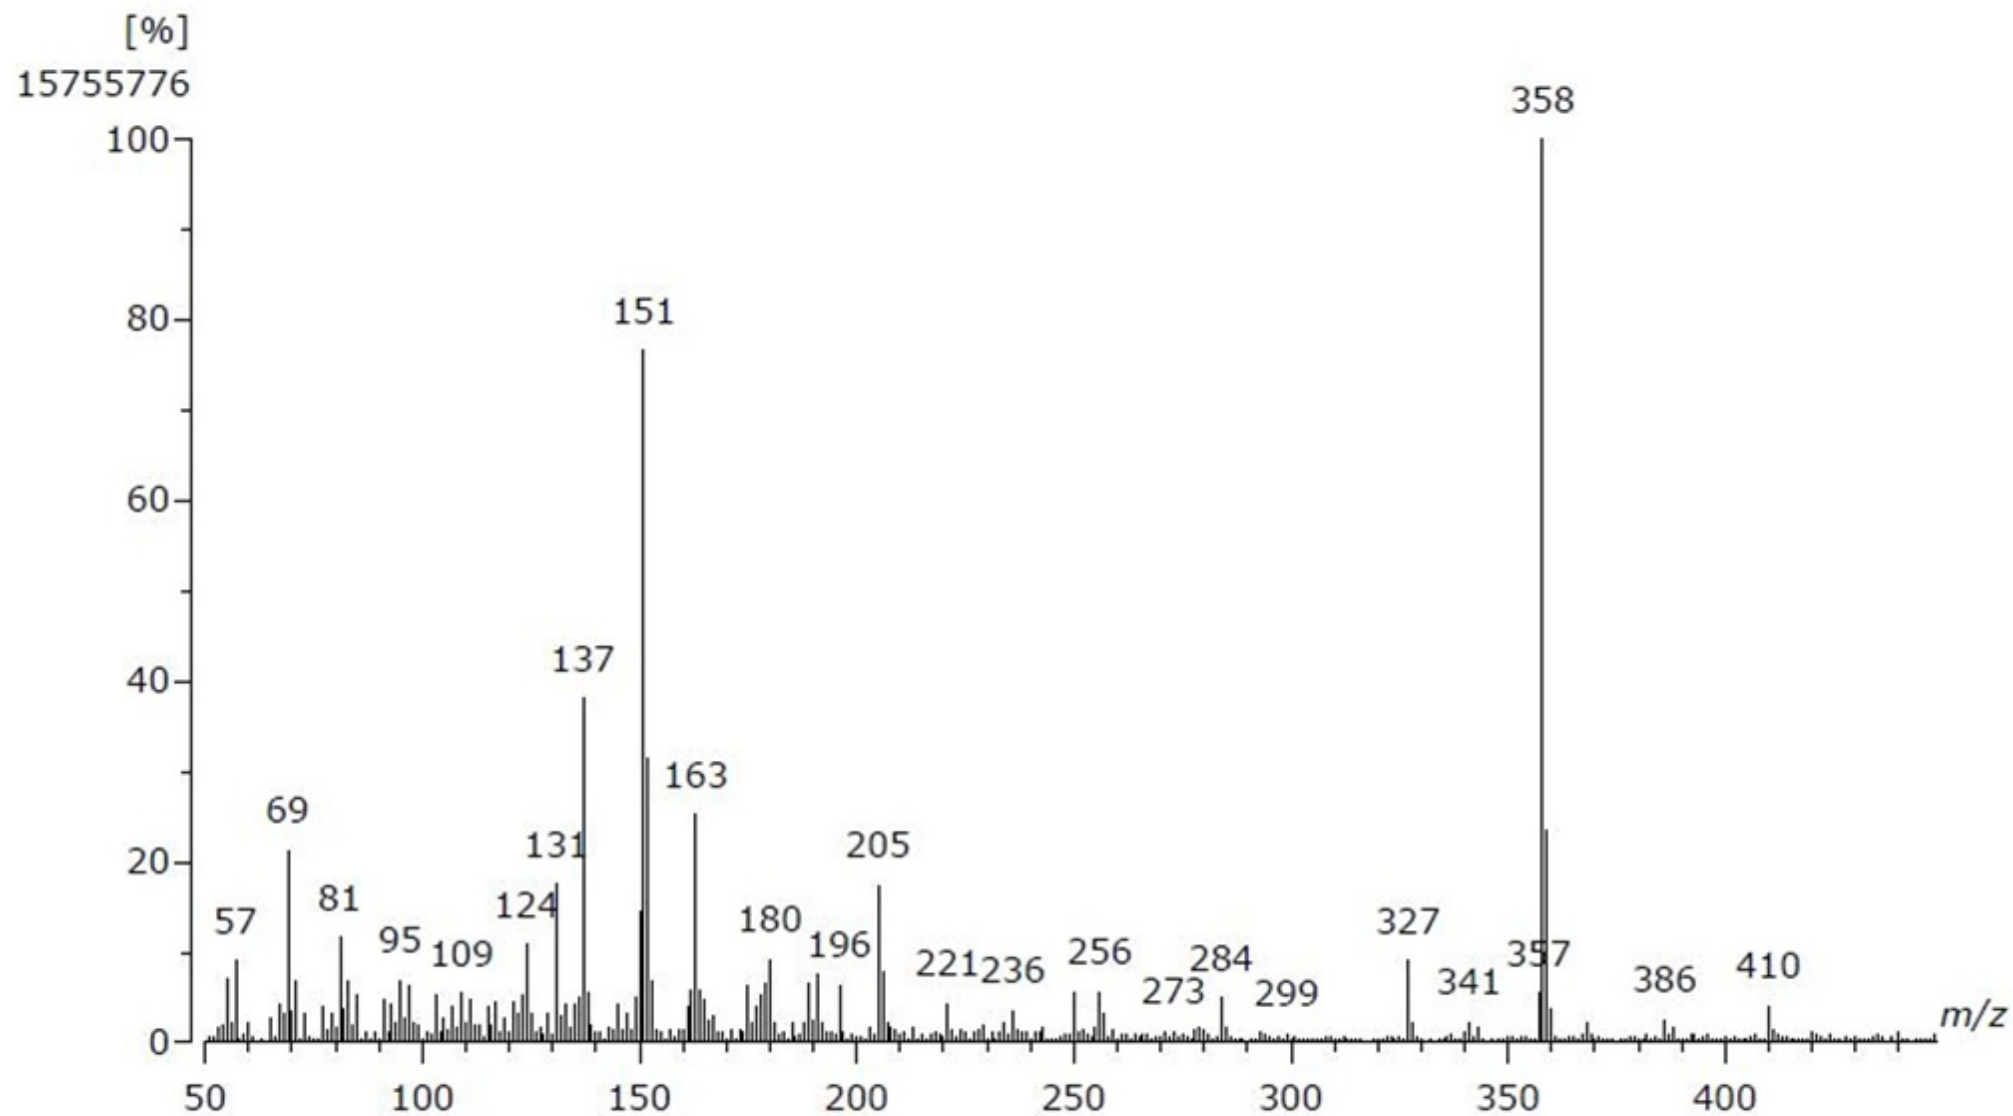

Figure S20. EI-MS spectrum of compound 3



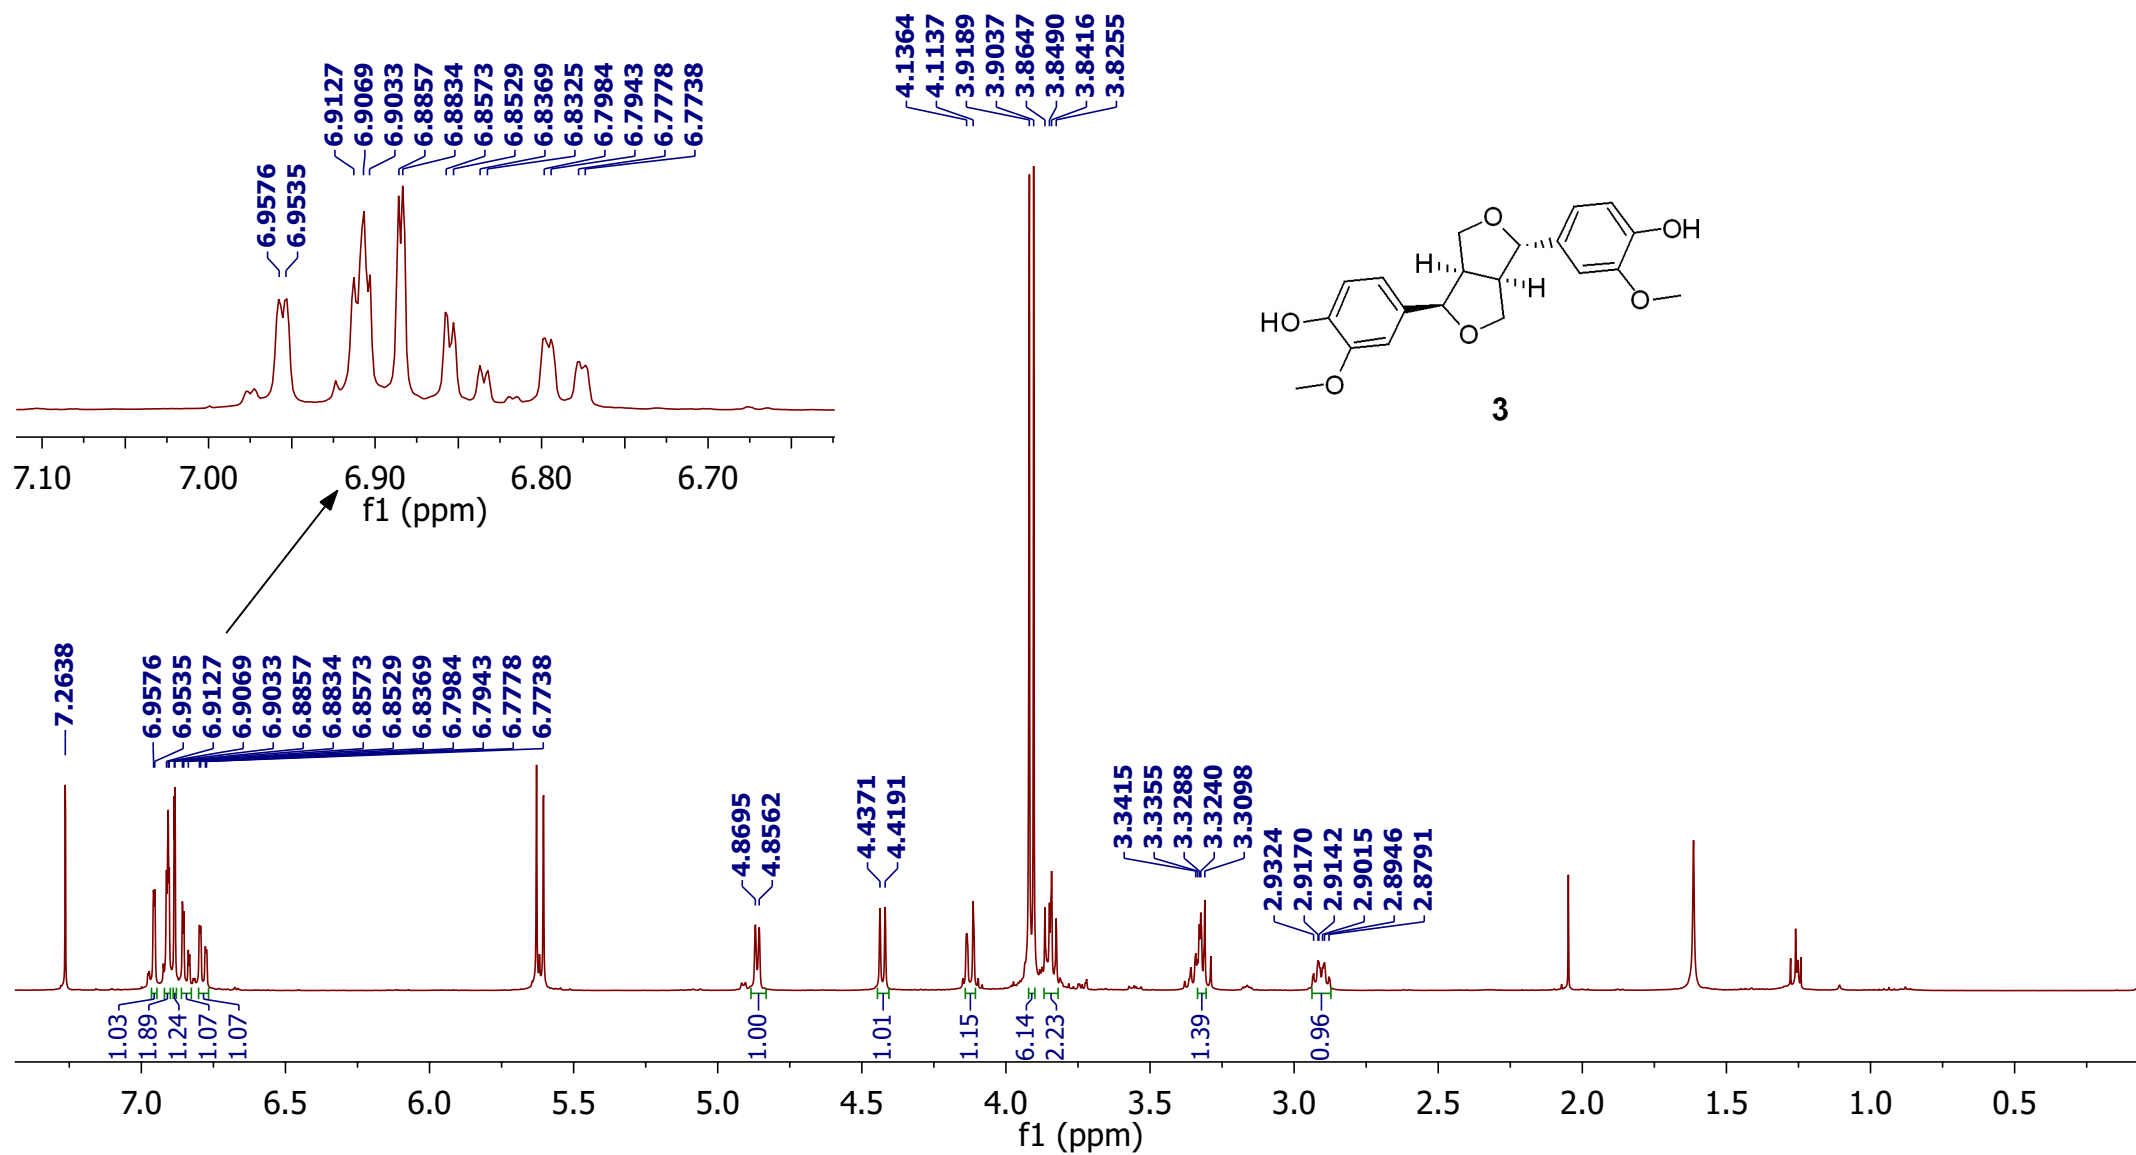

Figure S21. <sup>1</sup>H NMR spectrum of compound 3 (CDCl<sub>3</sub>, 100 MHz)

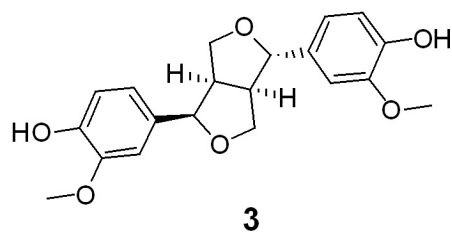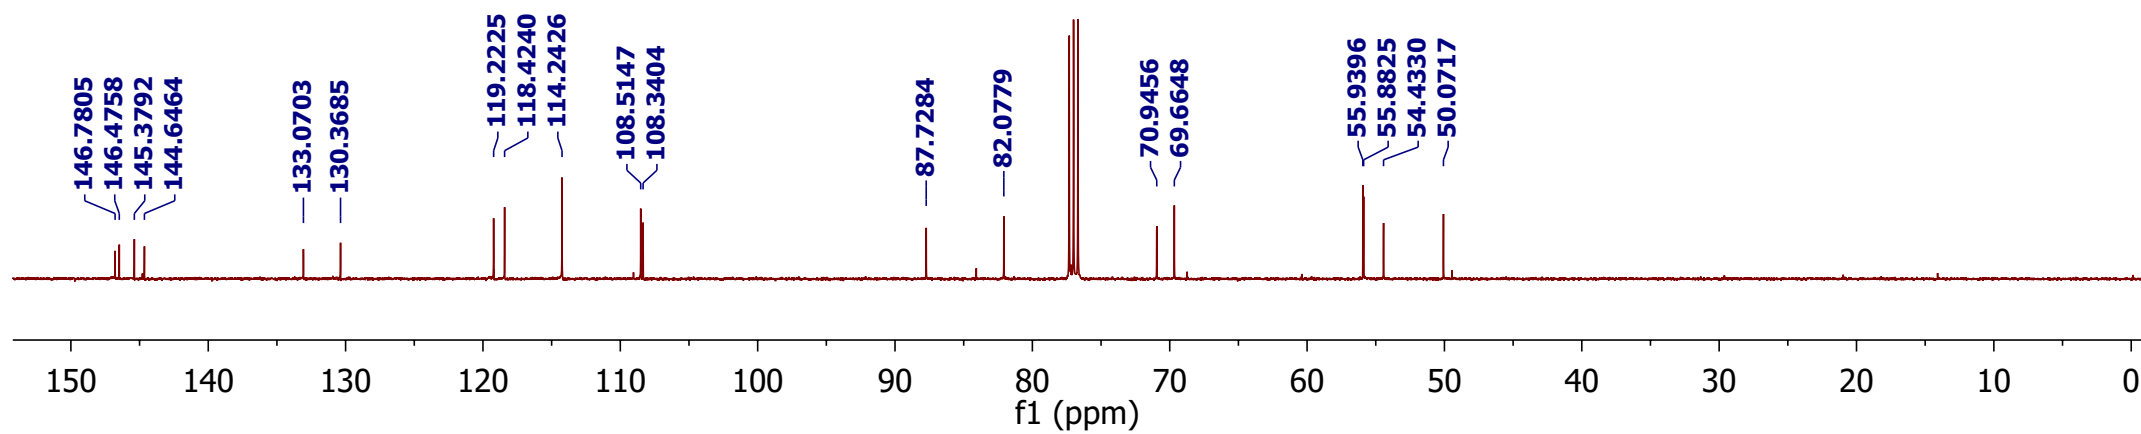

Figure S22. <sup>13</sup>C NMR spectrum of compound 3 (CDCl<sub>3</sub>, 100 MHz)

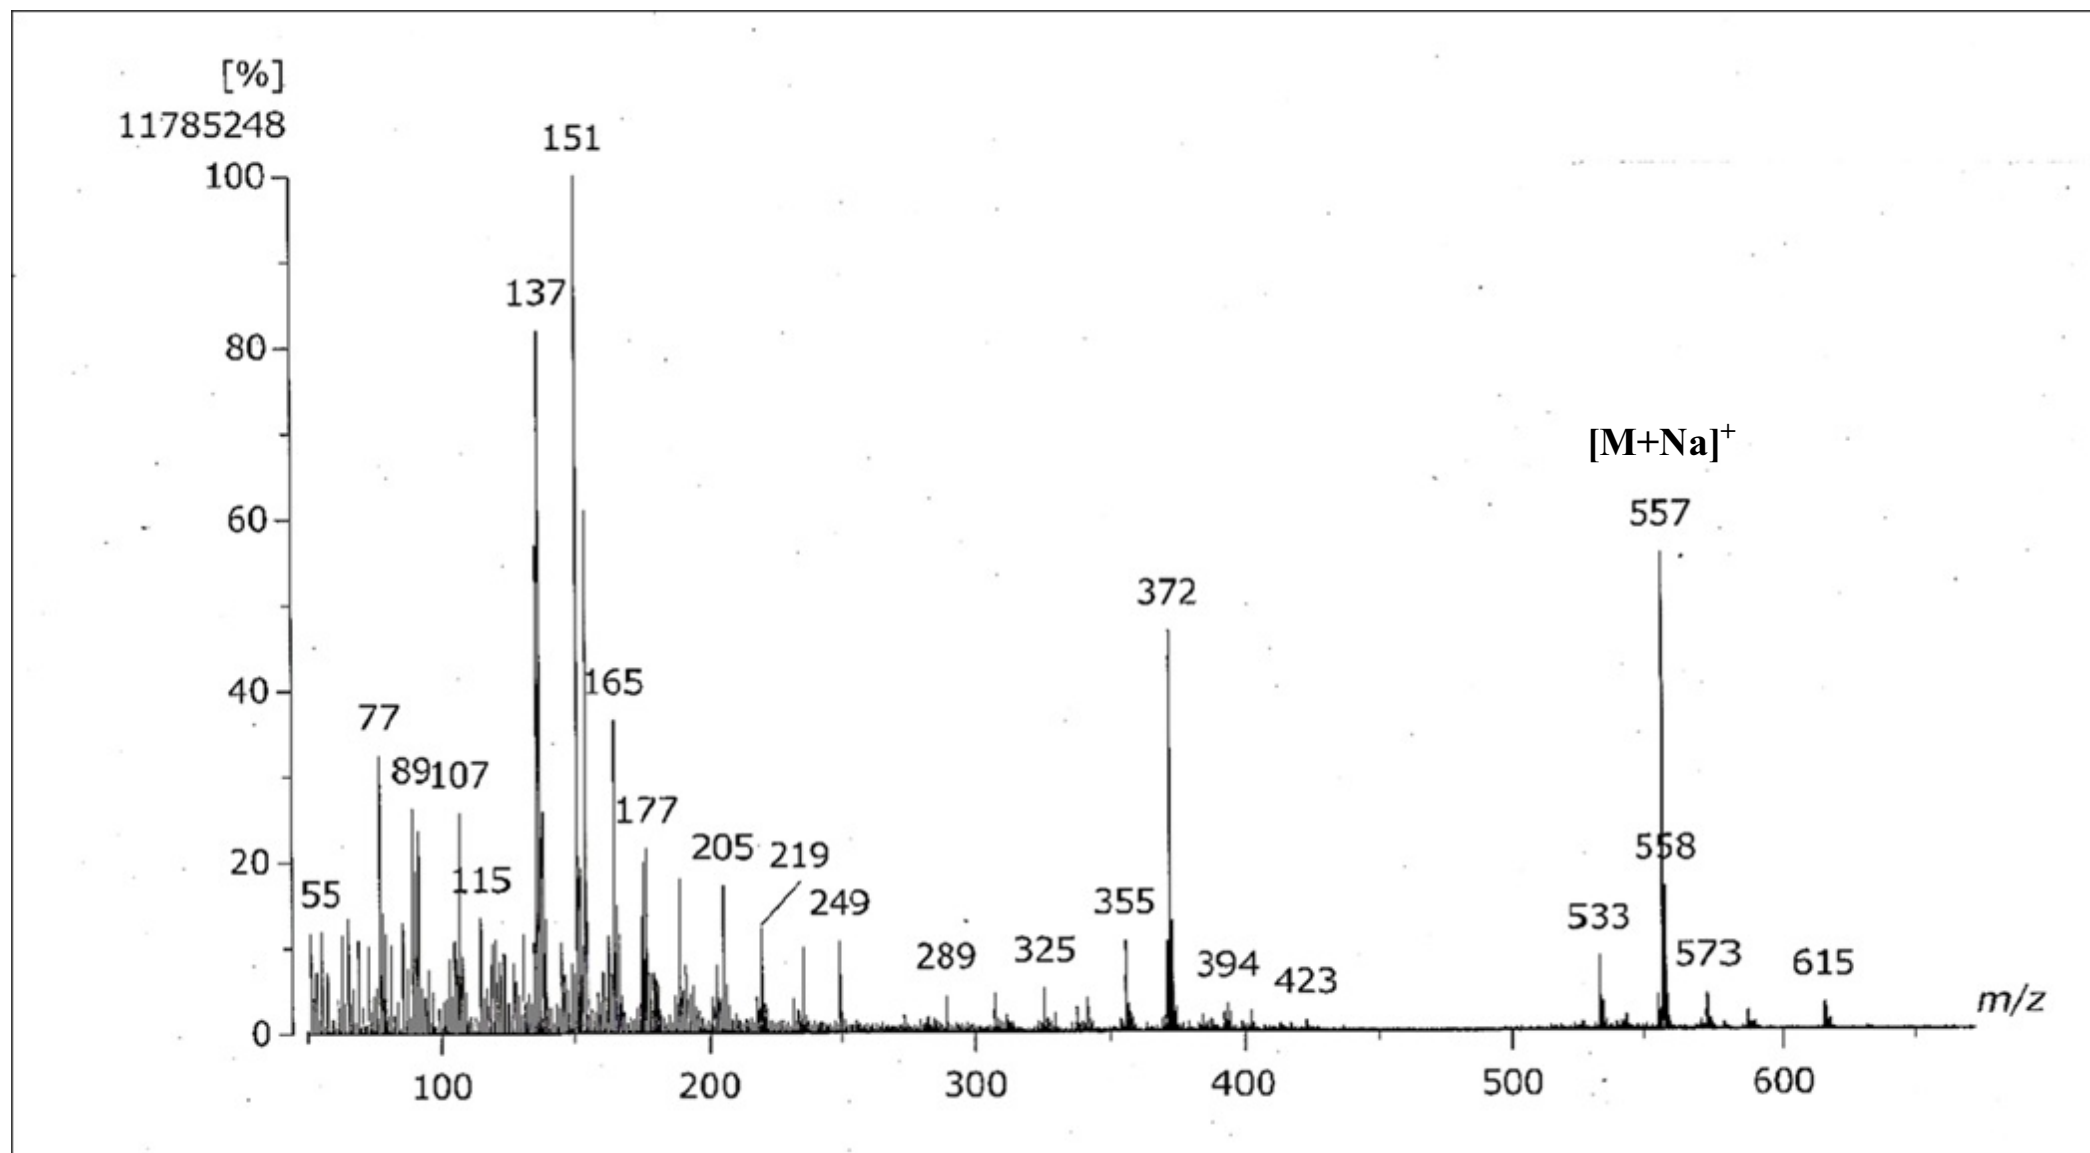

Figure S23. Positive FAB-MS spectrum of compound 4

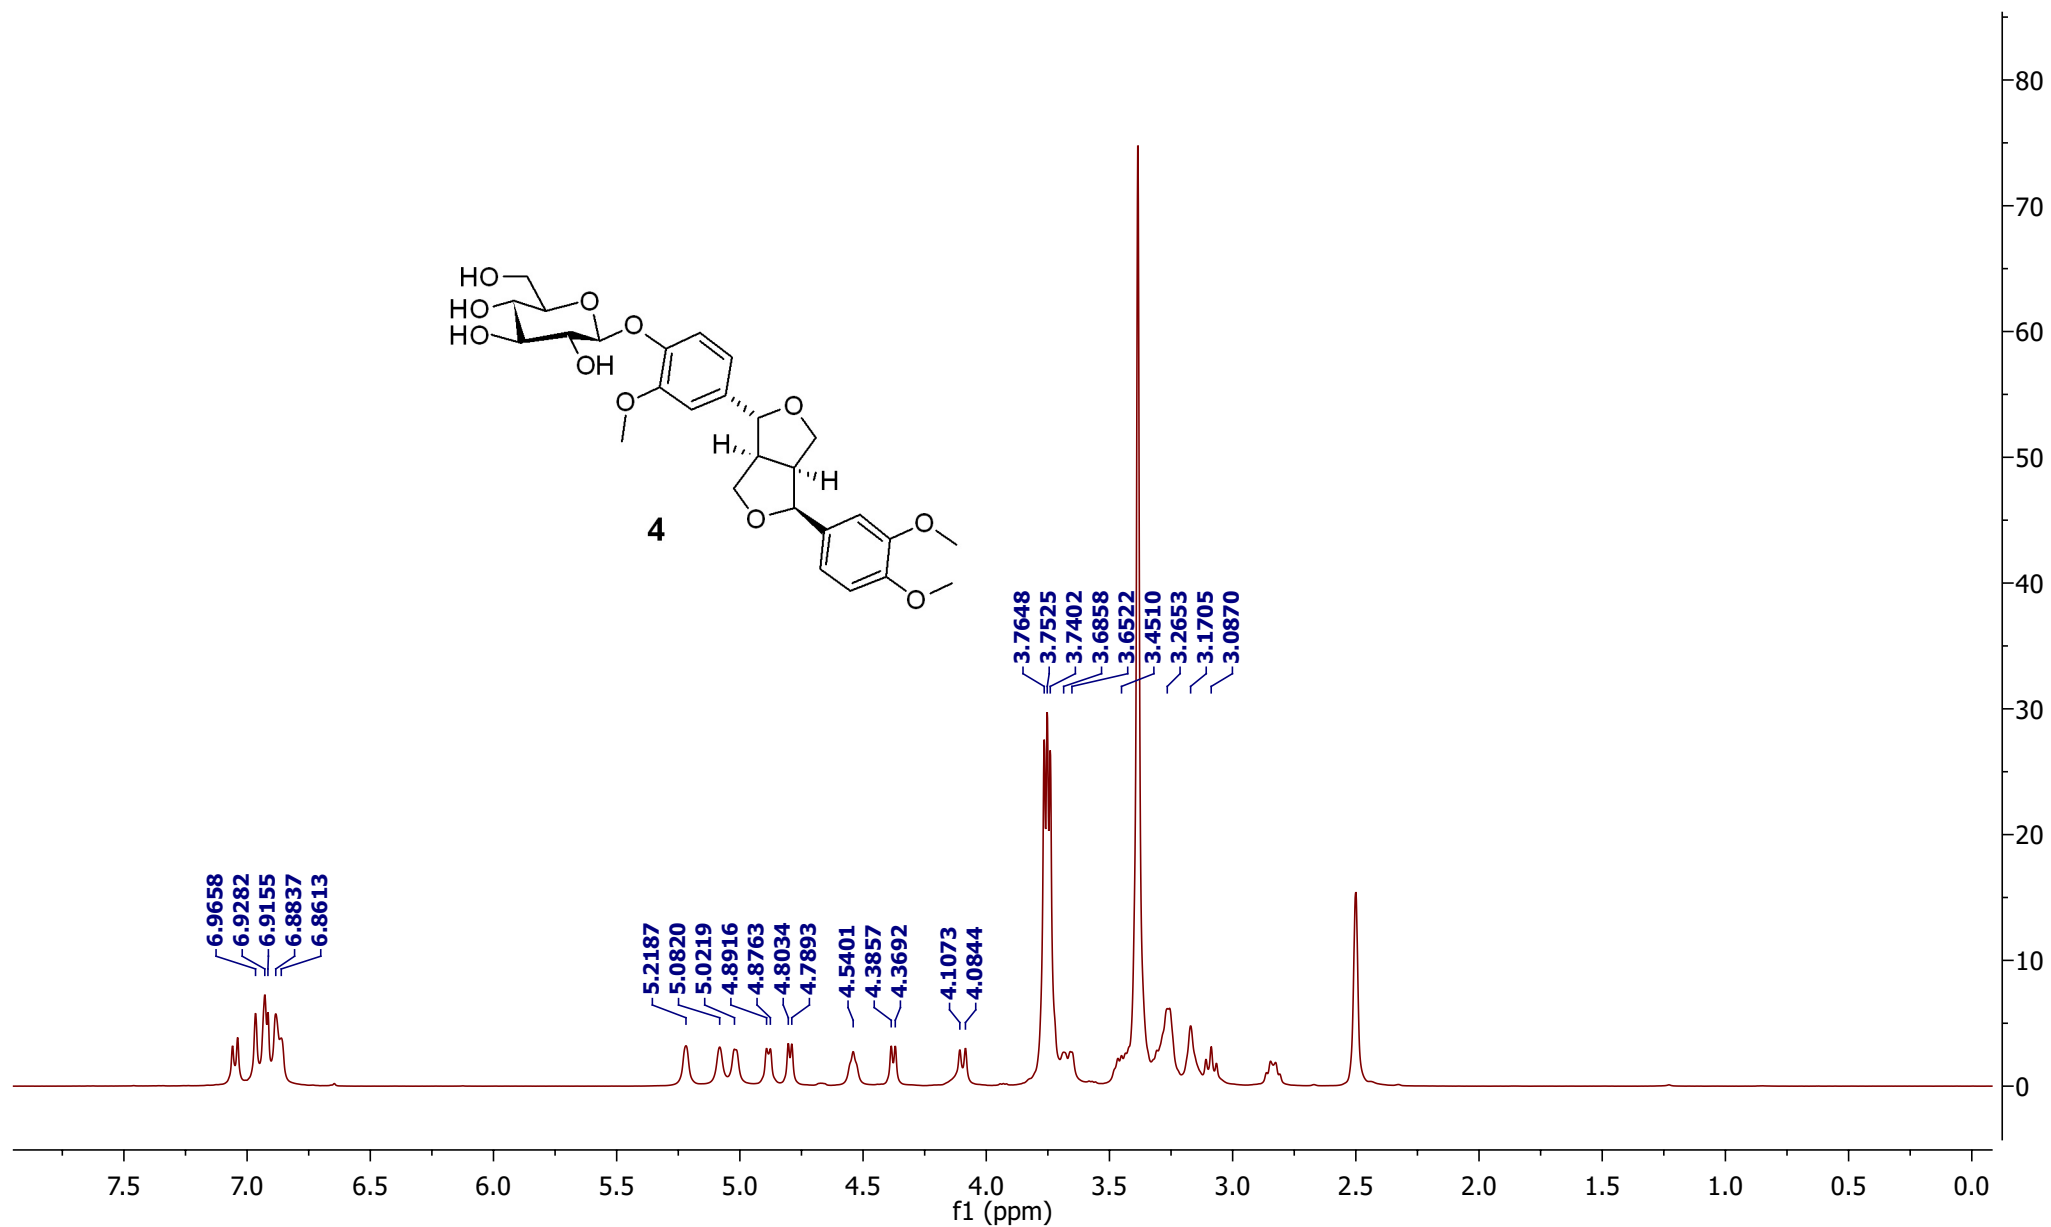

Figure S24.  $^1\text{H}$ NMR spectrum of compound 4 (DMSO- $d_6$ , 400 MHz)

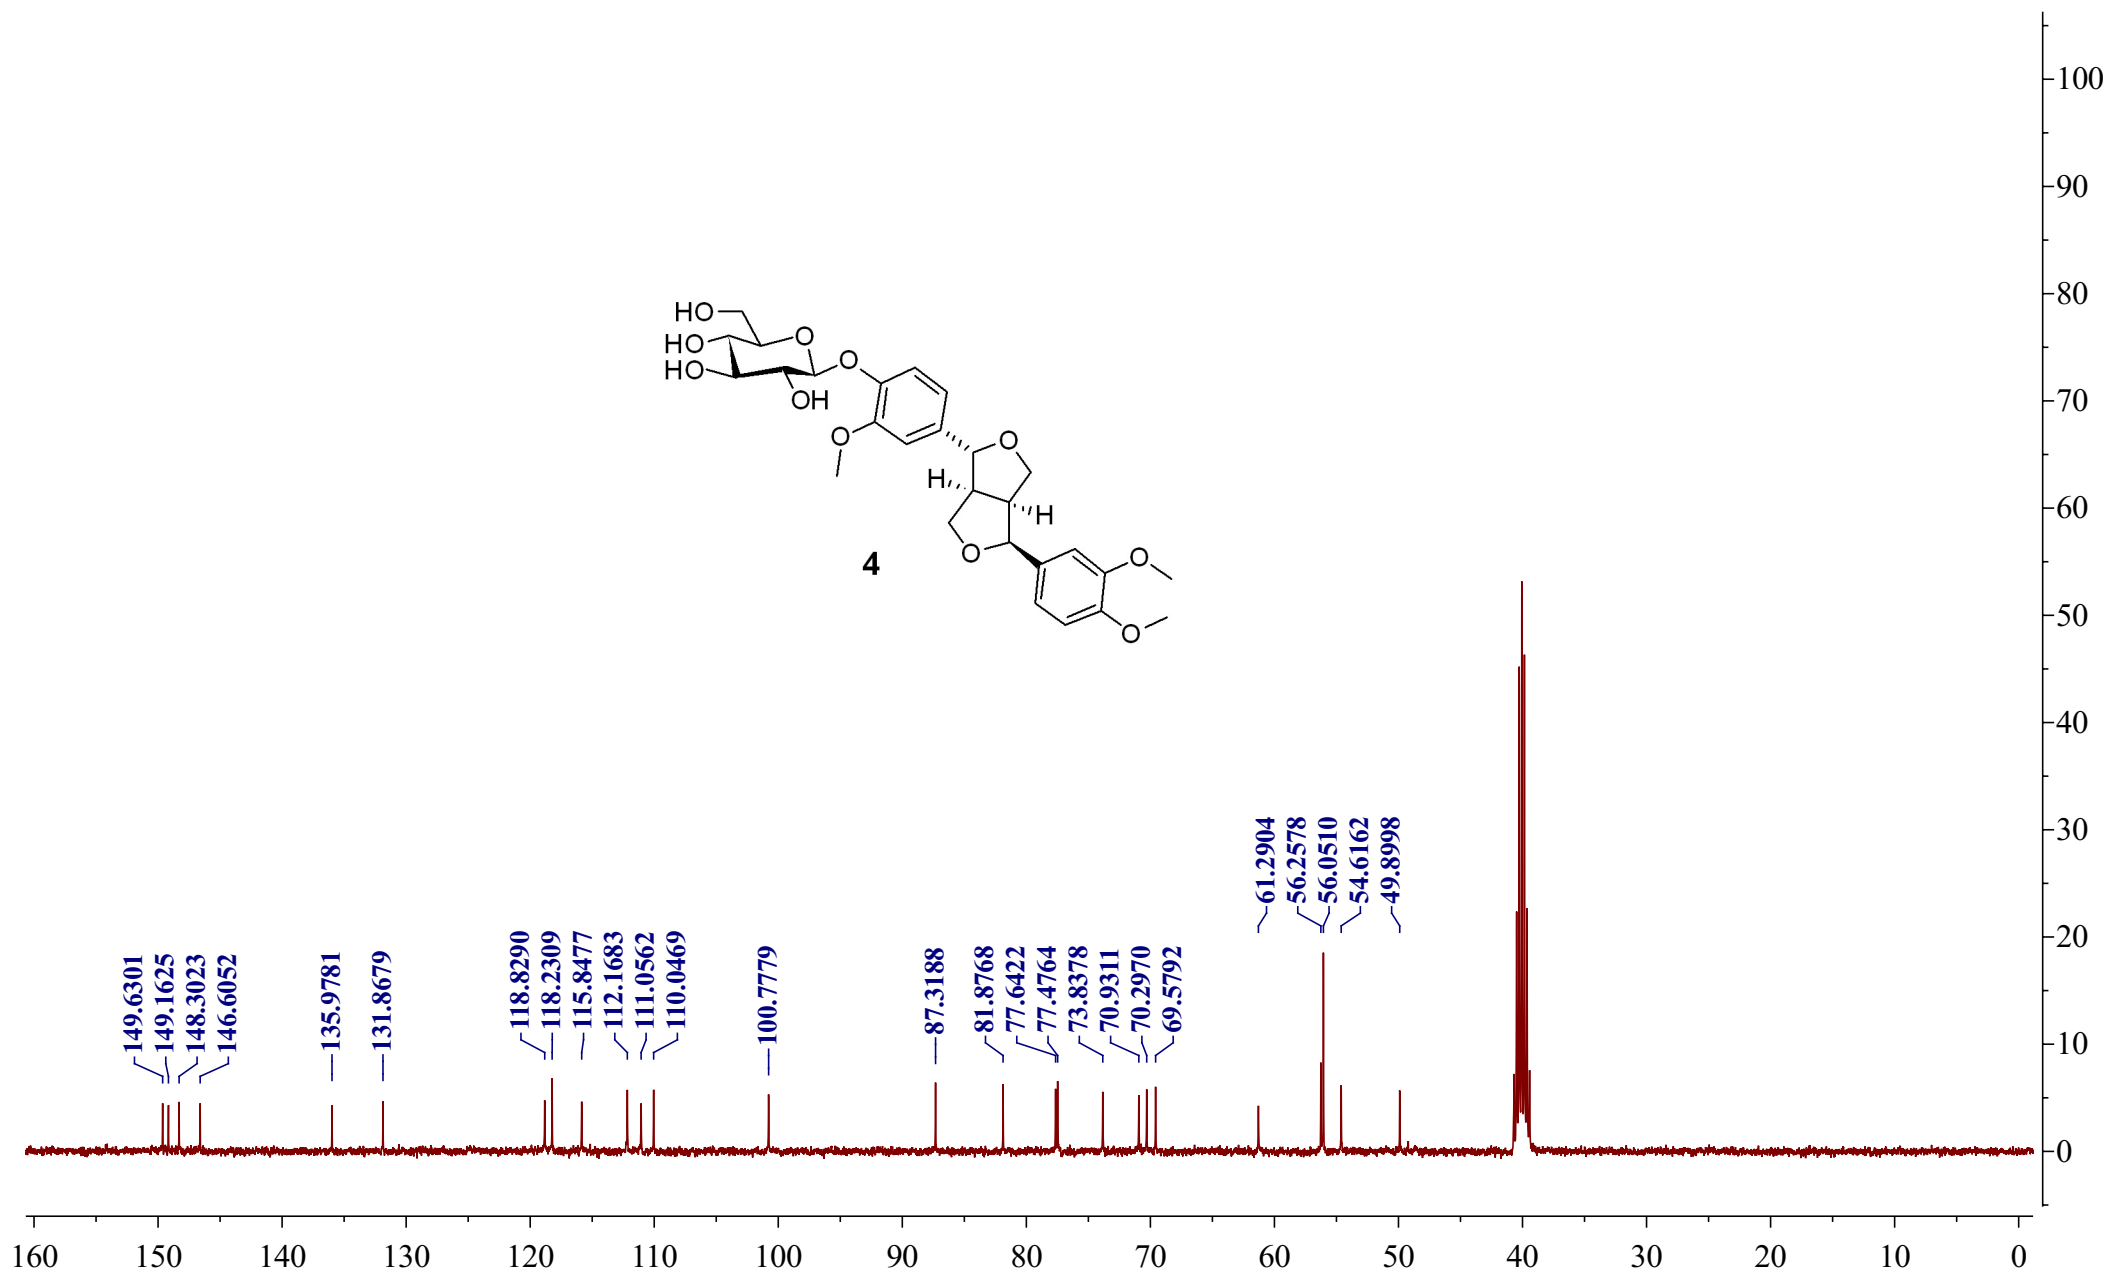

Figure S25.  $^{13}\text{C}$ NMR spectrum of compound 4 ( $\text{DMSO}-d_6$ , 100 MHz)

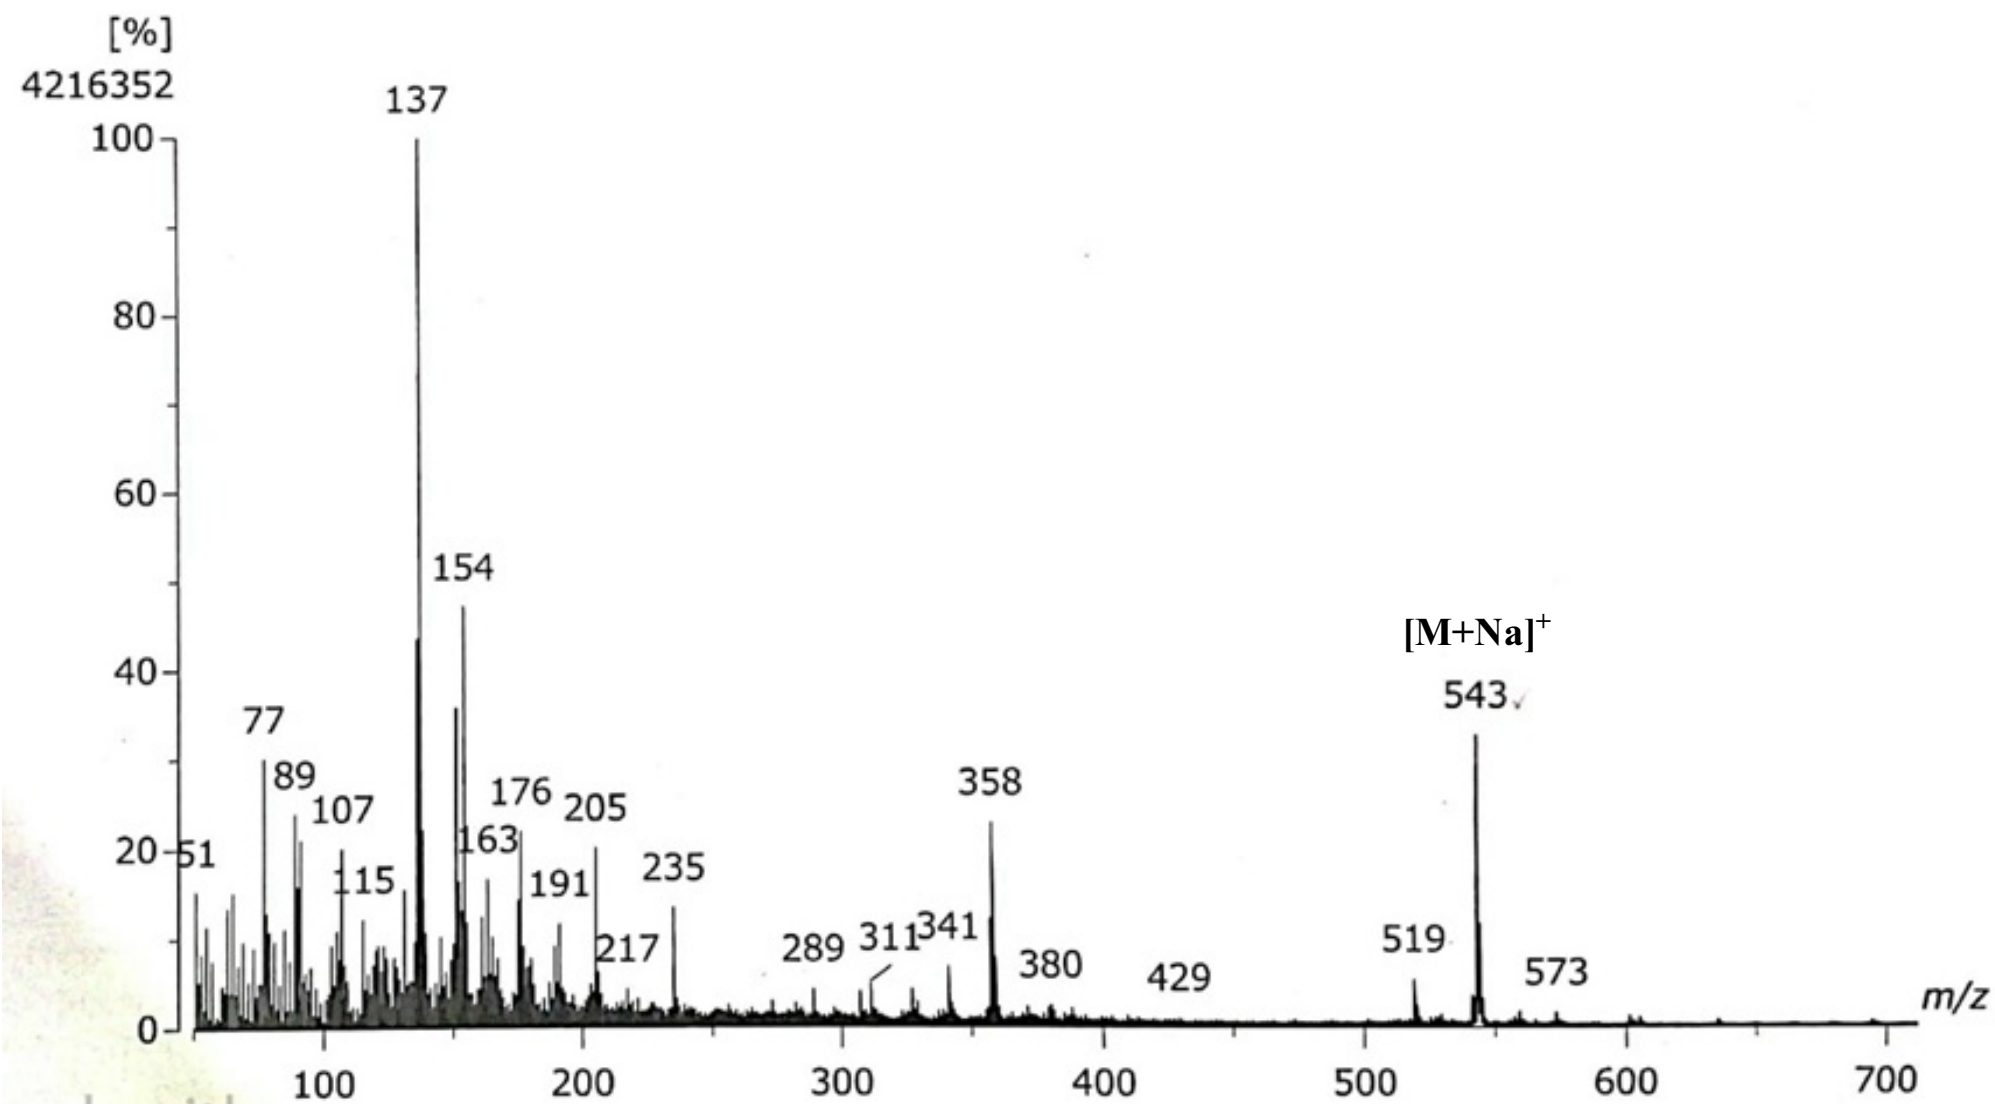

Figure S26. Positive FAB-MS spectrum of compound 5

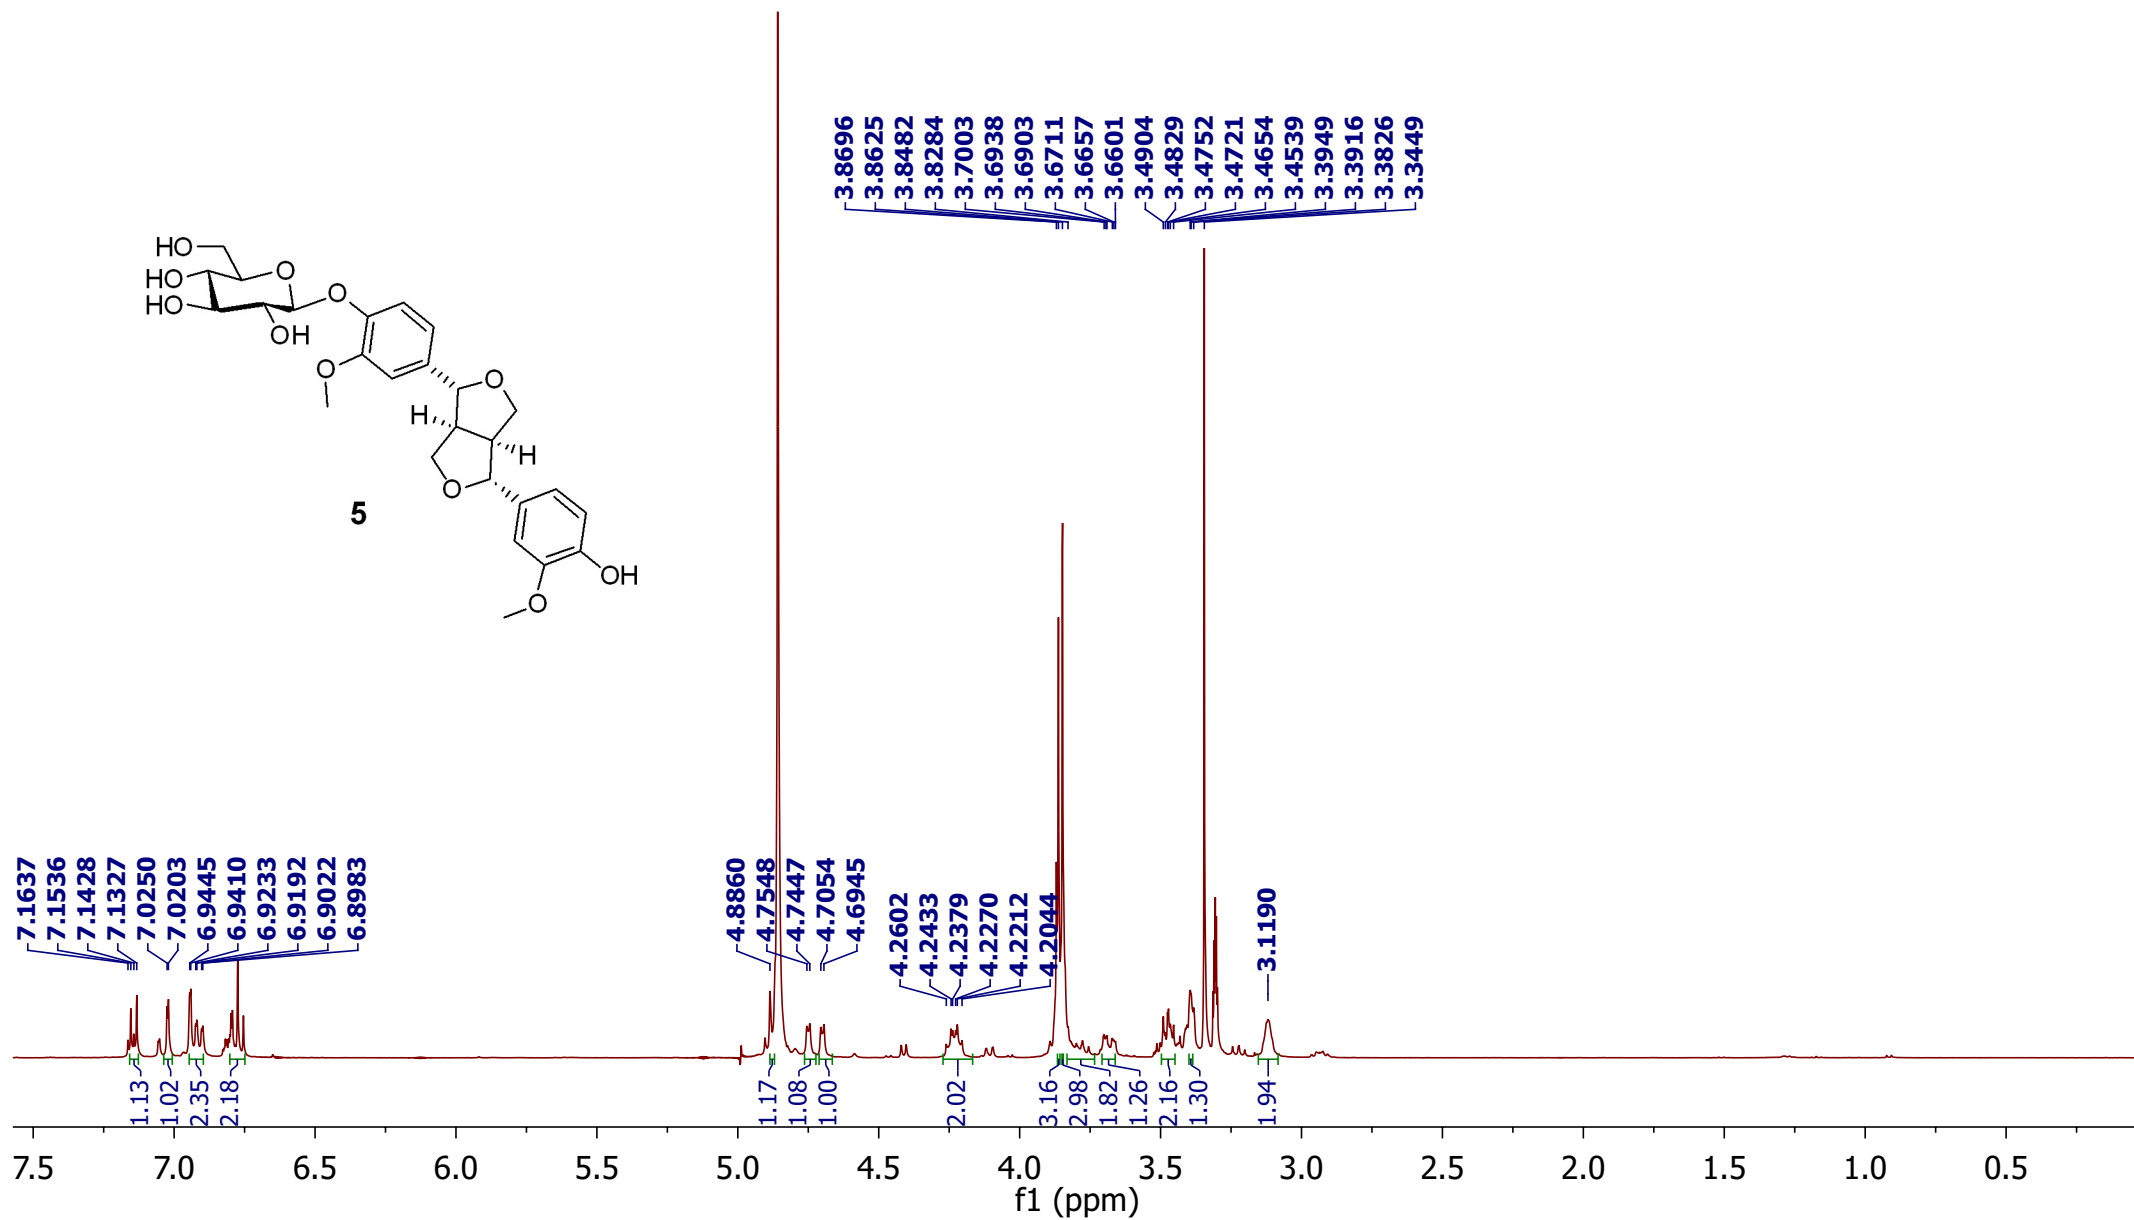

Figure S27. <sup>1</sup>H NMR spectrum of compound 5 (CD<sub>3</sub>OD, 400 MHz)

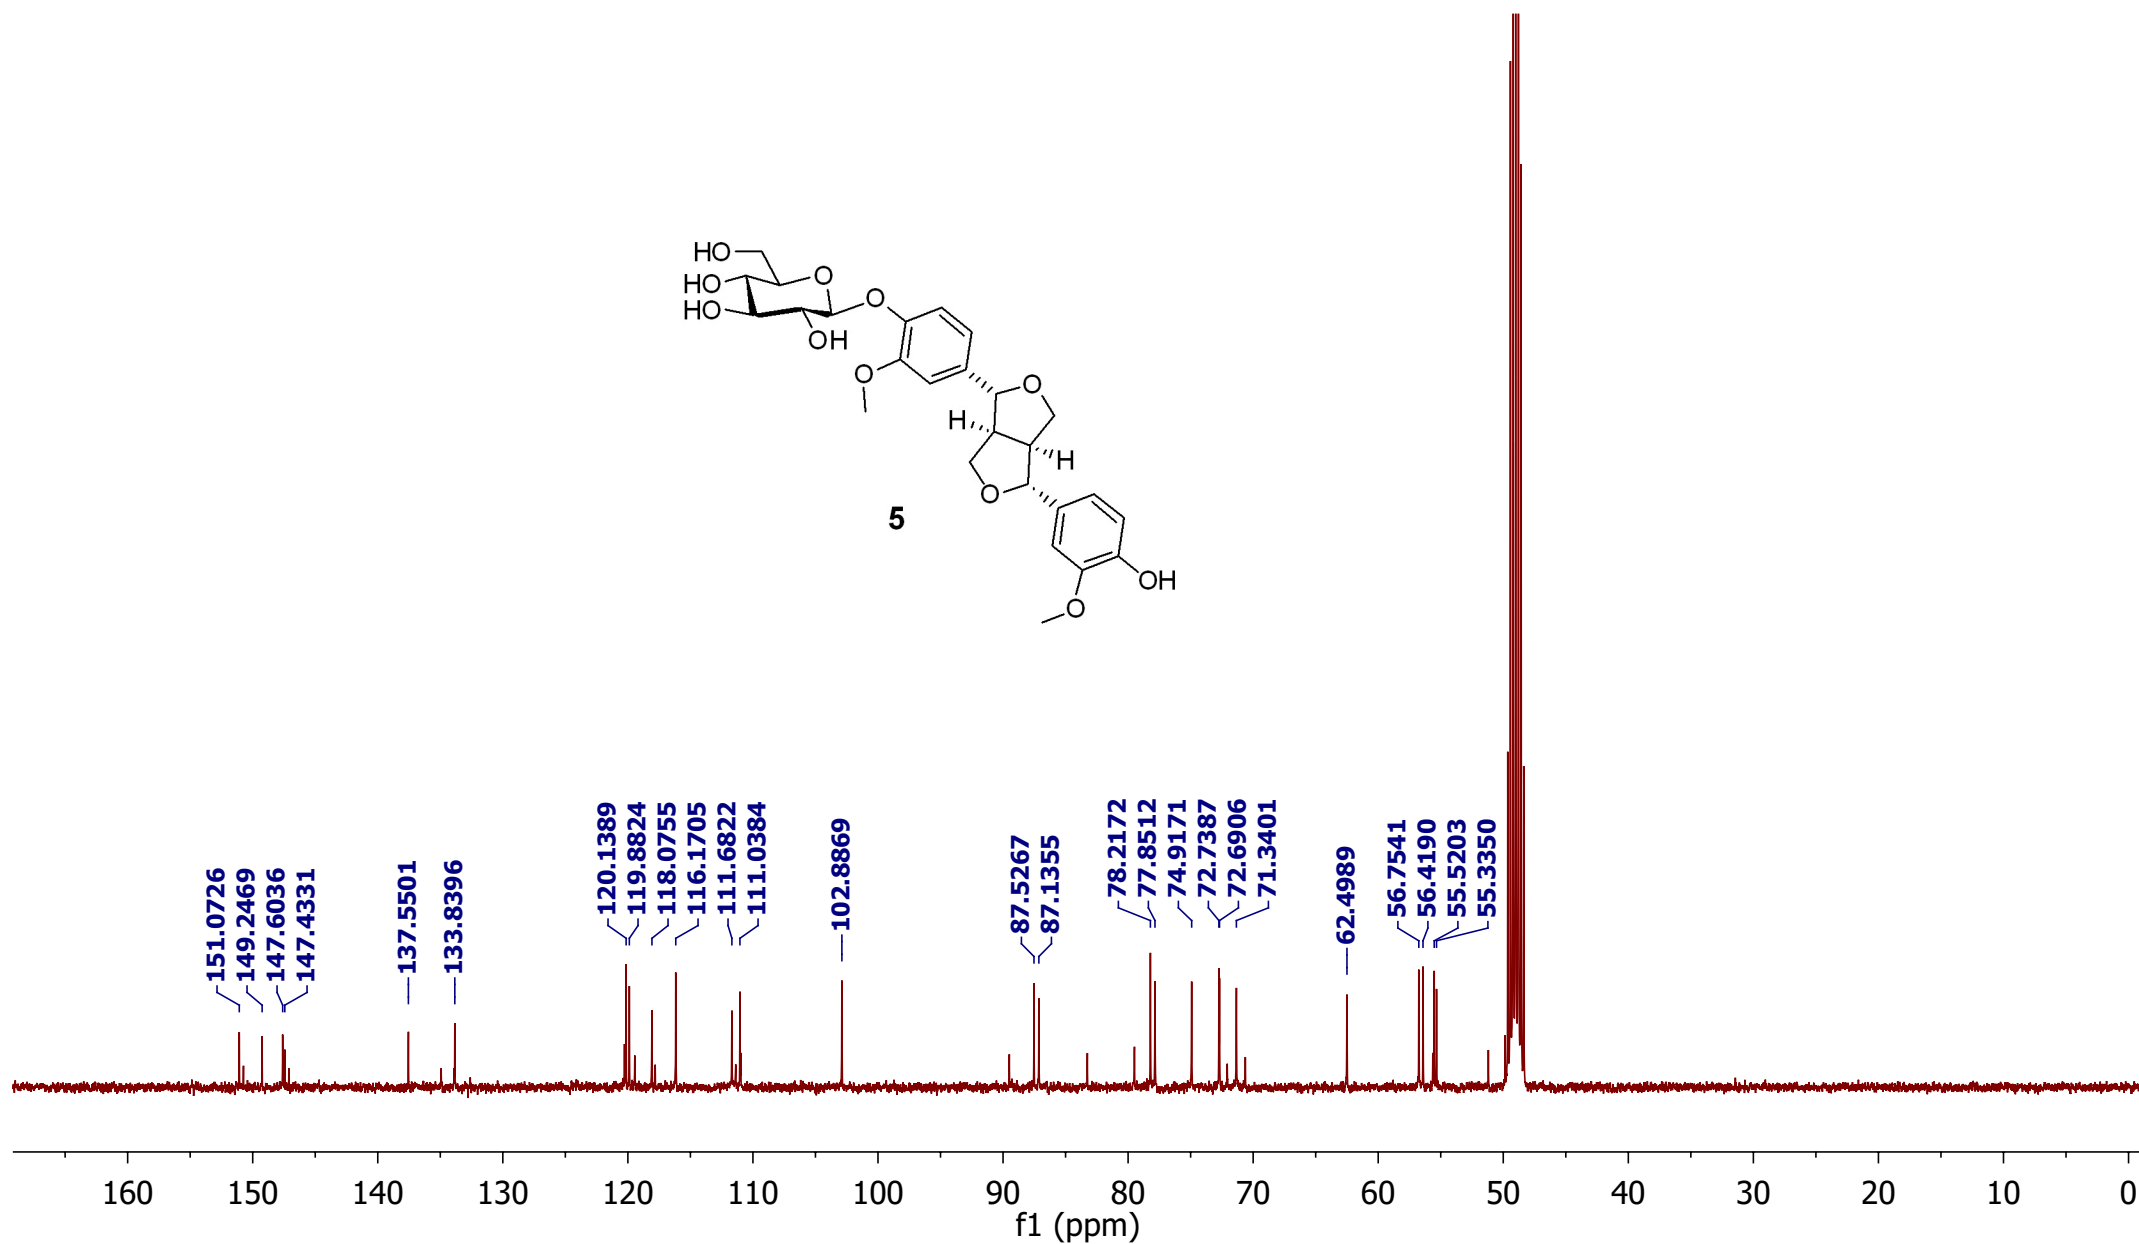

Figure S28.  $^{13}\text{C}$ NMR spectrum of compound 5 ( $\text{CD}_3\text{OD}$ , 100 MHz)



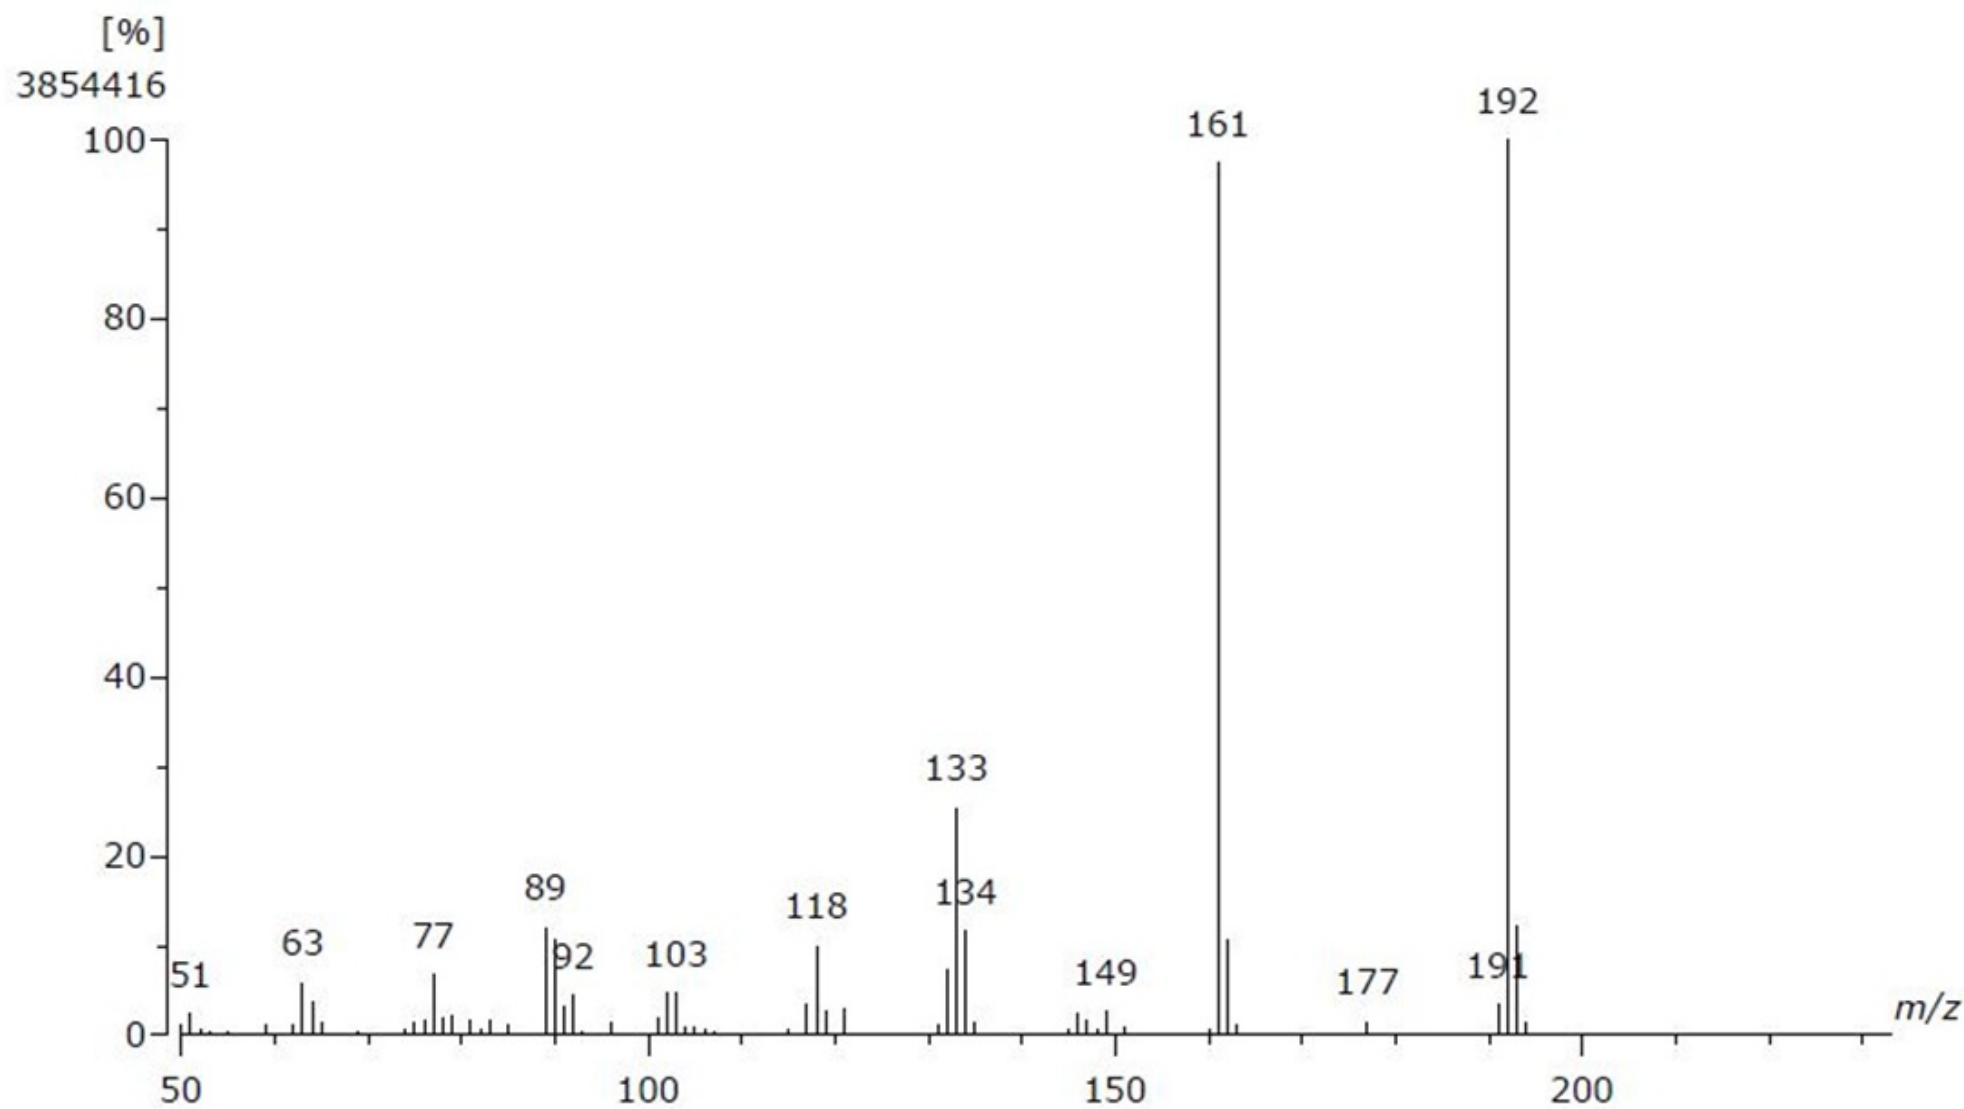

Figure S29. EI-MS spectrum of compound 6

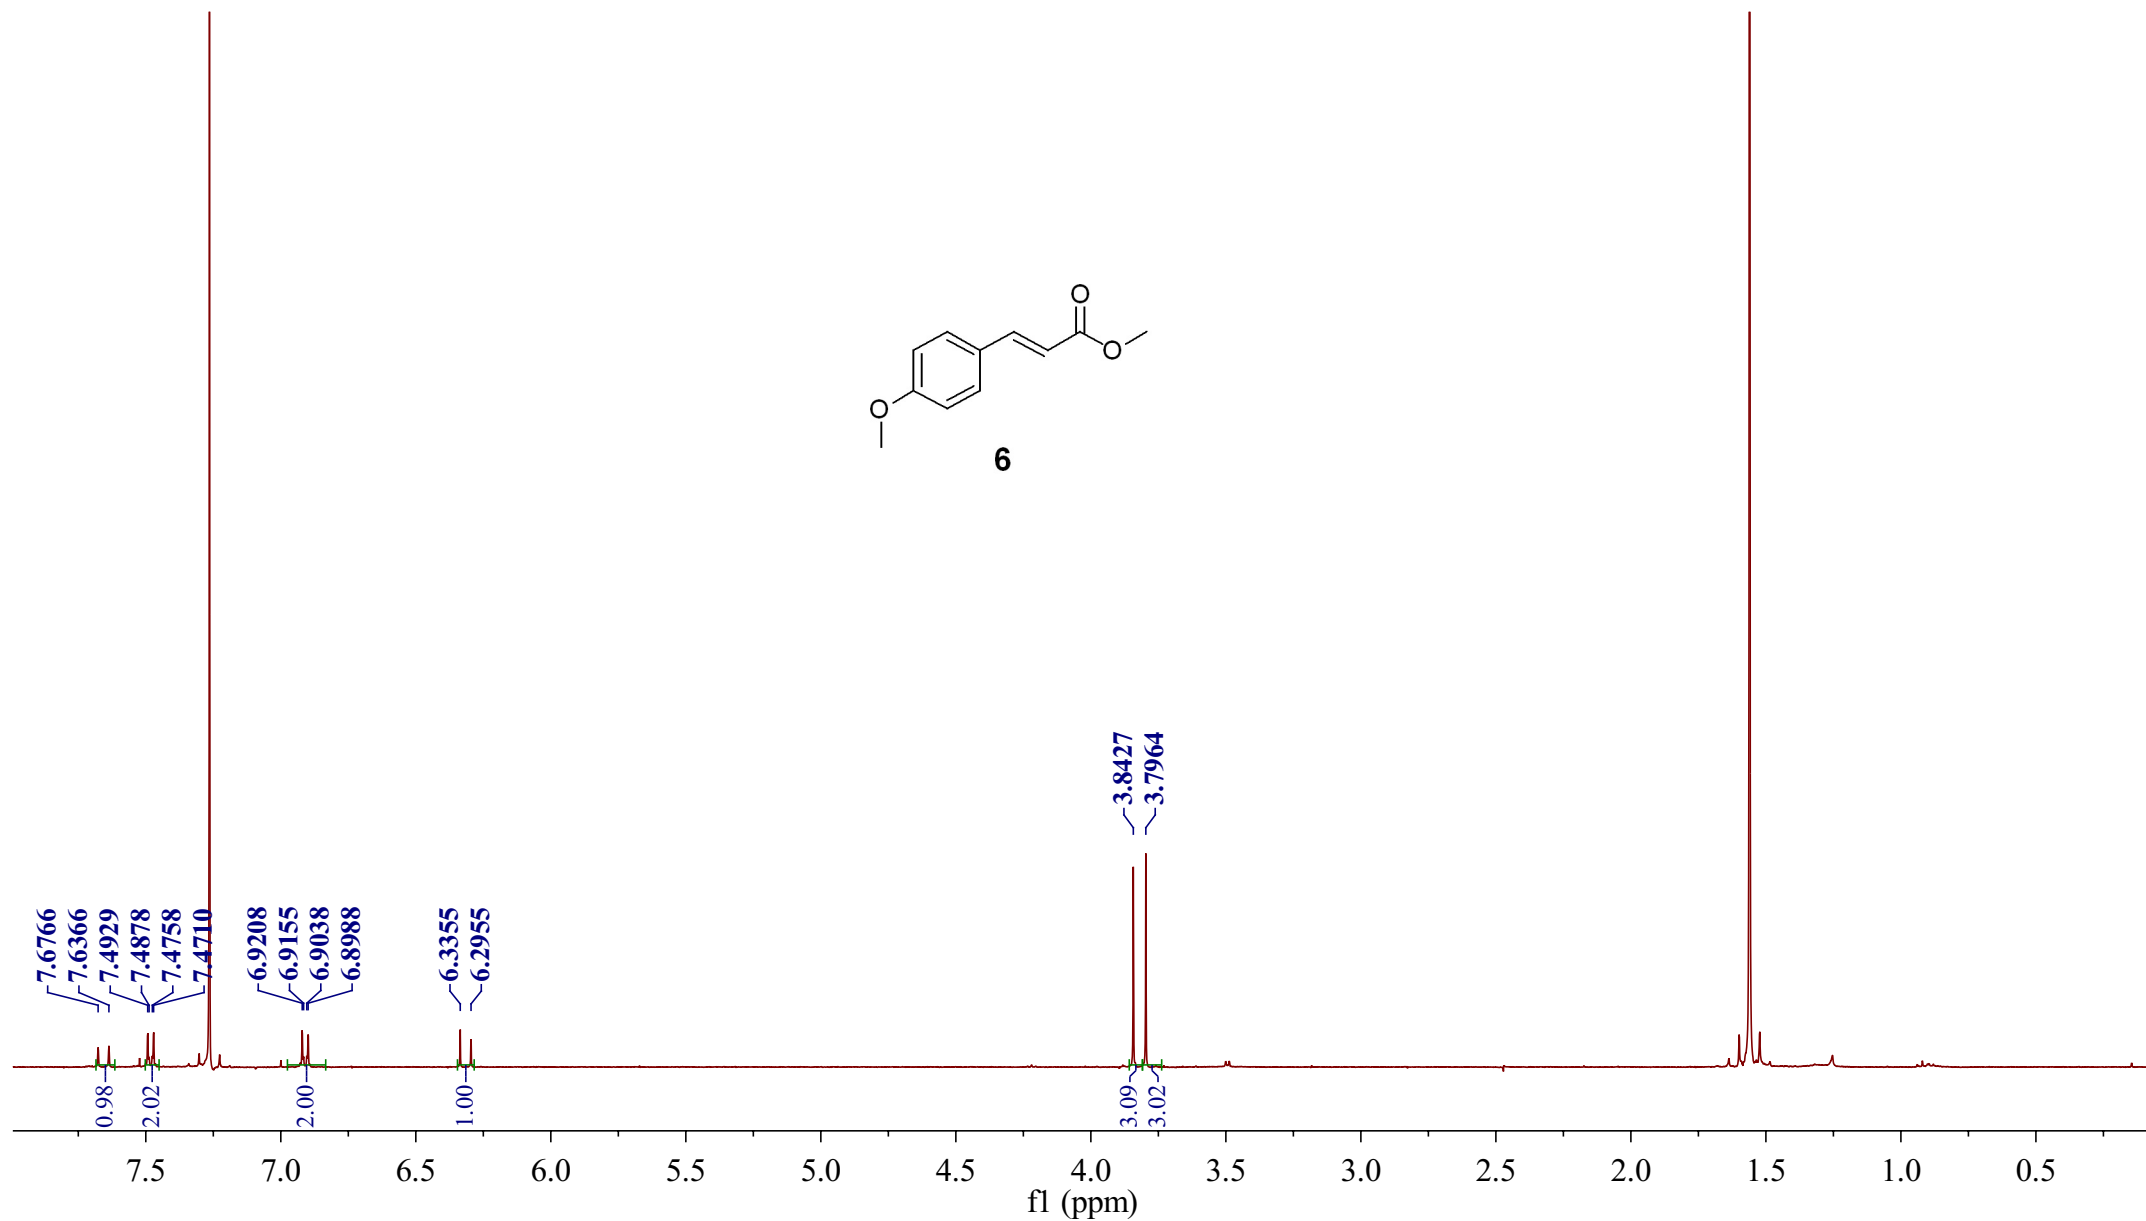

**Figure S30.**  $^1\text{H}$ NMR spectrum of compound **6** ( $\text{CDCl}_3$ , 400 MHz)

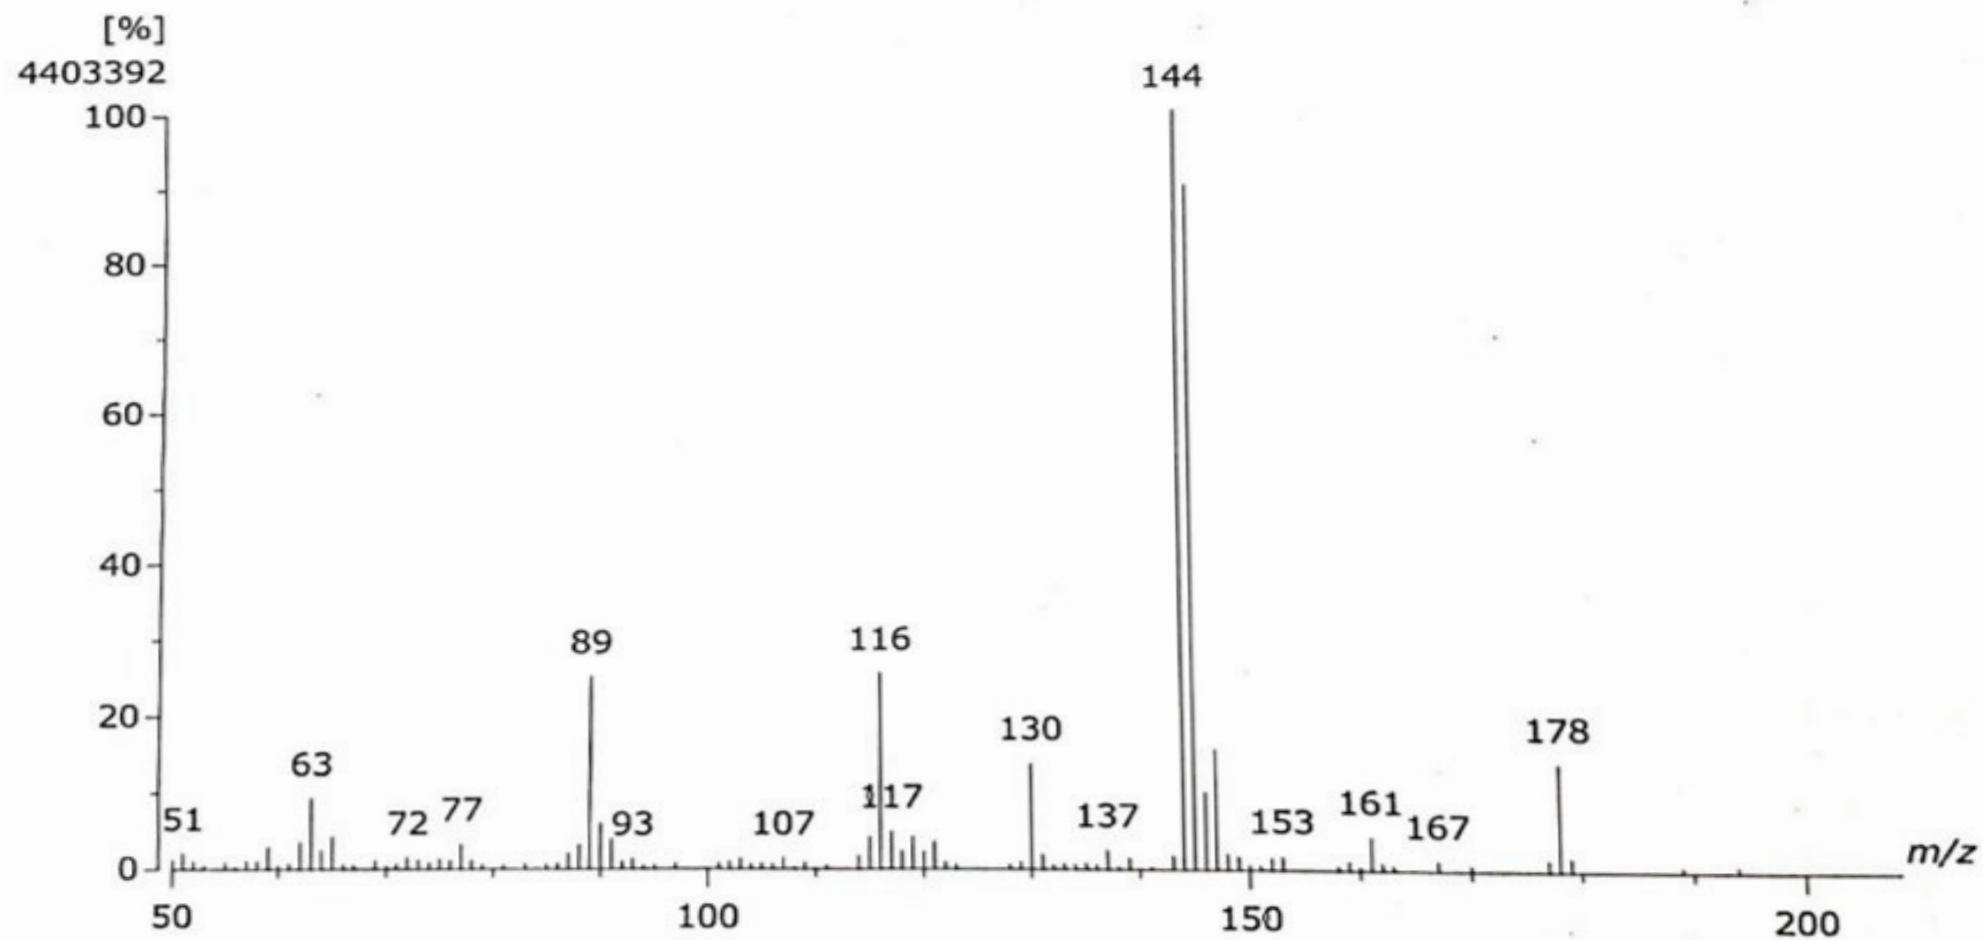

Figure S31. EI-MS spectrum of compound 7

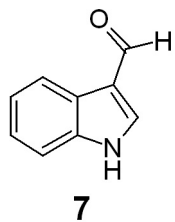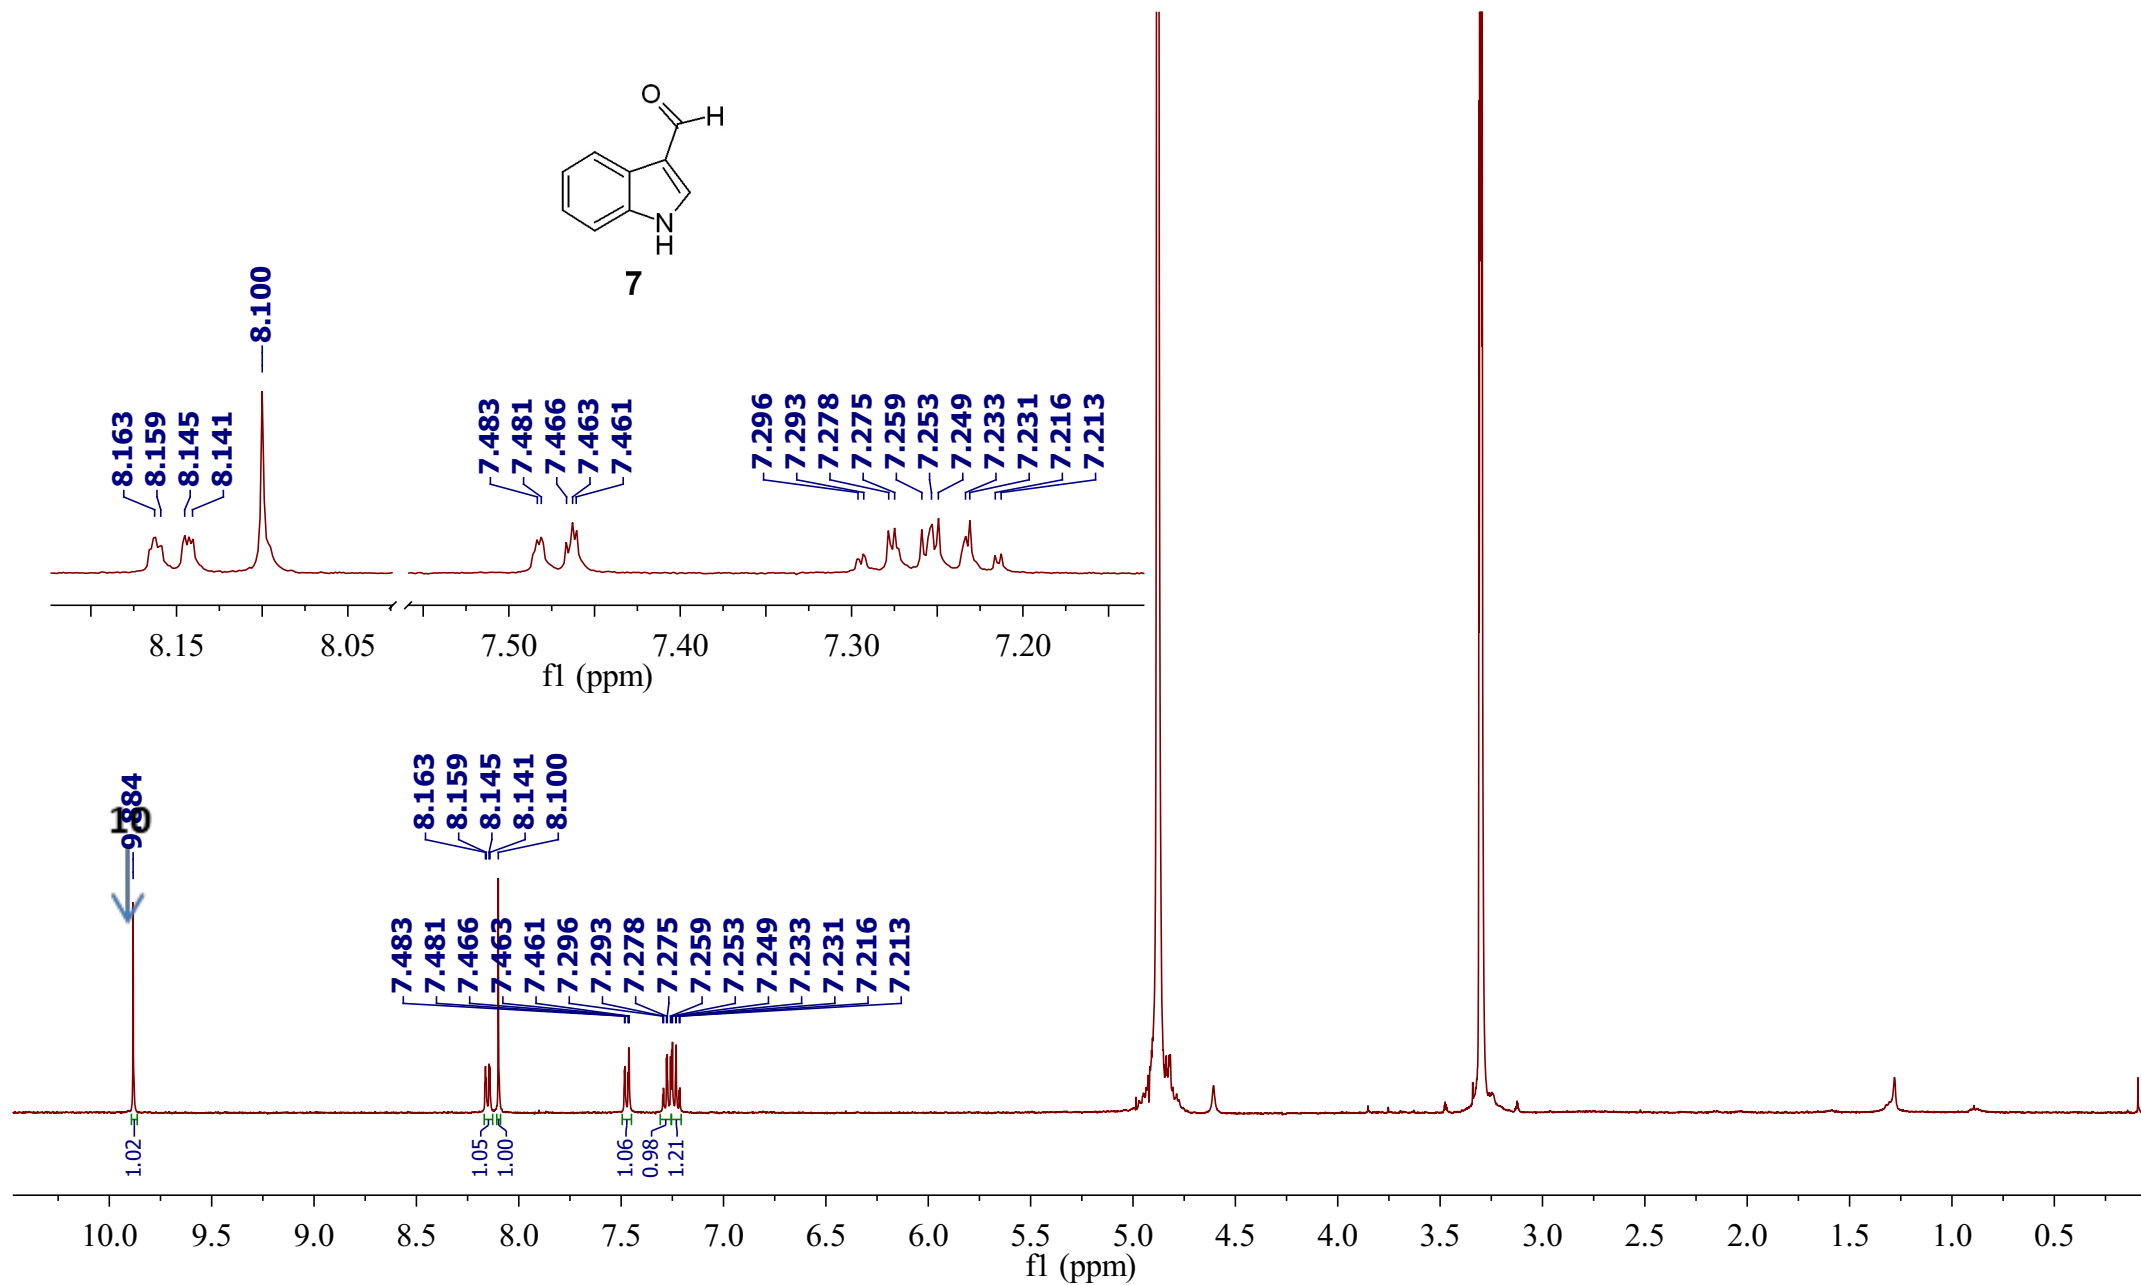

**Figure S32. <sup>1</sup>H NMR spectrum of compound 7 (CD<sub>3</sub>OD, 400 MHz)**

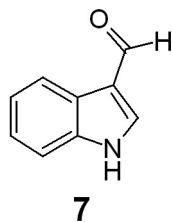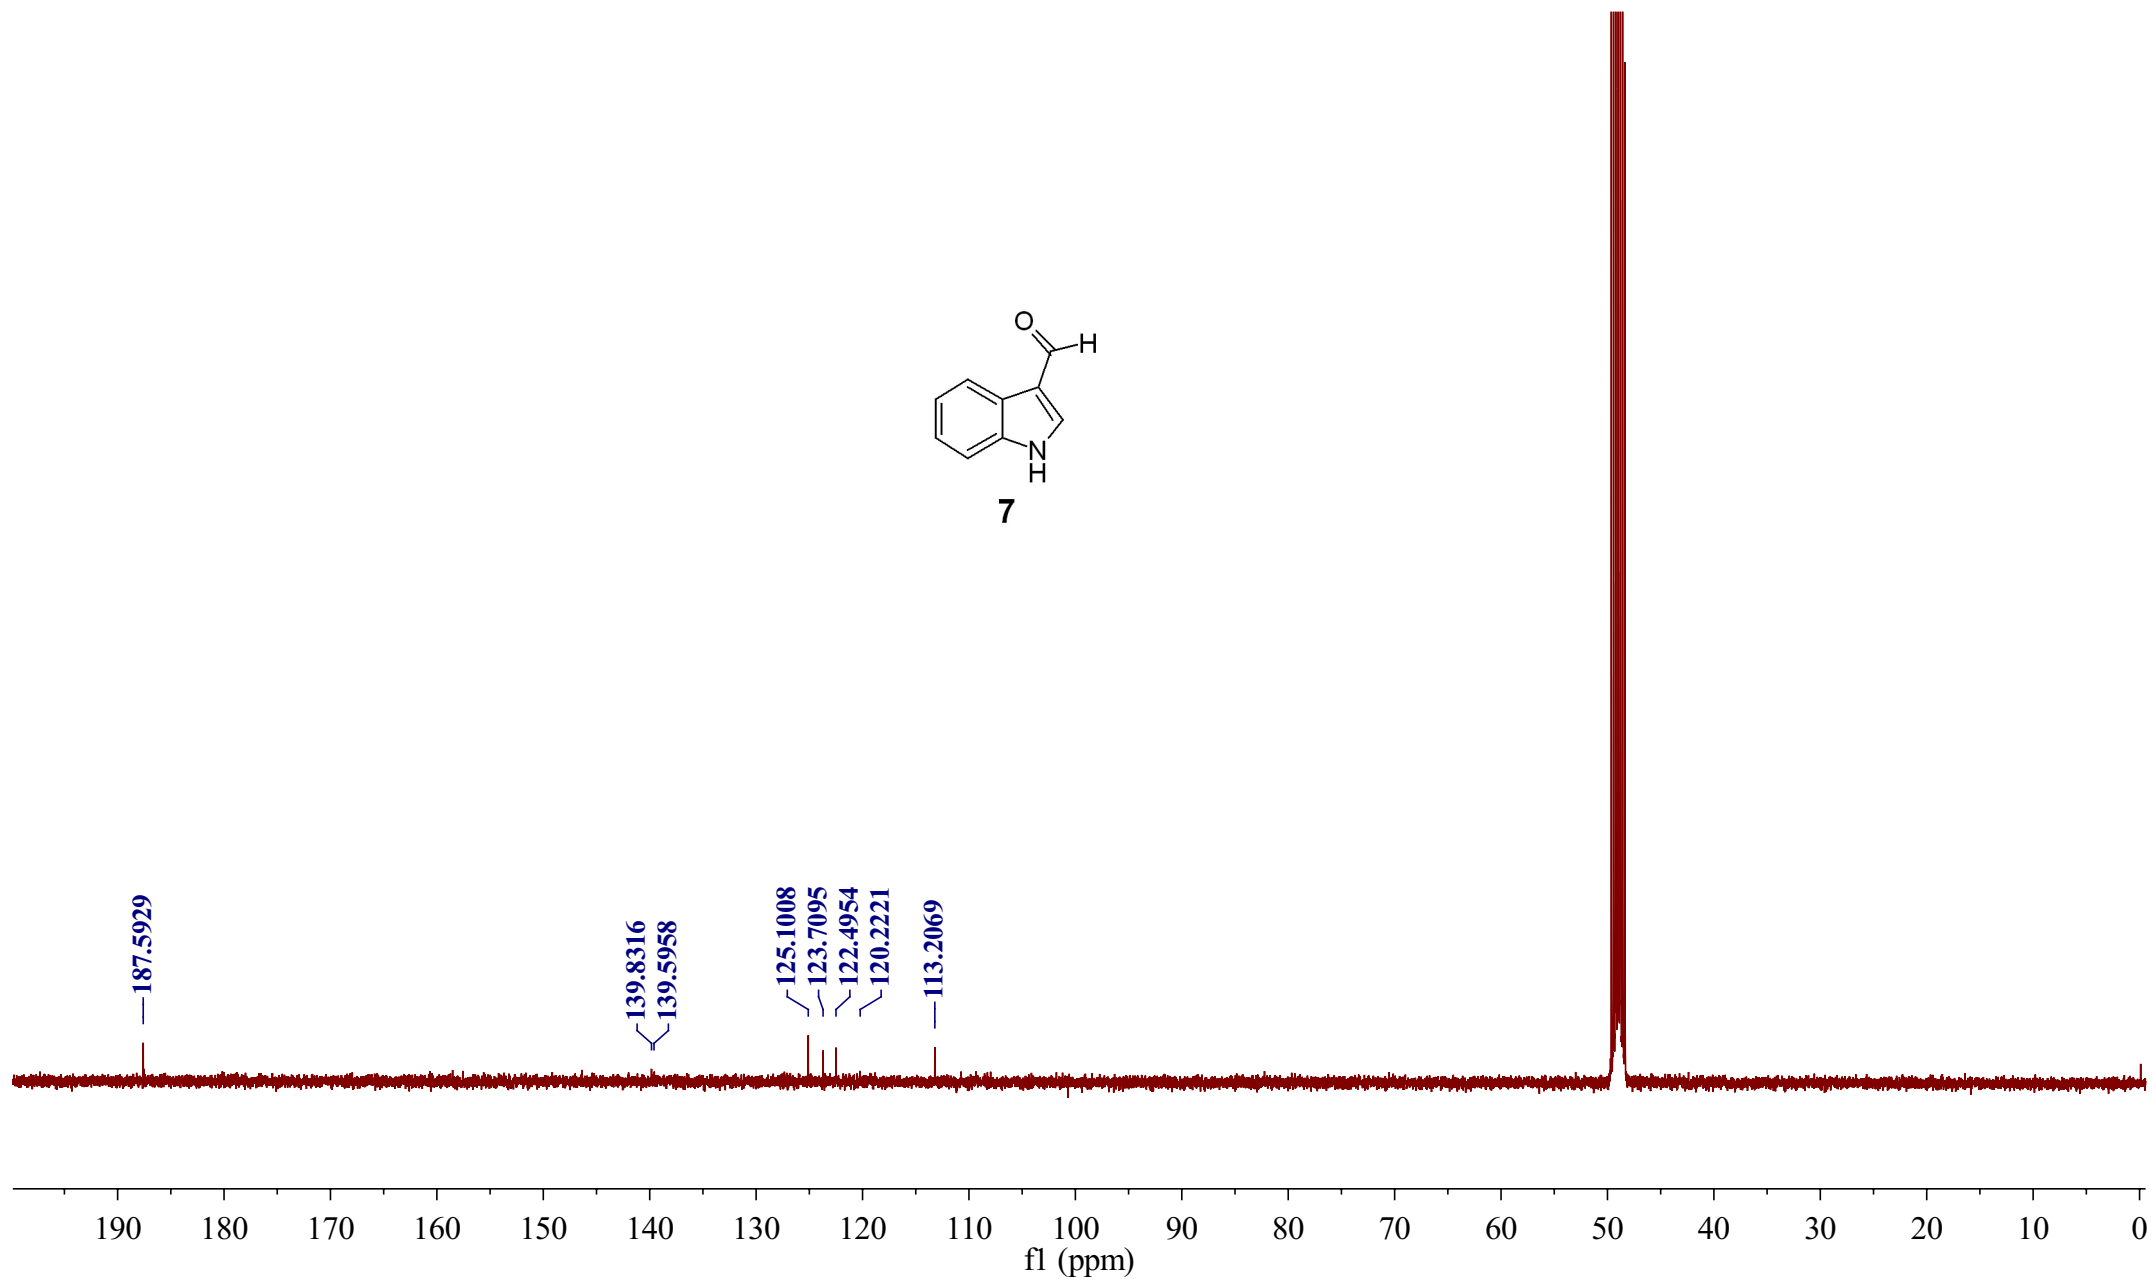

**Figure S33.**  $^{13}\text{C}$ NMR spectrum of compound **7** ( $\text{CD}_3\text{OD}$ , 100 MHz)

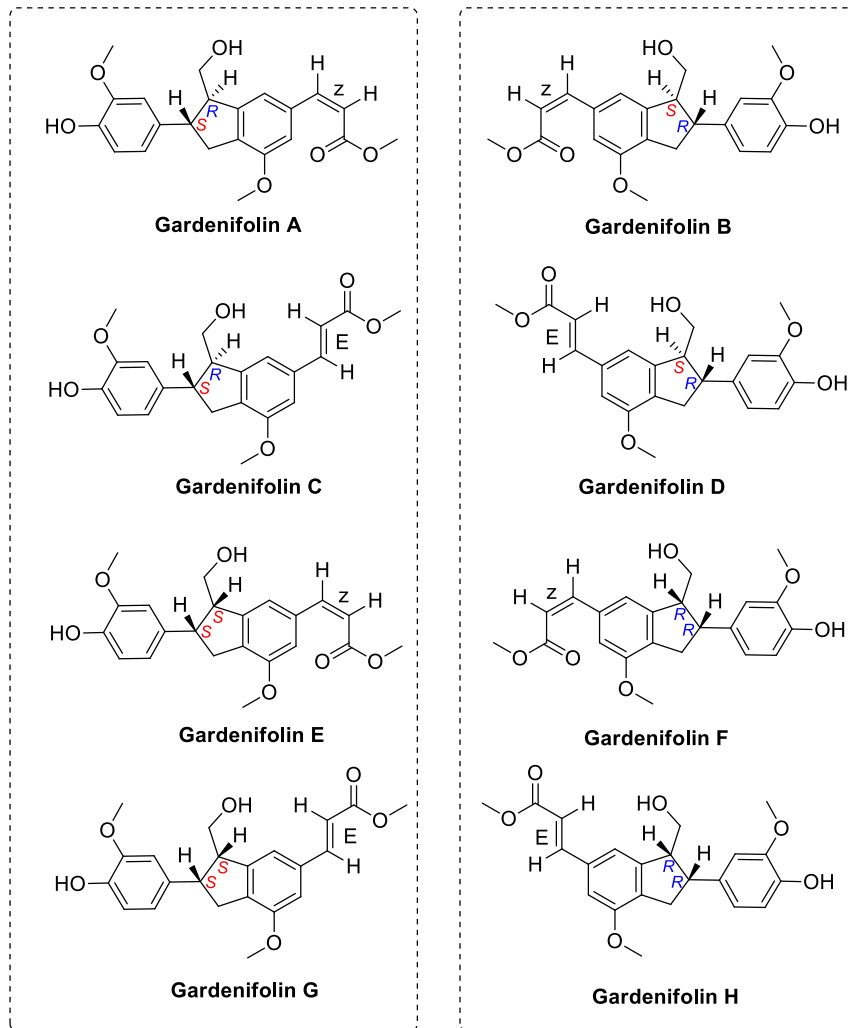

**Figure S34.** Structures of gardenifolins A, C, E, and G and their respective mirror images gardenifolins B, D, F, and H [S1].

Spectroscopic data of the isolated known compounds 2–7.

- Pinioresinol (**2**): A colorless needles,  $^1\text{H}$  NMR ( $\text{CDCl}_3$ , 400 MHz):  $\delta_{\text{H}}$  6.87 (2H, d,  $J = 2.5$  Hz, H-2 and H-2'), 6.86 (2H, d,  $J = 8.1$  Hz, H-5 and H-5'), 6.80 (2H, dd,  $J = 8.1, 1.8$  Hz, H-6 and H-6'), 4.71 (2H, d,  $J = 4.3$  Hz, H-7 and H-7'), 3.08 (2H, m, H-8 and H-8'), 4.22 (2H, dd,  $J = 9.1, 6.9$  Hz, H<sub>2</sub>-9 and H<sub>2</sub>-9'), 3.86 (2H, d,  $J = 3.6$  Hz, H<sub>2</sub>-9 and H<sub>2</sub>-9'), and 3.88 [6H, s, (O-CH<sub>3</sub>)<sub>2</sub>].  $^{13}\text{C}$  NMR ( $\text{CDCl}_3$ , 100 MHz):  $\delta_{\text{C}}$  133.0 (2C, C-1 and C-1'), 108.7 (2C, C-2, and C-2'), 146.9 (2S, C-3 and C-3'), 145.4 (2C, C-4 and C-4'), 114.4 (2C, C-5 and C-5'), 119.1 (2C, C-6 and C-6'), 86.0 (2C, C-7 and C-7'), 54.2 (2C, C-8 and C-8'), 71.7 (2C, C-9 and C-9'), and 56.0 [2C, (O-CH<sub>3</sub>)<sub>2</sub>]. EI-MS  $m/z$  358 [M]<sup>+</sup> [S2].
- Epipinioresinol (**3**): A colorless needles,  $^1\text{H}$  NMR ( $\text{CDCl}_3$ , 400 MHz):  $\delta_{\text{H}}$  6.95 (1H, d,  $J = 1.6$  Hz, H-2), 6.88 (1H, d,  $J = 8.4$  Hz, H-5), 6.84 (1H, dd,  $J = 8.4, 1.6$  Hz, H-6), 4.43 (1H, d,  $J = 7.2$  Hz, H-7), 2.90 (1H, m, H-8), 4.12 (1H, d,  $J = 9.1$  Hz, H<sub>2</sub>-9), 3.83 (1H, d,  $J = 6.4$  Hz, H<sub>2</sub>-9), 6.90 (1H, d,  $J = 1.6$  Hz, H-2'), 6.88 (1H, d,  $J = 8.4$  Hz, H-5'), 6.78 (1H, dd,  $J = 8.2, 1.6$  Hz, H-6'), 4.85 (1H, d,  $J = 5.3$  Hz, H-7'), 3.32 (1H, m, H-8'), 3.33 (1H, m, H<sub>2</sub>-9'), 3.85 (1H, d,  $J = 6.2$  Hz, H<sub>2</sub>-9'), 3.89 (3H, s, O-CH<sub>3</sub>), and 3.91 (3H, s, O-CH<sub>3</sub>).  $^{13}\text{C}$  NMR ( $\text{CDCl}_3$ , 100 MHz):  $\delta_{\text{C}}$  133.0 (C-1), 108.5 (C-2), 146.7 (C-3), 145.3 (C-4), 114.2 (C-5), 119.2 (C-6), 87.7 (C-7), 54.4 (C-8), 70.9 (C-9), 130.3 (C-1'), 108.3 (C-2'), 146.4 (C-3'), 144.6 (C-4'), 114.2 (C-5'), 118.4 (C-6'), 82.0 (C-7'), 50.0 (C-8'), 69.6 (C-9') 55.8 (O-CH<sub>3</sub>), and 55.9 (O-CH<sub>3</sub>). EI-MS  $m/z$  358 [M]<sup>+</sup> [3].
- Phillyrin (**4**): A yellowish white powder,  $^1\text{H}$  NMR ( $\text{DMSO-d}_6$ , 400 MHz):  $\delta_{\text{H}}$  6.96 (1H, brs, H-2), 7.05 (1H, d,  $J = 8.5$  Hz, H-5), 6.90 (1H, br.d,  $J = 8.5$  Hz, H-6), 4.37 (1H, d,  $J = 6.6$  Hz, H-7), 2.83 (1H, dd,  $J = 14.7, 6.7$  Hz, H-8), 4.09 (1H, d,  $J = 9.1$  Hz, H<sub>2</sub>-9), 3.79 (1H, m, H<sub>2</sub>-9), 6.92 (1H, brs, H-2'), 6.87 (1H, d,  $J = 8.5$  Hz, H-5'), 6.90 (1H, brd,  $J = 8.5$  Hz, H-6'), 4.79 (1H, d,  $J = 5.7$  Hz, H-7'), 3.30 (1H, m, H-8'), 3.35 (1H, m, H<sub>2</sub>-9'), 3.79 (1H, m, H<sub>2</sub>-9'), 4.88 (1H, d,  $J = 6.1$  Hz, H-1''), 3.25 (2H, brs, H-2'', H-3''), 3.05 (1H, brs, H-4''), 3.06 (1H, t,  $J = 8.5$  Hz, H-5''), 3.45 (1H, d,  $J = 5.9$  Hz, H<sub>2</sub>-6''), 3.65 (1H, m, H<sub>2</sub>-6''), 3.74 (3H, s, O-CH<sub>3</sub>), 3.75 (3H, s, O-CH<sub>3</sub>), and 3.76 (3H, s, O-CH<sub>3</sub>).  $^{13}\text{C}$  NMR ( $\text{DMSO-d}_6$ , 100 MHz):  $\delta_{\text{C}}$  135.9 (C-1), 111.0 (C-2), 149.6 (C-3), 146.6 (C-4), 115.8 (C-5), 118.8 (C-6), 87.3 (C-7), 54.6 (C-8), 70.9 (C-9), 131.8 (C-1'), 110.0 (C-2'), 149.1 (C-3'), 148.3 (C-4'), 112.1 (C-5'), 118.2 (C-6'), 81.8 (C-7'), 49.8 (C-8'), 69.5 (C-9'), 100.7 (C-1''), 73.8 (C-2''), 77.4 (C-3''), 70.2

(C-4''), 77.6 (C-5''), 61.2 (C-6''), 56.0 [2C, (O-CH<sub>3</sub>)<sub>2</sub>], and 56.2 (O-CH<sub>3</sub>). Positive FABMS *m/z* 557 [M+Na]<sup>+</sup> [4].

- Pinoresinol-4-*O*-β-D-glucoside (5): A yellowish residue, <sup>1</sup>H NMR (CD<sub>3</sub>OD, 400 MHz): δ<sub>H</sub> 7.02 (1H, d, *J* = 1.8 Hz, H-2), 7.13 (1H, d, *J* = 8.4 Hz, H-5), 6.91 (1H, dd, *J* = 8.4, 1.6 Hz, H-6), 4.74 (1H, d, *J* = 4.4 Hz, H-7), 3.19 (1H, m, H-8), 3.84 (1H, H<sub>2</sub>-9), 4.22 (1H, dd, *J* = 9.0, 6.7 Hz, H<sub>2</sub>-9), 6.94 (1H, d, *J* = 1.6 Hz, H-2'), 6.75 (1H, d, *J* = 8.5 Hz, H-5'), 6.79 (1H, dd, *J* = 8.5, 1.6 Hz, H-6'), 4.69 (1H, d, *J* = 4.3 Hz, H-7'), 3.11 (1H, m, H-8'), 3.84 (1H, m, H<sub>2</sub>-9'), 4.22 (1H, dd, *J* = 9.0, 6.7 Hz H<sub>2</sub>-9'), 4.88 (1H, d, *J* = 7.4 Hz, H-1''), 3.47 (1H, m, H-2'') 3.46(1H, m, H-3''), 3.39 (2H, m, H-4'', H-5''), 3.68 (1H, dd, *J* = 12.0, 5.3 Hz, H<sub>2</sub>-6''), 3.85 (1H, m, H<sub>2</sub>-6''), 3.86 (3H, s, O-CH<sub>3</sub>), and 3.84 (3H, s, O-CH<sub>3</sub>). <sup>13</sup>C NMR (CD<sub>3</sub>OD, 100 MHz): δ<sub>C</sub> 137.5 (C-1), 111.6 (C-2), 147.6 (C-3), 151.0 (C-4), 118.0 (C-5), 119.8 (C-6), 87.1 (C-7), 55.5 (C-8), 72.6 (C-9), 133.8 (C-1'), 111.0 (C-2'), 147.4 (C-3'), 149.2 (C-4'), 116.1 (C-5'), 120.1 (C-6'), 87.5 (C-7'), 55.3 (C-8'), 72.7 (C-9'), 102.8 (C-1''), 74.9 (C-2''), 77.8 (C-3''), 71.3 (C-4''), 78.2 (C-5''), 62.4 (C-6''), 56.4 (O-CH<sub>3</sub>), and 56.7 (O-CH<sub>3</sub>). Positive FABMS *m/z* 543 [M+Na]<sup>+</sup> [5].
- *p*-Methoxy-*trans*-methyl cinnamate (6): A white powder, <sup>1</sup>H NMR (CDCl<sub>3</sub>, 400 MHz): δ<sub>H</sub> 7.48 (2H, d, *J* = 8.8 Hz, H-2/H-6), 6.91 (2H, d, *J* = 8.8 Hz, H-3/H-5), 7.65 (1H, d, *J* = 16.0 Hz, H-7), 6.31(1H, d, *J* = 16.0 Hz, H-8), 3.49 (3H, s, O-CH<sub>3</sub>), and 3.84 (3H, s, O-CH<sub>3</sub>). EI-MS *m/z* 192 [M]<sup>+</sup> [6].
- 1H-indole-3-carboxaldehyde (7): A white powder, <sup>1</sup>H NMR (DMSO-d<sub>6</sub>, 400 MHz): δ<sub>H</sub> 8.10 (1H, s, H-2), 8.15 (1H, brd, *J* = 7.2 Hz, H-4), 7.28 (1H, ddd, *J* = 8.8, 7.2, 1.2 Hz, H-5), 7.23 (1H, ddd, *J* = 8.0, 7.2, 1.2 Hz, H-6), 7.47 (1H, brd, *J* = 7.2 Hz, H-7), and 9.88 (1H, H-10). EI-MS *m/z* 145 [M]<sup>+</sup> and positive FABMS *m/z* 146 [M+H]<sup>+</sup> [7,8].



| code                                                                              | IC50 | conc.uM | log conc | %inh     | T2 | T1 | ΔT | RFU2  | RFU1 | ΔRFU  | slope    | K.Activity | EC  |
|-----------------------------------------------------------------------------------|------|---------|----------|----------|----|----|----|-------|------|-------|----------|------------|-----|
| Compound 1                                                                        |      | 10      | 4        | 82.67538 | 30 | 0  | 30 | 0.136 | 0    | 0.136 | 0.026167 | 20.78954   | 120 |
| 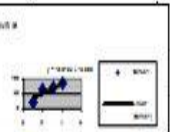 |      | 1       | 3        | 74.77739 | 30 | 0  | 30 | 0.198 | 0    | 0.198 | 0.026167 | 30.26713   | 120 |
|                                                                                   |      | 0.1     | 2        | 60.89222 | 30 | 0  | 30 | 0.307 | 0    | 0.307 | 0.026167 | 46.92934   | 120 |
|                                                                                   |      | 0.01    | 1        | 24.58695 | 30 | 0  | 30 | 0.592 | 0    | 0.592 | 0.026167 | 90.49566   | 120 |
|                                                                                   |      |         |          |          |    |    |    |       |      |       |          |            |     |
| EC                                                                                |      |         |          | 0        | 30 | 0  | 30 | 0.785 | 0    | 0.785 | 0.026167 | 120        | 120 |

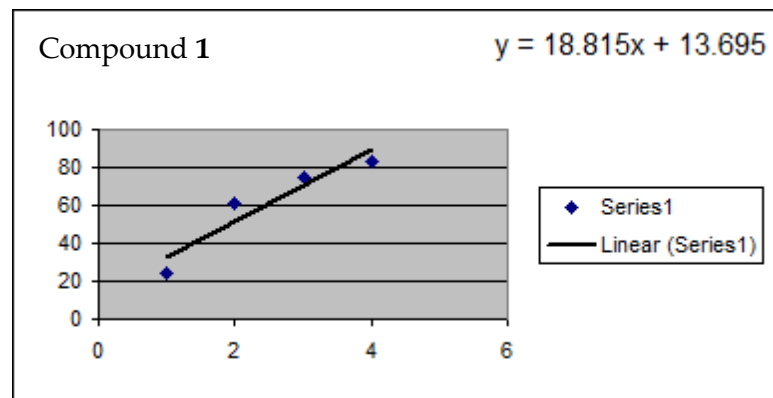

**Figure S35.** Dose-response curve of the anti-AChE assay of compound 1.

| code       | IC50 | conc.uM | log conc | %inh     | T2 | T1 | ΔT | RFU2  | RFU1 | ΔRFU  | slope    | K.Activity | EC  |
|------------|------|---------|----------|----------|----|----|----|-------|------|-------|----------|------------|-----|
| Compound 2 |      | 10      | 4        | 75.54171 | 30 | 0  | 30 | 0.192 | 0    | 0.192 | 0.026167 | 29.34994   | 120 |
|            |      | 1       | 3        | 60.00051 | 30 | 0  | 30 | 0.314 | 0    | 0.314 | 0.026167 | 47.99939   | 120 |
|            |      | 0.1     | 2        | 40.76509 | 30 | 0  | 30 | 0.465 | 0    | 0.465 | 0.026167 | 71.0819    | 120 |
|            |      | 0.01    | 1        | 25.9882  | 30 | 0  | 30 | 0.581 | 0    | 0.581 | 0.026167 | 88.81416   | 120 |
| EC         |      |         |          | 0        | 30 | 0  | 30 | 0.785 | 0    | 0.785 | 0.026167 | 120        | 120 |

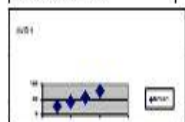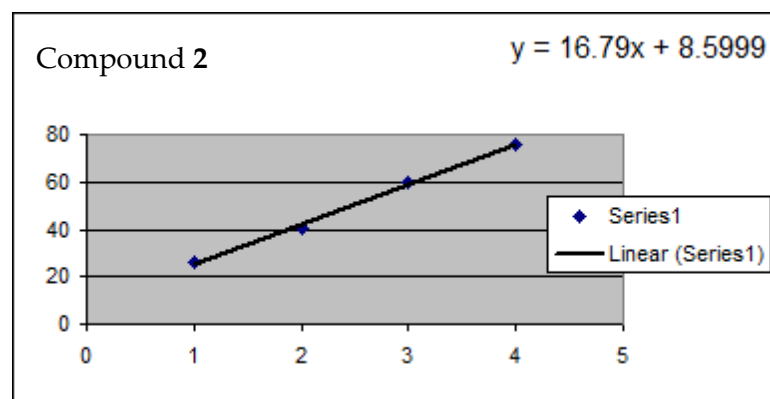

**Figure S36.** Dose-response curve of the anti-AChE assay of compound 2.

| code                                                                              | IC50 | conc.uM | log conc | %inh     | T2 | T1 | ΔT | RFU2  | RFU1 | ΔRFU  | slope    | K.Activity | EC  |
|-----------------------------------------------------------------------------------|------|---------|----------|----------|----|----|----|-------|------|-------|----------|------------|-----|
| Compound 3                                                                        |      | 10      | 4        | 81.78367 | 30 | 0  | 30 | 0.143 | 0    | 0.143 | 0.026167 | 21.85959   | 120 |
| 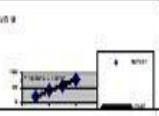 |      | 1       | 3        | 60.38267 | 30 | 0  | 30 | 0.311 | 0    | 0.311 | 0.026167 | 47.5408    | 120 |
|                                                                                   |      | 0.1     | 2        | 43.5676  | 30 | 0  | 30 | 0.443 | 0    | 0.443 | 0.026167 | 67.71888   | 120 |
|                                                                                   |      | 0.01    | 1        | 23.18569 | 30 | 0  | 30 | 0.603 | 0    | 0.603 | 0.026167 | 92.17717   | 120 |
| EC                                                                                |      |         |          | 0        | 30 | 0  | 30 | 0.785 | 0    | 0.785 | 0.026167 | 120        | 120 |

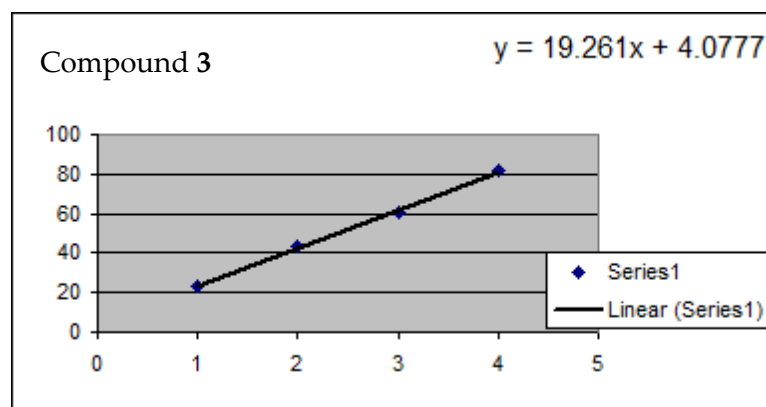

**Figure S37.** Dose-response curve of the anti-AChE assay of compound 3.

| code       | IC50 | conc.uM | log conc | %inh     | T2 | T1 | ΔT | RFU2  | RFU1 | ΔRFU  | slope    | K.Activity | EC  |
|------------|------|---------|----------|----------|----|----|----|-------|------|-------|----------|------------|-----|
| Compound 4 |      | 10      | 4        | 72.86659 | 30 | 0  | 30 | 0.213 | 0    | 0.213 | 0.026167 | 32.56009   | 120 |
|            |      | 1       | 3        | 63.69473 | 30 | 0  | 30 | 0.285 | 0    | 0.285 | 0.026167 | 43.56632   | 120 |
|            |      | 0.1     | 2        | 40.6377  | 30 | 0  | 30 | 0.466 | 0    | 0.466 | 0.026167 | 71.23476   | 120 |
|            |      | 0.01    | 1        | 26.37036 | 30 | 0  | 30 | 0.578 | 0    | 0.578 | 0.026167 | 88.35556   | 120 |
| EC         |      |         |          | 0        | 30 | 0  | 30 | 0.785 | 0    | 0.785 | 0.026167 | 120        | 120 |

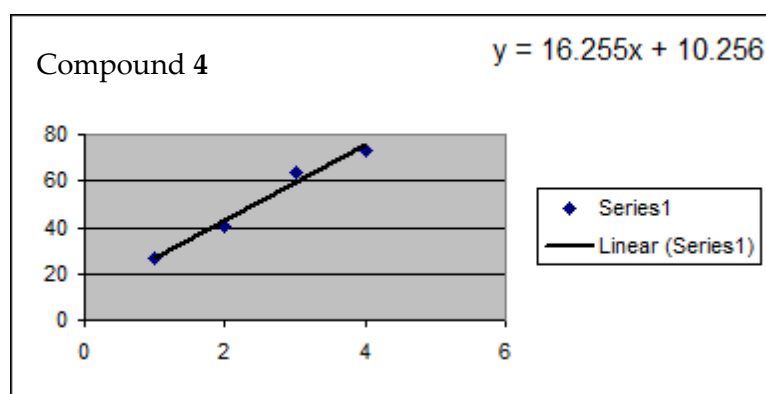

**Figure S38.** Dose-response curve of the anti-AChE assay of compound 4.

| code       | IC50 | conc.uM | log conc | %inh     | T2 | T1 | ΔT | RFU2  | RFU1 | ΔRFU  | slope    | K.Activity | EC  |
|------------|------|---------|----------|----------|----|----|----|-------|------|-------|----------|------------|-----|
| Compound 5 |      | 10      | 4        | 87.77086 | 30 | 0  | 30 | 0.096 | 0    | 0.096 | 0.026167 | 14.67497   | 120 |
|            |      | 1       | 3        | 78.85377 | 30 | 0  | 30 | 0.166 | 0    | 0.166 | 0.026167 | 25.37547   | 120 |
|            |      | 0.1     | 2        | 59.87312 | 30 | 0  | 30 | 0.315 | 0    | 0.315 | 0.026167 | 48.15225   | 120 |
|            |      | 0.01    | 1        | 28.15378 | 30 | 0  | 30 | 0.564 | 0    | 0.564 | 0.026167 | 86.21546   | 120 |
| EC         |      |         |          | 0        | 30 | 0  | 30 | 0.785 | 0    | 0.785 | 0.026167 | 120        | 120 |

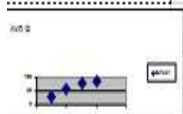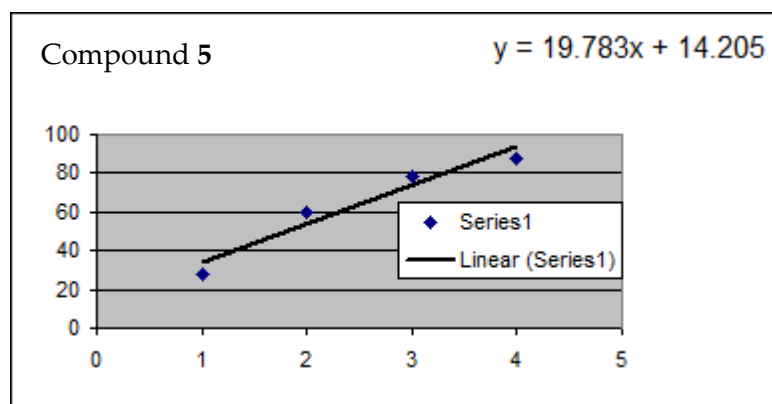

**Figure S39.** Dose-response curve of the anti-AChE assay of compound 5.

**A**

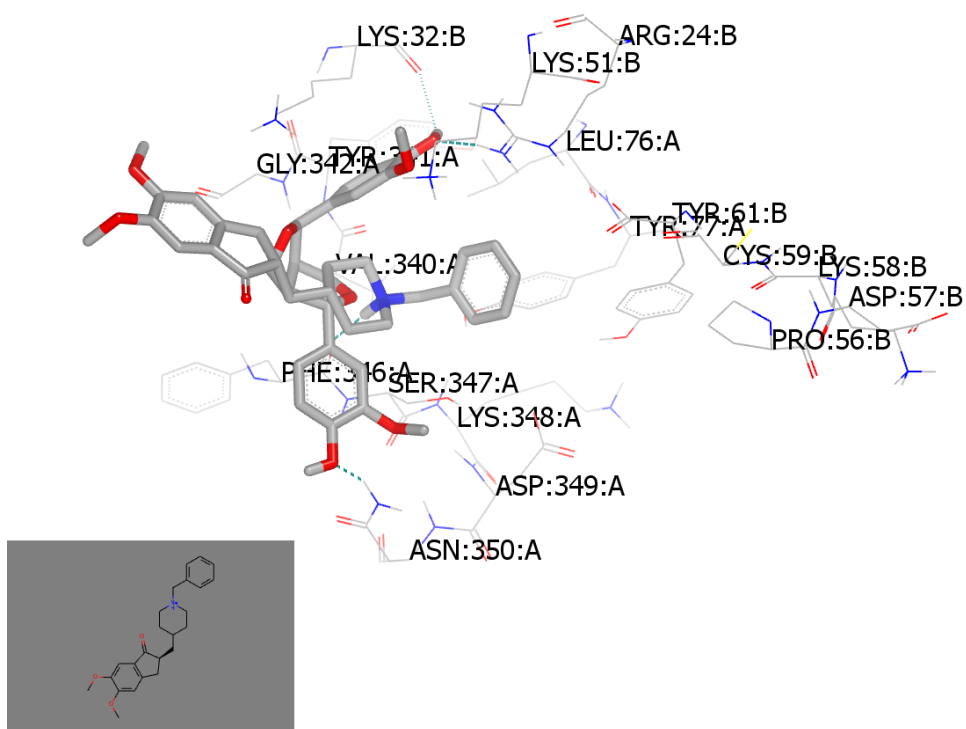

**B**

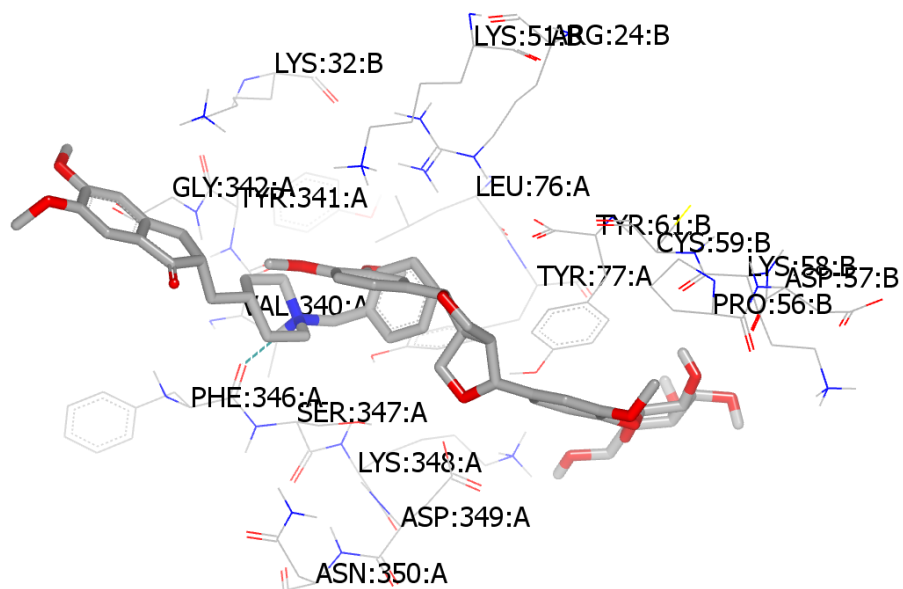

**Figure S40:** The overlay of donepezil with compounds **3** (A) and **4** (B).

**Table S1.** <sup>1</sup>H and <sup>13</sup>C NMR spectral data of compound **1** (CD<sub>3</sub>OD, 500 and 125 MHz, respectively) and pinoresinol (**2**) (CDCl<sub>3</sub>, 400 and 100, respectively).

| Position             | $\delta_{\text{H}}$ in ppm, multiplicity ( <i>J</i> in Hz) |                                | $\delta_{\text{C}}$ in ppm |       |
|----------------------|------------------------------------------------------------|--------------------------------|----------------------------|-------|
|                      | 1                                                          | 2                              | 1                          | 2     |
| 1                    |                                                            |                                | 136.1                      | 133.0 |
| 2                    | 6.95, d ( <i>J</i> = 1.5)                                  | 6.87 (d, <i>J</i> = 2.5)       | 110.9                      | 108.7 |
| 3                    |                                                            |                                | 149.1                      | 146.9 |
| 4                    |                                                            |                                | 147.3                      | 145.4 |
| 5                    | 6.77, d ( <i>J</i> = 8.0)                                  | 6.86 (d, <i>J</i> = 8.1)       | 116.0                      | 114.4 |
| 6                    | 6.92, dd ( <i>J</i> = 8.0, 2.0)                            | 6.80 (dd, <i>J</i> = 8.1, 1.8) | 119.3                      | 119.1 |
| 7                    | 4.74 <sup>a</sup> , d ( <i>J</i> = 4.5)                    | 4.71 (d, <i>J</i> = 4.3)       | 87.6                       | 86.0  |
| 8                    | 3.17 <sup>b</sup> , m                                      | 3.08, m                        | 55.6                       | 54.2  |
| 9                    | 4.23 <sup>c</sup> , ddd ( <i>J</i> = 11.5, 7.0, 2.0)       | 4.22 (dd, <i>J</i> = 9.1, 6.9) | 72.7                       | 71.7  |
|                      | 3.85* (ov) <sup>d</sup>                                    | 3.86 (d, <i>J</i> = 3.6)       |                            |       |
| 1'                   | -                                                          |                                | 133.7                      | 133.0 |
| 2'                   | 6.92, brs.                                                 | 6.87 (d, <i>J</i> = 2.5)       | 112.1                      | 108.7 |
| 3'                   |                                                            |                                | 145.5                      | 146.9 |
| 4'                   |                                                            |                                | 149.0                      | 145.4 |
| 5'                   |                                                            | 6.86 (d, <i>J</i> = 8.1)       | 129.9                      | 114.4 |
| 6'                   | 6.90, brs.                                                 | 6.80 (dd, <i>J</i> = 8.1, 1.8) | 116.0                      | 119.1 |
| 7'                   | 4.72 <sup>a</sup> , d ( <i>J</i> = 4.5)                    | 4.71 (d, <i>J</i> = 4.3)       | 87.4                       | 86.0  |
| 8'                   | 3.15 <sup>b</sup> , m                                      | 3.08, m                        | 55.3                       | 54.2  |
| 9'                   | 4.25 <sup>c</sup> , ddd ( <i>J</i> = 11.5, 7.0, 2.0)       | 4.22 (dd, <i>J</i> = 9.1, 6.9) | 72.5                       | 71.7  |
|                      | 3.84* (ov) <sup>d</sup>                                    | 3.84 (d, <i>J</i> = 3.6)       |                            |       |
| 1''                  | -                                                          |                                | 138.1                      |       |
| 2''                  | 7.03, d ( <i>J</i> = 1.6)                                  |                                | 111.1                      |       |
| 3''                  | -                                                          |                                | 150.9                      |       |
| 4''                  | -                                                          |                                | 147.6                      |       |
| 5''                  | 7.14, d ( <i>J</i> = 8.5)                                  |                                | 118.0                      |       |
| 6''                  | 6.82, dd ( <i>J</i> = 8.5, 1.5)                            |                                | 120.0                      |       |
| 7''                  | 5.58, d ( <i>J</i> = 5.5)                                  |                                | 88.6                       |       |
| 8''                  | 3.48, m                                                    |                                | 55.6                       |       |
| 9''                  | 3.78, dd ( <i>J</i> = 11.0, 7.0)                           |                                | 64.9                       |       |
|                      | 3.85* (ov) <sup>d</sup>                                    |                                |                            |       |
| 1'''                 | 4.89, d ( <i>J</i> = 7.5)                                  |                                | 102.7                      |       |
| 2'''                 | 3.47, dd ( <i>J</i> = 10, 7.5)                             |                                | 74.9                       |       |
| 3'''                 | 3.39, t ( <i>J</i> = 10)                                   |                                | 78.2                       |       |
| 4'''                 | 3.39, m                                                    |                                | 71.3                       |       |
| 5'''                 | 3.45, m                                                    |                                | 77.9                       |       |
| 6'''                 | 3.68, ddd ( <i>J</i> = 12.0, 5.5, 1.5)                     |                                | 62.4                       |       |
|                      | 3.87* (ov)                                                 |                                |                            |       |
| 3'-OCH <sub>3</sub>  | 3.85, s                                                    | 3.88, s                        | 56.4                       | 56.0  |
| 3''-OCH <sub>3</sub> | 3.83, s                                                    |                                | 56.7                       |       |
| 3-OCH <sub>3</sub>   | 3.88, s                                                    | 3.88, s                        | 56.8                       | 56.0  |

\*Multiplicity was not calculated because signals partially overlapped with methoxy signals.

<sup>a,b,c</sup>exchangeable.

(ov)<sup>d</sup> mean overlapped

**Table S2.** Chemical shift differences of H<sub>2</sub>-9 and H<sub>2</sub>-9' ( $\Delta\delta_{H-9}$  and  $\Delta\delta_{H-9'}$ ) of compounds 1–5.

| Compound | $\Delta\delta_{H-9}$ | $\Delta\delta_{H-9'}$ | Deuterated solvent          |
|----------|----------------------|-----------------------|-----------------------------|
| 1        | 0.38                 | 0.41                  | CD <sub>3</sub> OD          |
| 2        | 0.36                 | 0.38                  | CDCl <sub>3</sub>           |
| 3        | 0.29                 | 0.52                  | CDCl <sub>3</sub>           |
| 4        | 0.30                 | 0.44                  | DMSO- <i>d</i> <sub>6</sub> |
| 5        | 0.38                 | 0.38                  | CD <sub>3</sub> OD          |

## References

- [S1] Tshitenge, D.T.; Feineis, D.; Awale, S.; Bringmann, G. Gardenifolins A–H, scalemic neolignans from *Gardenia ternifolia*: Chiral resolution, configurational assignment, and cytotoxic activities against the HeLa cancer cell line. *J. Nat. Prod.* **2017**, *80*, 1604–1614 <https://doi.org/10.1021/acs.jnatprod.7b00180>
- [S2] Tsukamoto, H.; Hisada, S.; Nishibe, S.; Lignans from bark of *Fraxinus mandshurica* var. *japonica* and *F. japonica*. *Chem. Phar. Bull.* **1984**, *32*, 4482–4489 <https://doi.org/10.1248/cpb.32.4482>.
- [S3] Nishibe, S.; Tsukamoto, H.; Hisada, S. Effects of O-Methylation and O-Glucosylation on Carbon-13 Nuclear Magnetic Resonance Chemical Shifts of Matairesinol, (+)-Pinoresinol and (+)-Epipinoresinol. *Chem. Pharm. Bull.* **1984**, *32*, 4653–4657, <https://doi.org/10.1248/CPB.32.4653>.
- [S4] Rahman, M. M. A., Dewick, P. M., Jackson, D. E., & Lucas, J. A. Lignans of *Forsythia intermedia*. *Phytochemistry*, 1990, *29*, 1971–1980 [https://doi.org/10.1016/0031-9422\(90\)85050-P](https://doi.org/10.1016/0031-9422(90)85050-P).
- [S5] Dae, K. K.; Jong, P. L.; Jin, W. K.; Hee, W. P.; Jae, S. E. Antitumor and antiinflammatory constituents from *Celtis sinensis*. *Arch. Pharm. Res.* **2005**, *28*, 39–43 <https://doi.org/10.1007/BF02975133>.
- [S6] Gao, L.; Xu, X.; Nan, H.; Yang, J.; Sun, G.; Wu, H.; Zhong, M. Isolation of cinnamic acid derivatives from the root of *Rheum tanguticum* Maxim. ex Balf. And its significance. *J. Med. Plant Res*, **2012**, *6*, 929–931 <https://doi.org/10.5897/JMPR11.1497>
- [S7] El-Sawy, E.; Abo-Salem, H.; Mandour, A. 1H-Indole-3-carboxaldehyde: synthesis and reactions. *Egypt. J. Chem.* **2017**, *60*, 723–751 <https://doi.org/10.21608/ejchem.2017.1097.1053>.
- [S8] Gutierrez-Lugo, M. T.; Woldemichael, G. M.; Singh, M. P.; Suarez, P. A.; Maiese, W. M.; Montenegro, G.; Timmermann, B. N.; Isolation of three new naturally occurring compounds from the culture of *Micromonospora* sp. P1068. *Nat. Prod. Res.* 2006, *19*, 645–652 <https://doi.org/10.1080/14786410412331272040>
